# Supplementary material for: Building the vertebrate codex using the gene breaking protein trap library
Source: eLife. 2020 Aug 11;9:e54572. doi: 10.7554/eLife.54572 (PMC7486118; doi:10.7554/eLife.54572)
Supplement: Figure 3—source data 1. — Source data analyzing relative expression of lrpprc mRNA in six dpf-larvae with RFP expression and dark liver phenotype crossed with heterozyous lrpprc+/mn0235Gt adults. no RT: no reverse transcriptase, RT: with reverse transcriptase, DL: dark liver phenotype, Cq: quantification cycle, d: delta, KD: knockdown, N/A: not applicable. [file elife-54572-fig3-data1.xlsx]

## Sheet: Figure 3 - Source Data 1
Figure 3 - Source Data 1
Source data analysing relative expression of lrpprc mRNA in 6 dpf-larvae with RFP expression and dark liver phenotype crossed heterozyous lrpprc+/gbt235 adults.
no RT; no reverse transcriptase, RT; with reverse transcriptase, DL; dark liver phenotype, Cq; quantification cycle, d; delta, KD; knockdown, N/A; not applicable
Conditions		Experimental groups	Animal	lrpprc				eef1a1l1								Clutch 1	Clutch 2	Clutch 3	Clutch 4
				Cq (Technical repicate 1)	Cq (Technical repicate 2)	Cq (Technical repicate 3)	Avarage Cq	Cq (Technical repicate 1)	Cq (Technical repicate 2)	Cq (Technical repicate 3)	Avarage Cq	dCq	2^(-dCq)		WT, mean of 2^(-dCq)	0.00600295	0.00382083	0.0122879	0.0240176
Clutch 1	No RT	WT	1E	40	40	N/A	40	29.11	29.29	N/A	29.2	10.8	0.000560888		RFP+/DL+, mean of 2^(-dCq)	1.436e-06	1.89021e-06	2.49409e-06	4.95376e-06
			1F	40	40	N/A	40	29.45	29.2	N/A	29.325	10.675	0.000611653		Relative expression	0.000239216	0.000494712	0.000202971	0.000206255
			1G	40	40	N/A	40	29.01	29.19	N/A	29.1	10.9	0.000523327		RNA remaining (%)	0.0239216	0.0494712	0.0202971	0.0206255
		RFP+/DL+	1A	40	40	N/A	40	29.06	29.75	N/A	29.405	10.595	0.000646528		KD efficiency (%)	99.9761	99.9505	99.9797	99.9794
			1B	40	40	N/A	40	29.11	30.21	N/A	29.66	10.34	0.000771525		mean of KD efficiency (%)	99.9714
			1C	40	40	N/A	40	28.95	30.22	N/A	29.585	10.415	0.000732441
	RT	WT	1E	28.7	28.65	28.89	28.7467	21.1	21.07	21.29	21.1533	7.59333	0.0051782
			1F	29.01	29.04	28.85	28.9667	21.41	21.09	21.65	21.3833	7.58333	0.00521422
			1G	28.56	28.77	28.58	28.6367	21.55	21.72	21.53	21.6	7.03667	0.00761644
		RFP+/DL+	1A	40	40	40	40	20.69	20.44	20.24	20.4567	19.5433	1.30879e-06
			1B	40	40	40	40	20.8	21.01	20.42	20.7433	19.2567	1.59649e-06
			1C	40	40	40	40	20.78	20.51	20.38	20.5567	19.4433	1.40273e-06
Cltuch 2	No RT	WT	2D	39.38	40	N/A	39.69	28.57	28.72	N/A	28.645	11.045	0.000473286
			2E	40	40	N/A	40	30.11	28.87	N/A	29.49	10.51	0.000685764
			2F	40	40	N/A	40	29.6	33.52	N/A	31.56	8.44	0.00287943
		RFP+/DL+	2A	40	40	N/A	40	29.63	29.39	N/A	29.51	10.49	0.000695337
			2B	40	40	N/A	40	29.16	28.78	N/A	28.97	11.03	0.000478233
			2C	40	40	N/A	40	28.82	28.98	N/A	28.9	11.1	0.000455583
	RT	WT	2D	29.1	28.89	29.42	29.1367	21.44	20.99	20.93	21.12	8.01667	0.00386138
			2E	29.83	29.74	30.32	29.9633	21.71	21.58	21.69	21.66	8.30333	0.00316554
			2F	28.74	28.97	29.11	28.94	20.5	20.56	22.31	21.1233	7.81667	0.00443556
		RFP+/DL+	2A	40	40	40	40	20.68	20.57	20.66	20.6367	19.3633	1.48271e-06
			2B	40	40	40	40	20.17	20.01	20.16	20.1133	19.8867	1.03161e-06
			2C	40	40	40	40	21.01	20.84	23.33	21.7267	18.2733	3.1563e-06
Clutch 3	No RT	WT	4E	40	40	N/A	40	40	40	N/A	40	0	1
			4F	40	40	N/A	40	40	40	N/A	40	0	1
			4G	37.62	38.69	N/A	38.155	40	40	N/A	40	-1.845	3.59253
		RFP+/DL+	4A	40	40	N/A	40	40	40	N/A	40	0	1
			4B	40	40	N/A	40	40	40	N/A	40	0	1
			4C	40	34.18	N/A	37.09	36.92	40	N/A	38.46	-1.37	2.58471
	RT	WT	4E	28.38	28.24	28.35	28.3233	22.44	22.34	22.03	22.27	6.05333	0.0150579
			4F	28.13	N/A	28.16	28.145	21.34	21.15	21.27	21.2533	6.89167	0.00842174
			4G	28.6	28.43	28.41	28.48	22.14	22.38	22.25	22.2567	6.22333	0.0133841
		RFP+/DL+	4A	40	40	40	40	21.61	21.46	21.17	21.4133	18.5867	2.54013e-06
			4B	40	40	40	40	21.24	21.21	20.12	20.8567	19.1433	1.72696e-06
			4C	40	40	40	40	21.73	21.84	21.69	21.7533	18.2467	3.21519e-06
Cltuch 4	No RT	WT	5E	40	40	N/A	40	37.99	40	N/A	38.995	1.005	0.49827
			5F	40	39.5	N/A	39.75	40	38.17	N/A	39.085	0.665	0.630689
			5G	39.89	40	N/A	39.945	40	40	N/A	40	-0.055	1.03886
		RFP+/DL+	5A	40	40	N/A	40	40	40	N/A	40	0	1
			5B	40	40	N/A	40	32.4	40	N/A	36.2	3.8	0.0717936
			5C	40	40	N/A	40	40	40	N/A	40	0	1
	RT	WT	5E	28.32	28.09	28.11	28.1733	23.32	22.54	22.63	22.83	5.34333	0.0246318
			5F	27.47	27.46	27.87	27.6	22.41	22.02	22.17	22.2	5.4	0.0236831
			5G	27.67	28.82	28.97	28.4867	23	23.14	23.13	23.09	5.39667	0.0237379
		RFP+/DL+	5A	40	39.73	39.92	39.8833	22.35	22.25	22.09	22.23	17.6533	4.85084e-06
			5B	40	40	40	40	22.33	22.41	22.21	22.3167	17.6833	4.75101e-06
			5C	40	40	40	40	22.59	22.46	22.34	22.4633	17.5367	5.25941e-06
