# Supplementary material for: Building the vertebrate codex using the gene breaking protein trap library
Source: eLife. 2020 Aug 11;9:e54572. doi: 10.7554/eLife.54572 (PMC7486118; doi:10.7554/eLife.54572)
Supplement: Figure 4—figure supplement 1—source data 1. — wt = ryr1b+/+, gbt348hom = ryr1bmn0348Gt/mn0348Gt, peak = peak ∆F/F0, and peaknum = number of transients/responses ≥ 0.05 ∆F/F0. [file elife-54572-fig4-figsupp1-data1.xlsx]

## Sheet: cell348_panel A_B
cell	gene	peak	peaknum
1	wt	0.45784	1
2	wt	0.877295	1
3	wt	0.688761	1
4	wt	0.251133	1
5	wt	1.42356	1
6	wt	4.50549	3
7	wt	3.09387	3
8	wt	1.34699	3
9	wt	1.09988	3
10	wt	1.72163	3
11	wt	2.60362	2
12	wt	0.46331	2
13	wt	0.891948	2
14	wt	0.714652	2
15	wt	5.98586	2
16	wt	0.744663	2
17	wt	0.379731	2
18	wt	1.53891	2
19	wt	0.795809	2
20	wt	0.769439	2
21	wt	1.34672	2
22	wt	0.679638	2
23	wt	1.652	2
24	wt	2.43818	2
25	wt	2.475	2
26	wt	1.13438	2
27	wt	3.1672	2
28	wt	0.261247	2
29	wt	0.248962	1
30	wt	0.121552	1
31	wt	0.136425	1
32	wt	0.0640598	1
33	wt	4.69235	1
34	wt	4.08019	3
35	wt	5.53998	3
36	wt	3.53076	3
37	wt	2.81211	3
38	wt	8.11211	3
39	wt	2.38457	3
40	wt	8.42028	1
41	wt	8.15427	1
42	wt	1.41314	1
43	wt	0.218703	1
44	wt	3.85301	2
45	wt	7.84499	2
46	wt	5.90641	3
47	wt	2.71223	3
48	wt	2.23135	3
49	wt	0.692931	4
50	wt	1.15703	4
51	wt	0.849833	4
52	wt	7.58824	1
53	wt	7.21519	1
54	wt	4.10855	2
55	wt	4.4904	1
56	wt	6.93849	1
57	wt	7.27604	1
58	wt	7.17343	1
59	wt	0.948014	9
60	wt	1.7485	9
61	wt	4.47374	2
62	wt	4.73025	2
63	wt	4.97462	3
64	wt	5.72461	3
65	gbt348hom	0.115518	1
66	gbt348hom	0.758233	1
67	gbt348hom	0.0383672	0
68	gbt348hom	0.0443272	0
69	gbt348hom	0.0126685	0
70	gbt348hom	0.0609523	1
71	gbt348hom	0.00189939	0
72	gbt348hom	0.007985	0
73	gbt348hom	0.0331513	0
74	gbt348hom	0.0161507	0
75	gbt348hom	0.00443209	0
76	gbt348hom	0.0023887	0
77	gbt348hom	0.0129806	0
78	gbt348hom	0	0
79	gbt348hom	0	0
80	gbt348hom	0	0
81	gbt348hom	0.00310153	0
82	gbt348hom	0.0120184	0
83	gbt348hom	0	0
84	gbt348hom	0.00331877	0
85	gbt348hom	0.0554791	1
86	gbt348hom	0.0349336	0
87	gbt348hom	0.181716	1
88	gbt348hom	0.00930816	0
89	gbt348hom	0.00397771	0
90	gbt348hom	0.015682	0
91	gbt348hom	0.0102151	0
92	gbt348hom	0	0
93	gbt348hom	0.411903	1
94	gbt348hom	0.0894855	1
95	gbt348hom	0.258491	3
96	gbt348hom	1.8981	3
97	gbt348hom	0.188875	3
98	gbt348hom	0.0168319	0
99	gbt348hom	0.519844	8
100	gbt348hom	0.0284032	1
101	gbt348hom	0.0998992	2
102	gbt348hom	0	0
103	gbt348hom	0	0
104	gbt348hom	0	0
105	gbt348hom	0	0
106	gbt348hom	0.00918017	0
107	gbt348hom	0.474653	4
108	gbt348hom	0.0559169	3
109	gbt348hom	0.0483316	1
110	gbt348hom	0.0284974	0
111	gbt348hom	0.0639505	4
112	gbt348hom	0.0461455	1

## Sheet: cell348WT_panel A_B
cell	gene	peak	peaknum
1	wt	0.45784	1
2	wt	0.877295	1
3	wt	0.688761	1
4	wt	0.251133	1
5	wt	1.42356	1
6	wt	4.50549	3
7	wt	3.09387	3
8	wt	1.34699	3
9	wt	1.09988	3
10	wt	1.72163	3
11	wt	2.60362	2
12	wt	0.46331	2
13	wt	0.891948	2
14	wt	0.714652	2
15	wt	5.98586	2
16	wt	0.744663	2
17	wt	0.379731	2
18	wt	1.53891	2
19	wt	0.795809	2
20	wt	0.769439	2
21	wt	1.34672	2
22	wt	0.679638	2
23	wt	1.652	2
24	wt	2.43818	2
25	wt	2.475	2
26	wt	1.13438	2
27	wt	3.1672	2
28	wt	0.261247	2
29	wt	0.248962	1
30	wt	0.121552	1
31	wt	0.136425	1
32	wt	0.0640598	1
33	wt	4.69235	1
34	wt	4.08019	3
35	wt	5.53998	3
36	wt	3.53076	3
37	wt	2.81211	3
38	wt	8.11211	3
39	wt	2.38457	3
40	wt	8.42028	1
41	wt	8.15427	1
42	wt	1.41314	1
43	wt	0.218703	1
44	wt	3.85301	2
45	wt	7.84499	2
46	wt	5.90641	3
47	wt	2.71223	3
48	wt	2.23135	3
49	wt	0.692931	4
50	wt	1.15703	4
51	wt	0.849833	4
52	wt	7.58824	1
53	wt	7.21519	1
54	wt	4.10855	2
55	wt	4.4904	1
56	wt	6.93849	1
57	wt	7.27604	1
58	wt	7.17343	1
59	wt	0.948014	9
60	wt	1.7485	9
61	wt	4.47374	2
62	wt	4.73025	2
63	wt	4.97462	3
64	wt	5.72461	3

## Sheet: cell348GBT_panel A_B
cell	gene	peak	peaknum
65	gbt348hom	0.115518	1
66	gbt348hom	0.758233	1
67	gbt348hom	0.0383672	0
68	gbt348hom	0.0443272	0
69	gbt348hom	0.0126685	0
70	gbt348hom	0.0609523	1
71	gbt348hom	0.00189939	0
72	gbt348hom	0.007985	0
73	gbt348hom	0.0331513	0
74	gbt348hom	0.0161507	0
75	gbt348hom	0.00443209	0
76	gbt348hom	0.0023887	0
77	gbt348hom	0.0129806	0
78	gbt348hom	0	0
79	gbt348hom	0	0
80	gbt348hom	0	0
81	gbt348hom	0.00310153	0
82	gbt348hom	0.0120184	0
83	gbt348hom	0	0
84	gbt348hom	0.00331877	0
85	gbt348hom	0.0554791	1
86	gbt348hom	0.0349336	0
87	gbt348hom	0.181716	1
88	gbt348hom	0.00930816	0
89	gbt348hom	0.00397771	0
90	gbt348hom	0.015682	0
91	gbt348hom	0.0102151	0
92	gbt348hom	0	0
93	gbt348hom	0.411903	1
94	gbt348hom	0.0894855	1
95	gbt348hom	0.258491	3
96	gbt348hom	1.8981	3
97	gbt348hom	0.188875	3
98	gbt348hom	0.0168319	0
99	gbt348hom	0.519844	8
100	gbt348hom	0.0284032	1
101	gbt348hom	0.0998992	2
102	gbt348hom	0	0
103	gbt348hom	0	0
104	gbt348hom	0	0
105	gbt348hom	0	0
106	gbt348hom	0.00918017	0
107	gbt348hom	0.474653	4
108	gbt348hom	0.0559169	3
109	gbt348hom	0.0483316	1
110	gbt348hom	0.0284974	0
111	gbt348hom	0.0639505	4
112	gbt348hom	0.0461455	1

## Sheet: cell348x_panel A
cell	gene	peak	peaknum
1	wt	0.45784	1
2	wt	0.877295	1
3	wt	0.688761	1
4	wt	0.251133	1
5	wt	1.42356	1
6	wt	4.50549	3
7	wt	3.09387	3
8	wt	1.34699	3
9	wt	1.09988	3
10	wt	1.72163	3
11	wt	2.60362	2
12	wt	0.46331	2
13	wt	0.891948	2
14	wt	0.714652	2
15	wt	5.98586	2
16	wt	0.744663	2
17	wt	0.379731	2
18	wt	1.53891	2
19	wt	0.795809	2
20	wt	0.769439	2
21	wt	1.34672	2
22	wt	0.679638	2
23	wt	1.652	2
24	wt	2.43818	2
25	wt	2.475	2
26	wt	1.13438	2
27	wt	3.1672	2
28	wt	0.261247	2
29	wt	0.248962	1
30	wt	0.121552	1
31	wt	0.136425	1
32	wt	0.0640598	1
33	wt	4.69235	1
34	wt	4.08019	3
35	wt	5.53998	3
36	wt	3.53076	3
37	wt	2.81211	3
38	wt	8.11211	3
39	wt	2.38457	3
40	wt	8.42028	1
41	wt	8.15427	1
42	wt	1.41314	1
43	wt	0.218703	1
44	wt	3.85301	2
45	wt	7.84499	2
46	wt	5.90641	3
47	wt	2.71223	3
48	wt	2.23135	3
49	wt	0.692931	4
50	wt	1.15703	4
51	wt	0.849833	4
52	wt	7.58824	1
53	wt	7.21519	1
54	wt	4.10855	2
55	wt	4.4904	1
56	wt	6.93849	1
57	wt	7.27604	1
58	wt	7.17343	1
59	wt	0.948014	9
60	wt	1.7485	9
61	wt	4.47374	2
62	wt	4.73025	2
63	wt	4.97462	3
64	wt	5.72461	3
65	gbt348hom	0.115518	1
66	gbt348hom	0.758233	1
67	gbt348hom	0.0383672	0
68	gbt348hom	0.0443272	0
69	gbt348hom	0.0126685	0
70	gbt348hom	0.0609523	1
71	gbt348hom	0.00189939	0
72	gbt348hom	0.007985	0
73	gbt348hom	0.0331513	0
74	gbt348hom	0.0161507	0
75	gbt348hom	0.00443209	0
76	gbt348hom	0.0023887	0
77	gbt348hom	0.0129806	0
78	gbt348hom	0	0
79	gbt348hom	0	0
80	gbt348hom	0	0
81	gbt348hom	0.00310153	0
82	gbt348hom	0.0120184	0
83	gbt348hom	0	0
84	gbt348hom	0.00331877	0
85	gbt348hom	0.0554791	1
86	gbt348hom	0.0349336	0
87	gbt348hom	0.181716	1
88	gbt348hom	0.00930816	0
89	gbt348hom	0.00397771	0
90	gbt348hom	0.015682	0
91	gbt348hom	0.0102151	0
92	gbt348hom	0	0
93	gbt348hom	0.411903	1
94	gbt348hom	0.0894855	1
95	gbt348hom	0.258491	3
97	gbt348hom	0.188875	3
98	gbt348hom	0.0168319	0
99	gbt348hom	0.519844	8
100	gbt348hom	0.0284032	1
101	gbt348hom	0.0998992	2
102	gbt348hom	0	0
103	gbt348hom	0	0
104	gbt348hom	0	0
105	gbt348hom	0	0
106	gbt348hom	0.00918017	0
107	gbt348hom	0.474653	4
108	gbt348hom	0.0559169	3
109	gbt348hom	0.0483316	1
110	gbt348hom	0.0284974	0
111	gbt348hom	0.0639505	4
112	gbt348hom	0.0461455	1

## Sheet: cell348xp_panel B
cell	gene	peak	peaknum
1	wt	0.45784	1
2	wt	0.877295	1
3	wt	0.688761	1
4	wt	0.251133	1
5	wt	1.42356	1
6	wt	4.50549	3
7	wt	3.09387	3
8	wt	1.34699	3
9	wt	1.09988	3
10	wt	1.72163	3
11	wt	2.60362	2
12	wt	0.46331	2
13	wt	0.891948	2
14	wt	0.714652	2
15	wt	5.98586	2
16	wt	0.744663	2
17	wt	0.379731	2
18	wt	1.53891	2
19	wt	0.795809	2
20	wt	0.769439	2
21	wt	1.34672	2
22	wt	0.679638	2
23	wt	1.652	2
24	wt	2.43818	2
25	wt	2.475	2
26	wt	1.13438	2
27	wt	3.1672	2
28	wt	0.261247	2
29	wt	0.248962	1
30	wt	0.121552	1
31	wt	0.136425	1
32	wt	0.0640598	1
33	wt	4.69235	1
34	wt	4.08019	3
35	wt	5.53998	3
36	wt	3.53076	3
37	wt	2.81211	3
38	wt	8.11211	3
39	wt	2.38457	3
40	wt	8.42028	1
41	wt	8.15427	1
42	wt	1.41314	1
43	wt	0.218703	1
44	wt	3.85301	2
45	wt	7.84499	2
46	wt	5.90641	3
47	wt	2.71223	3
48	wt	2.23135	3
49	wt	0.692931	4
50	wt	1.15703	4
51	wt	0.849833	4
52	wt	7.58824	1
53	wt	7.21519	1
54	wt	4.10855	2
55	wt	4.4904	1
56	wt	6.93849	1
57	wt	7.27604	1
58	wt	7.17343	1
60	wt	0.948014	9
61	wt	4.47374	2
62	wt	4.73025	2
63	wt	4.97462	3
64	wt	5.72461	3
65	gbt348hom	0.115518	1
66	gbt348hom	0.758233	1
67	gbt348hom	0.0383672	0
68	gbt348hom	0.0443272	0
69	gbt348hom	0.0126685	0
70	gbt348hom	0.0609523	1
71	gbt348hom	0.00189939	0
72	gbt348hom	0.007985	0
73	gbt348hom	0.0331513	0
74	gbt348hom	0.0161507	0
75	gbt348hom	0.00443209	0
76	gbt348hom	0.0023887	0
77	gbt348hom	0.0129806	0
78	gbt348hom	0	0
79	gbt348hom	0	0
80	gbt348hom	0	0
81	gbt348hom	0.00310153	0
82	gbt348hom	0.0120184	0
83	gbt348hom	0	0
84	gbt348hom	0.00331877	0
85	gbt348hom	0.0554791	1
86	gbt348hom	0.0349336	0
87	gbt348hom	0.181716	1
88	gbt348hom	0.00930816	0
89	gbt348hom	0.00397771	0
90	gbt348hom	0.015682	0
91	gbt348hom	0.0102151	0
92	gbt348hom	0	0
93	gbt348hom	0.411903	1
94	gbt348hom	0.0894855	1
95	gbt348hom	0.258491	3
96	gbt348hom	1.8981	3
97	gbt348hom	0.188875	3
98	gbt348hom	0.0168319	0
100	gbt348hom	0.0284032	1
101	gbt348hom	0.0998992	2
102	gbt348hom	0	0
103	gbt348hom	0	0
104	gbt348hom	0	0
105	gbt348hom	0	0
106	gbt348hom	0.00918017	0
107	gbt348hom	0.474653	4
108	gbt348hom	0.0559169	3
109	gbt348hom	0.0483316	1
110	gbt348hom	0.0284974	0
111	gbt348hom	0.0639505	4
112	gbt348hom	0.0461455	1

## Sheet: dataset1xy_power analysis _A
data	genotype
0.45784	WT
0.877295	WT
0.688761	WT
0.251133	WT
1.42356	WT
4.50549	WT
3.09387	WT
1.34699	WT
1.09988	WT
1.72163	WT
2.60362	WT
0.46331	WT
0.891948	WT
0.714652	WT
5.98586	WT
0.744663	WT
0.379731	WT
1.53891	WT
0.795809	WT
0.769439	WT
1.34672	WT
0.679638	WT
1.652	WT
2.43818	WT
2.475	WT
1.13438	WT
3.1672	WT
0.261247	WT
0.248962	WT
0.121552	WT
0.136425	WT
0.0640598	WT
0.115518	Hom
0.758233	Hom
0.0383672	Hom
0.0443272	Hom
0.0126685	Hom
0.0609523	Hom
0.00189939	Hom
0.007985	Hom
0.0331513	Hom
0.0161507	Hom
0.00443209	Hom
0.0023887	Hom
0.0129806	Hom
0	Hom
0	Hom
0	Hom
0.00310153	Hom
0.0120184	Hom
0	Hom
0.00331877	Hom
0.0554791	Hom
0.0349336	Hom
0.181716	Hom
0.00930816	Hom
0.00397771	Hom
0.015682	Hom
0.0102151	Hom
