# Supplementary material for: Building the vertebrate codex using the gene breaking protein trap library
Source: eLife. 2020 Aug 11;9:e54572. doi: 10.7554/eLife.54572 (PMC7486118; doi:10.7554/eLife.54572)
Supplement: Figure 4—source data 1. — wt = ryr1b+/+, gbt348hom = ryr1bmn0348Gt/mn0348Gt, peak = peak ∆F/F0, num = number of transients/responses, totcell = number of cells, width = peak width at half max, rise = 10–90% rise time, and decay = 90–50% decay time. [file elife-54572-fig4-data1.xlsx]

## Sheet: fish348_panel K
fish	gene	peak	num	totcell
1	wt	0.739718	1	5
2	wt	2.35357	3	5
3	wt	2.13188	2	5
4	wt	0.893558	2	7
5	wt	2.17335	2	5
6	wt	0.166449	1	5
7	wt	4.69235	1	1
8	wt	4.40995	1	6
9	wt	8.28728	1	2
10	wt	0.815919	1	2
11	wt	5.849	2	2
12	wt	3.61666	3	3
13	wt	0.899931	4	3
14	wt	7.40172	1	2
15	wt	4.10855	1	2
16	wt	6.46959	1	4
17	wt	1.34826	9	2
18	wt	4.602	2	2
19	wt	5.34962	3	2
20	gbt348hom	0.436875	1	2
21	gbt348hom	0.0284787	1	7
22	gbt348hom	0.0048817	1	8
23	gbt348hom	0.02115	1	5
24	gbt348hom	0.0441799	1	5
25	gbt348hom	0	1	1
26	gbt348hom	0.411903	1	1
27	gbt348hom	0.089485	1	1
28	gbt348hom	0.781823	3	3
29	gbt348hom	0.268338	8	2
30	gbt348hom	0.0641512	2	2
31	gbt348hom	0	1	4
32	gbt348hom	0.00918017	1	1
33	gbt348hom	0.265285	4	2
34	gbt348hom	0.0384145	4	2
35	gbt348hom	0.055048	4	2

## Sheet: fish348WT_panel K
fish	gene	peak	num	totcell
1	wt	0.739718	1	5
2	wt	2.35357	3	5
3	wt	2.13188	2	5
4	wt	0.893558	2	7
5	wt	2.17335	2	5
6	wt	0.166449	1	5
7	wt	4.69235	1	1
8	wt	4.40995	1	6
9	wt	8.28728	1	2
10	wt	0.815919	1	2
11	wt	5.849	2	2
12	wt	3.61666	3	3
13	wt	0.899931	4	3
14	wt	7.40172	1	2
15	wt	4.10855	1	2
16	wt	6.46959	1	4
17	wt	1.34826	9	2
18	wt	4.602	2	2
19	wt	5.34962	3	2

## Sheet: fish348GBT_panel K
fish	gene	peak	num	totcell
20	gbt348hom	0.436875	1	2
21	gbt348hom	0.0284787	1	7
22	gbt348hom	0.0048817	1	8
23	gbt348hom	0.02115	1	5
24	gbt348hom	0.0441799	1	5
25	gbt348hom	0	1	1
26	gbt348hom	0.411903	1	1
27	gbt348hom	0.089485	1	1
28	gbt348hom	0.781823	3	3
29	gbt348hom	0.268338	8	2
30	gbt348hom	0.0641512	2	2
31	gbt348hom	0	1	4
32	gbt348hom	0.00918017	1	1
33	gbt348hom	0.265285	4	2
34	gbt348hom	0.0384145	4	2
35	gbt348hom	0.055048	4	2

## Sheet: fish348x_panel K
fish	gene	peak	num	totcell
1	wt	0.739718	1	5
2	wt	2.35357	3	5
3	wt	2.13188	2	5
4	wt	0.893558	2	7
5	wt	2.17335	2	5
6	wt	0.166449	1	5
7	wt	4.69235	1	1
8	wt	4.40995	1	6
9	wt	8.28728	1	2
10	wt	0.815919	1	2
11	wt	5.849	2	2
12	wt	3.61666	3	3
13	wt	0.899931	4	3
14	wt	7.40172	1	2
15	wt	4.10855	1	2
16	wt	6.46959	1	4
17	wt	1.34826	9	2
18	wt	4.602	2	2
19	wt	5.34962	3	2
20	gbt348hom	0.436875	1	2
21	gbt348hom	0.0284787	1	7
22	gbt348hom	0.0048817	1	8
23	gbt348hom	0.02115	1	5
24	gbt348hom	0.0441799	1	5
25	gbt348hom	0	1	1
26	gbt348hom	0.411903	1	1
27	gbt348hom	0.089485	1	1
29	gbt348hom	0.268338	8	2
30	gbt348hom	0.0641512	2	2
31	gbt348hom	0	1	4
32	gbt348hom	0.00918017	1	1
33	gbt348hom	0.265285	4	2
34	gbt348hom	0.0384145	4	2
35	gbt348hom	0.055048	4	2

## Sheet: 348kin_panel L_M_N
cell	gene	peak	width	rise	decay
1	wt	4.69235	7.07957	0.511704	4.92092
2	wt	5.37273	2.94941	0.581831	1.52318
3	wt	7.56904	2.53049	0.398897	1.12868
4	wt	4.6807	3.2056	0.524144	1.84668
5	wt	3.95361	2.8455	0.610775	1.34736
6	wt	12.2558	3.09968	0.552142	1.66903
7	wt	3.17791	3.3924	0.504622	1.91862
8	wt	8.42028	4.28004	0.658155	2.27241
9	wt	8.15427	4.2172	0.609278	2.47247
10	wt	1.41314	1.91587	1.15858	0.796096
11	wt	0.218703	6.3162	2.46074	3.43752
12	wt	4.48982	6.80465	0.982304	3.71274
13	wt	8.10135	3.97555	0.696803	2.21601
14	wt	6.15369	3.71508	0.675901	2.03158
15	wt	3.29405	3.98587	0.877321	2.08522
16	wt	2.44306	3.51036	0.891434	1.7645
17	wt	1.24299	1.20572	0.622378	0.621635
18	wt	1.93904	1.15682	0.612976	0.525663
19	wt	1.38944	1.09839	0.609585	0.48799
20	wt	7.58824	3.47187	0.575789	1.98612
21	wt	7.21519	4.74273	0.727405	2.31567
22	wt	4.39232	5.31585	0.687563	2.16577
23	wt	4.4904	16.5858	3.73092	5.54143
24	wt	6.93849	9.41783	0.765687	4.00581
25	wt	7.27604	6.10482	0.595309	4.18045
26	wt	7.17343	7.23612	0.639809	4.16578
27	wt	1.23361	1.94939	0.716562	0.953408
28	wt	2.05805	1.97086	0.681303	0.975655
29	wt	3.43058	6.87101	0.680003	4.98567
30	wt	4.68863	10.3974	0.806738	7.48504
31	wt	5.57013	8.56309	0.718091	3.65936
32	wt	8.74802	8.28245	0.692273	5.24826
33	gbt348hom	0.411903	9.12472	2.70921	4.7437
34	gbt348hom	0.0894855	7.88968	1.41122	5.15669
35	gbt348hom	0.268879	4.13788	1.55069	2.11611
36	gbt348hom	1.81724	5.09926	1.4935	2.21391
37	gbt348hom	0.15953	1.32259	3.56051	0.571451
38	gbt348hom	0.0413728	3.84778	3.68998	0.62139
39	gbt348hom	0.717189	5.63551	3.51795	2.33074
40	gbt348hom	0.0969146	2.69904	0.775488	1.26781
41	gbt348hom	0.00918017	17.9622	22.9649	8.42223
42	gbt348hom	0.587576	4.61841	1.53754	1.94456
43	gbt348hom	0.0846837	3.01955	1.15207	1.02246
44	gbt348hom	0.142654	4.40018	1.56484	1.87778
45	gbt348hom	0.0109926	3.12474	1.05701	1.70776
46	gbt348hom	0.0694821	4.77683	1.51873	2.53332
47	gbt348hom	0.0578947	4.45908	2.53719	0.743386
48	gbt348hom	0.0526397	22.6	5.00193

## Sheet: 348kinWT_panel_L_M_N
cell	gene	peak	width	rise	decay
1	wt	4.69235	7.07957	0.511704	4.92092
2	wt	5.37273	2.94941	0.581831	1.52318
3	wt	7.56904	2.53049	0.398897	1.12868
4	wt	4.6807	3.2056	0.524144	1.84668
5	wt	3.95361	2.8455	0.610775	1.34736
6	wt	12.2558	3.09968	0.552142	1.66903
7	wt	3.17791	3.3924	0.504622	1.91862
8	wt	8.42028	4.28004	0.658155	2.27241
9	wt	8.15427	4.2172	0.609278	2.47247
10	wt	1.41314	1.91587	1.15858	0.796096
11	wt	0.218703	6.3162	2.46074	3.43752
12	wt	4.48982	6.80465	0.982304	3.71274
13	wt	8.10135	3.97555	0.696803	2.21601
14	wt	6.15369	3.71508	0.675901	2.03158
15	wt	3.29405	3.98587	0.877321	2.08522
16	wt	2.44306	3.51036	0.891434	1.7645
17	wt	1.24299	1.20572	0.622378	0.621635
18	wt	1.93904	1.15682	0.612976	0.525663
19	wt	1.38944	1.09839	0.609585	0.48799
20	wt	7.58824	3.47187	0.575789	1.98612
21	wt	7.21519	4.74273	0.727405	2.31567
22	wt	4.39232	5.31585	0.687563	2.16577
23	wt	4.4904	16.5858	3.73092	5.54143
24	wt	6.93849	9.41783	0.765687	4.00581
25	wt	7.27604	6.10482	0.595309	4.18045
26	wt	7.17343	7.23612	0.639809	4.16578
27	wt	1.23361	1.94939	0.716562	0.953408
28	wt	2.05805	1.97086	0.681303	0.975655
29	wt	3.43058	6.87101	0.680003	4.98567
30	wt	4.68863	10.3974	0.806738	7.48504
31	wt	5.57013	8.56309	0.718091	3.65936
32	wt	8.74802	8.28245	0.692273	5.24826

## Sheet: 348kinGBT_panel_L_M_N
cell	gene	peak	width	rise	decay
33	gbt348hom	0.411903	9.12472	2.70921	4.7437
34	gbt348hom	0.0894855	7.88968	1.41122	5.15669
35	gbt348hom	0.268879	4.13788	1.55069	2.11611
36	gbt348hom	1.81724	5.09926	1.4935	2.21391
37	gbt348hom	0.15953	1.32259	3.56051	0.571451
38	gbt348hom	0.0413728	3.84778	3.68998	0.62139
39	gbt348hom	0.717189	5.63551	3.51795	2.33074
40	gbt348hom	0.0969146	2.69904	0.775488	1.26781
41	gbt348hom	0.00918017	17.9622	22.9649	8.42223
42	gbt348hom	0.587576	4.61841	1.53754	1.94456
43	gbt348hom	0.0846837	3.01955	1.15207	1.02246
44	gbt348hom	0.142654	4.40018	1.56484	1.87778
45	gbt348hom	0.0109926	3.12474	1.05701	1.70776
46	gbt348hom	0.0694821	4.77683	1.51873	2.53332
47	gbt348hom	0.0578947	4.45908	2.53719	0.743386
48	gbt348hom	0.0526397	22.6	5.00193

## Sheet: 348kinx_panel L
cell	gene	peak	width	rise	decay
1	wt	4.69235	7.07957	0.511704	4.92092
2	wt	5.37273	2.94941	0.581831	1.52318
3	wt	7.56904	2.53049	0.398897	1.12868
4	wt	4.6807	3.2056	0.524144	1.84668
5	wt	3.95361	2.8455	0.610775	1.34736
6	wt	12.2558	3.09968	0.552142	1.66903
7	wt	3.17791	3.3924	0.504622	1.91862
8	wt	8.42028	4.28004	0.658155	2.27241
9	wt	8.15427	4.2172	0.609278	2.47247
10	wt	1.41314	1.91587	1.15858	0.796096
11	wt	0.218703	6.3162	2.46074	3.43752
12	wt	4.48982	6.80465	0.982304	3.71274
13	wt	8.10135	3.97555	0.696803	2.21601
14	wt	6.15369	3.71508	0.675901	2.03158
15	wt	3.29405	3.98587	0.877321	2.08522
16	wt	2.44306	3.51036	0.891434	1.7645
17	wt	1.24299	1.20572	0.622378	0.621635
18	wt	1.93904	1.15682	0.612976	0.525663
19	wt	1.38944	1.09839	0.609585	0.48799
20	wt	7.58824	3.47187	0.575789	1.98612
21	wt	7.21519	4.74273	0.727405	2.31567
22	wt	4.39232	5.31585	0.687563	2.16577
24	wt	6.93849	9.41783	0.765687	4.00581
25	wt	7.27604	6.10482	0.595309	4.18045
26	wt	7.17343	7.23612	0.639809	4.16578
27	wt	1.23361	1.94939	0.716562	0.953408
28	wt	2.05805	1.97086	0.681303	0.975655
29	wt	3.43058	6.87101	0.680003	4.98567
30	wt	4.68863	10.3974	0.806738	7.48504
31	wt	5.57013	8.56309	0.718091	3.65936
32	wt	8.74802	8.28245	0.692273	5.24826
33	gbt348hom	0.411903	9.12472	2.70921	4.7437
34	gbt348hom	0.0894855	7.88968	1.41122	5.15669
35	gbt348hom	0.268879	4.13788	1.55069	2.11611
36	gbt348hom	1.81724	5.09926	1.4935	2.21391
37	gbt348hom	0.15953	1.32259	3.56051	0.571451
38	gbt348hom	0.0413728	3.84778	3.68998	0.62139
39	gbt348hom	0.717189	5.63551	3.51795	2.33074
40	gbt348hom	0.0969146	2.69904	0.775488	1.26781
41	gbt348hom	0.00918017	17.9622	22.9649	8.42223
42	gbt348hom	0.587576	4.61841	1.53754	1.94456
43	gbt348hom	0.0846837	3.01955	1.15207	1.02246
44	gbt348hom	0.142654	4.40018	1.56484	1.87778
45	gbt348hom	0.0109926	3.12474	1.05701	1.70776
46	gbt348hom	0.0694821	4.77683	1.51873	2.53332
47	gbt348hom	0.0578947	4.45908	2.53719	0.743386

## Sheet: 348kinxr_panel M
cell	gene	peak	width	rise	decay
1	wt	4.69235	7.07957	0.511704	4.92092
2	wt	5.37273	2.94941	0.581831	1.52318
3	wt	7.56904	2.53049	0.398897	1.12868
4	wt	4.6807	3.2056	0.524144	1.84668
5	wt	3.95361	2.8455	0.610775	1.34736
6	wt	12.2558	3.09968	0.552142	1.66903
7	wt	3.17791	3.3924	0.504622	1.91862
8	wt	8.42028	4.28004	0.658155	2.27241
9	wt	8.15427	4.2172	0.609278	2.47247
10	wt	1.41314	1.91587	1.15858	0.796096
11	wt	0.218703	6.3162	2.46074	3.43752
12	wt	4.48982	6.80465	0.982304	3.71274
13	wt	8.10135	3.97555	0.696803	2.21601
14	wt	6.15369	3.71508	0.675901	2.03158
15	wt	3.29405	3.98587	0.877321	2.08522
16	wt	2.44306	3.51036	0.891434	1.7645
17	wt	1.24299	1.20572	0.622378	0.621635
18	wt	1.93904	1.15682	0.612976	0.525663
19	wt	1.38944	1.09839	0.609585	0.48799
20	wt	7.58824	3.47187	0.575789	1.98612
21	wt	7.21519	4.74273	0.727405	2.31567
22	wt	4.39232	5.31585	0.687563	2.16577
24	wt	6.93849	9.41783	0.765687	4.00581
25	wt	7.27604	6.10482	0.595309	4.18045
26	wt	7.17343	7.23612	0.639809	4.16578
27	wt	1.23361	1.94939	0.716562	0.953408
28	wt	2.05805	1.97086	0.681303	0.975655
29	wt	3.43058	6.87101	0.680003	4.98567
30	wt	4.68863	10.3974	0.806738	7.48504
31	wt	5.57013	8.56309	0.718091	3.65936
32	wt	8.74802	8.28245	0.692273	5.24826
33	gbt348hom	0.411903	9.12472	2.70921	4.7437
34	gbt348hom	0.0894855	7.88968	1.41122	5.15669
35	gbt348hom	0.268879	4.13788	1.55069	2.11611
36	gbt348hom	1.81724	5.09926	1.4935	2.21391
37	gbt348hom	0.15953	1.32259	3.56051	0.571451
38	gbt348hom	0.0413728	3.84778	3.68998	0.62139
39	gbt348hom	0.717189	5.63551	3.51795	2.33074
40	gbt348hom	0.0969146	2.69904	0.775488	1.26781
42	gbt348hom	0.587576	4.61841	1.53754	1.94456
43	gbt348hom	0.0846837	3.01955	1.15207	1.02246
44	gbt348hom	0.142654	4.40018	1.56484	1.87778
45	gbt348hom	0.0109926	3.12474	1.05701	1.70776
46	gbt348hom	0.0694821	4.77683	1.51873	2.53332
47	gbt348hom	0.0578947	4.45908	2.53719	0.743386
48	gbt348hom	0.0526397	22.6	5.00193

## Sheet: 348kinxd_panel N
cell	gene	peak	width	rise	decay
1	wt	4.69235	7.07957	0.511704	4.92092
2	wt	5.37273	2.94941	0.581831	1.52318
3	wt	7.56904	2.53049	0.398897	1.12868
4	wt	4.6807	3.2056	0.524144	1.84668
5	wt	3.95361	2.8455	0.610775	1.34736
6	wt	12.2558	3.09968	0.552142	1.66903
7	wt	3.17791	3.3924	0.504622	1.91862
8	wt	8.42028	4.28004	0.658155	2.27241
9	wt	8.15427	4.2172	0.609278	2.47247
10	wt	1.41314	1.91587	1.15858	0.796096
11	wt	0.218703	6.3162	2.46074	3.43752
12	wt	4.48982	6.80465	0.982304	3.71274
13	wt	8.10135	3.97555	0.696803	2.21601
14	wt	6.15369	3.71508	0.675901	2.03158
15	wt	3.29405	3.98587	0.877321	2.08522
16	wt	2.44306	3.51036	0.891434	1.7645
17	wt	1.24299	1.20572	0.622378	0.621635
18	wt	1.93904	1.15682	0.612976	0.525663
19	wt	1.38944	1.09839	0.609585	0.48799
20	wt	7.58824	3.47187	0.575789	1.98612
21	wt	7.21519	4.74273	0.727405	2.31567
22	wt	4.39232	5.31585	0.687563	2.16577
23	wt	4.4904	16.5858	3.73092	5.54143
24	wt	6.93849	9.41783	0.765687	4.00581
25	wt	7.27604	6.10482	0.595309	4.18045
26	wt	7.17343	7.23612	0.639809	4.16578
27	wt	1.23361	1.94939	0.716562	0.953408
28	wt	2.05805	1.97086	0.681303	0.975655
29	wt	3.43058	6.87101	0.680003	4.98567
31	wt	5.57013	8.56309	0.718091	3.65936
32	wt	8.74802	8.28245	0.692273	5.24826
33	gbt348hom	0.411903	9.12472	2.70921	4.7437
34	gbt348hom	0.0894855	7.88968	1.41122	5.15669
35	gbt348hom	0.268879	4.13788	1.55069	2.11611
36	gbt348hom	1.81724	5.09926	1.4935	2.21391
37	gbt348hom	0.15953	1.32259	3.56051	0.571451
38	gbt348hom	0.0413728	3.84778	3.68998	0.62139
39	gbt348hom	0.717189	5.63551	3.51795	2.33074
40	gbt348hom	0.0969146	2.69904	0.775488	1.26781
42	gbt348hom	0.587576	4.61841	1.53754	1.94456
43	gbt348hom	0.0846837	3.01955	1.15207	1.02246
44	gbt348hom	0.142654	4.40018	1.56484	1.87778
45	gbt348hom	0.0109926	3.12474	1.05701	1.70776
46	gbt348hom	0.0694821	4.77683	1.51873	2.53332
47	gbt348hom	0.0578947	4.45908	2.53719	0.743386
48	gbt348hom	0.0526397	22.6	5.00193

[truncated: 1 more sheets: dataset2xy_power analysis_K]
