# Supplementary material for: Building the vertebrate codex using the gene breaking protein trap library
Source: eLife. 2020 Aug 11;9:e54572. doi: 10.7554/eLife.54572 (PMC7486118; doi:10.7554/eLife.54572)
Supplement: Figure 4—source data 2. [file elife-54572-fig4-data2.xlsx]

## Sheet: dF_F0_WT
Fish Number	1						2																3											4															5
Cell Number	1	2	3	4	5		6	6	6	7	7	7	8	8	8	9	9	9	10	10	10		11	11	12	12	13	13	14	14	15	15		16	16	17	17	18	18	19	19	20	20	21	21	22	22		23
	df/f0 c1	df/f0 c2	df/f0 c3	df/f0 c4	df/f0 c5		c1 p1	c1 p2	c1 p3	c2 p1	c2 p2	c2 p3	c3 p1	c3 p2	c3 p3	c4 p1	c4 p2	c4 p3	c5 p1	c5 p2	c5 p3		df/f0 c1 p1	df/f0 c1 p2	df/f0 c2 p1	df/f0 c2 p2	df/f0 c3 p1	df/f0 c3 p2	df/f0 c4 p1	df/f0 c4 p2	df/f0 c5 p1	df/f0 c5 p2		df/f0 c1 p1	df/f0 c1 p2	df/f0 c2 p1	df/f0 c2 p2	df/f0 c3 p1	df/f0 c3 p2	df/f0 c4 p1	df/f0 c4 p2	df/f0 c5 p1	df/f0 c5 p2	df/f0 c6 p1	df/f0 c6 p2	df/f0 c7 p1	df/f0 c7 p2		c1 df/f0 p1
	0	0	0	0	0		0	0	0	0	0	0	0	0	0	0	0	0	0	0	0		0	0	0	0	0	0	0	0	0	0		0	0	0	0	0	0	0	0	0	0	0	0	0	0		0
	-0.0075505	-0.00549724	-0.00468957	-0.0507791	-0.0108035		-0.00648045	-0.000437493	0.130642	0.0345204	-0.0341873	-0.141007	-0.050236	0.00399549	-0.0568623	0.0253966	-0.018032	0.0126003	0.0227576	-0.0074149	-0.026941		0.0086322	0.00645902	-0.00373134	-0.00495839	0.0310581	0.000482167	-0.00868766	-0.0116566	0.070358	0.00704349		0.0113468	-0.0193154	-0.0117238	0.00460951	-0.0293264	-0.00959718	-0.0145542	0.00850514	-0.0139888	0.00708239	-0.0731268	0.0178612	-0.00562379	0.000972245		-0.0111373
	0.00036411	-0.00681558	-0.00634999	-0.0461824	-0.00536204		0.0155307	0.119108	-0.0157798	-0.00125987	-0.140176	-0.134805	-0.0131888	-0.000705086	-0.050847	-0.0158879	-0.0450927	-0.0306958	-0.0431522	-0.0269151	-0.0220089		0.00348732	-0.0211095	-0.00348781	-0.00609934	0.00957894	0.00488863	-0.00978331	-0.0198063	0.0182507	-0.182779		-0.0141224	0.026825	-0.0109046	0.0114534	-0.00988443	0.0175823	-0.0269826	0.0215156	-0.0177633	0.0185432	-0.0591106	-0.0121915	-0.0115322	-0.0120824		-0.0273071
	0.341765	0.70703	0.428456	0.148884	0.781586		0.0255866	-0.0896861	0.049419	-0.101125	-0.294958	-0.0493433	-0.0554862	-0.057159	-0.0413871	-0.0556559	-0.0395229	0.0368849	-0.0301551	-0.077086	-0.0275244		0.0419124	-0.0259114	-0.00146123	-0.00649395	0.0184527	0.00608066	-0.00723788	-0.00612721	0.0125198	-0.0817045		-0.0237409	0.0277358	-0.00145018	0.0178747	-0.0254418	0.0209189	-0.017816	0.0183585	0.00230304	0.0197288	-0.0526919	-0.0560417	-0.00782328	0.006706		-0.0417349
	0.45784	0.877295	0.688761	0.126376	1.30135		-0.0774302	-0.0454993	-0.0549235	0.0198219	-0.11064	-0.130974	-0.048733	-0.0690984	-0.0499473	-0.0111697	-0.0674737	0.0397991	-0.0161307	-0.0810824	-0.0319262		0.0277264	0.0338393	-0.00299203	-0.00941923	0.0112391	0.0136614	-0.0148742	-0.0189894	0.0702698	-0.232905		-0.00816968	0.028784	-0.0126843	-0.00247843	-0.0484606	0.0280418	-0.023271	0.0388967	-0.00442483	0.0246584	-0.166394	-0.0149444	-0.0132659	0.00961443		-0.0360472
	0.336744	0.712029	0.518388	0.251133	1.42356		-0.0512849	-0.0839987	-0.036208	-0.0705527	-0.103052	-0.0788946	-0.081885	-0.0557958	-0.0463227	-0.0371681	0.0078588	-0.0300575	0.0135107	-0.0996678	0.00763683		0.0189435	0.268944	-0.00696691	-0.0311144	-0.00132225	0.0232511	-0.0220124	0.00690432	-0.0439076	0.0748958		-0.00825696	0.0176141	-0.0259054	0.0332147	-0.0266149	0.0474236	-0.0141381	0.0226616	-0.0109181	0.031148	-0.0453563	0.0247763	-0.0058653	0.0108526		-0.0278431
	0.110862	0.353564	0.232459	-0.108442	0.791357		0.742346	0.866893	0.152661	0.644549	0.801322	0.0238052	0.253128	0.460374	-0.0121591	0.316507	0.428775	0.0651661	0.972002	0.479753	-0.0355325		-0.0474663	2.29034	-0.00979369	0.430943	-0.0202157	0.760296	-0.0225769	0.584934	0.101658	3.85261		-0.0641005	0.0405038	-0.0362921	0.0278542	-0.0527682	0.0755216	-0.0351033	0.0483119	-0.0158014	0.0247624	-0.114291	-0.00294956	-0.0157673	0.0133538		-0.0710074
	0.0200452	0.173126	0.0936119	-0.296387	0.386384		0.263911	0.331073	-0.0715596	0.219721	0.148825	-0.0820868	0.0553168	0.191619	-0.0566309	0.0905371	0.130853	0.0256446	0.257269	0.154268	-0.0328277		-0.0281999	2.15671	-0.00207007	0.395616	-0.0183058	0.804361	-0.00918568	0.668553	0.0727385	3.3179		0.47344	0.0532032	0.159209	0.0358715	1.32838	0.0542278	0.584092	0.0534801	0.654565	0.0292864	0.775904	-0.0320191	0.49755	0.0118913		-0.0169739
	0.0130888	0.146585	0.0718469	-0.321399	0.351511		0.19162	0.037515	0.0364526	0.0661011	0.108518	-0.0113097	-0.0342105	0.101485	0.00226215	0.0286464	0.0815636	0.0260331	0.14158	0.0108335	0.0396691		0.829509	1.07702	0.223698	0.287064	0.283666	0.44891	0.297317	0.429781	0.580321	0.966367		0.800436	0.063153	0.367516	0.0369042	1.56078	0.0848751	0.751532	0.0733554	0.72002	0.0363271	1.29588	-0.0217612	0.565321	0.0197607		-0.0466037
	0.0177264	0.122606	0.0334328	-0.357827	0.280534		-0.0432402	0.0871705	0.0725382	0.0227616	-0.110069	-0.0403138	-0.0203019	0.0487449	0.0183029	0.00575335	-0.0272387	-0.000610585	0.0788041	-0.0241225	-0.00795503		2.91691	0.540957	0.495677	0.190186	0.979535	0.276295	0.760752	0.283386	8.11911	0.454834		0.802496	0.0517941	0.393101	0.0343319	1.5586	0.0820634	0.832582	0.0630751	0.777671	0.0458951	1.31379	0.0294629	0.654137	0.0163952		-0.093535
	0.0218466	0.114049	0.00109947	-0.447775	0.217143		-0.0212291	-0.0260308	-0.0108869	-0.0973459	-0.033045	-0.0391281	-0.0948409	-0.0154179	-0.0637516	-0.00337016	0.00658715	0.0610308	0.0258913	-0.0558043	0.104052		2.37379	0.3663	0.431818	0.133482	0.877736	0.240963	0.743797	0.197196	6.41853	0.430005		0.793524	0.057001	0.394165	0.0369512	1.41259	0.0880991	0.729206	0.0755351	0.76686	0.0556191	1.12091	0.0880936	0.675105	0.0302892		0.403308
	0.0118432	0.104074	-0.0269482	-0.489792	0.158637			-0.0542492	-0.0392661		-0.124347	0.0425939		0.016358	-0.0346007		-0.0300872	0.0227582		-0.115557	0.0967862		1.0807	0.242129	0.24993	0.0797203	0.557988	0.165986	0.441997	0.122534	1.31247	0.253977		0.415676	0.0637545	0.314877	0.0452595	0.493817	0.101202	0.290713	0.0500646	0.356161	0.0691287	0.219904	0.0781634	0.338031	0.020816		1.03618
									6.65627			7.83574			2.06033			2.55436			3.71314		0.737181	0.204184	0.191534	0.069958	0.498751	0.136158	0.314936	0.0942394	1.11603	0.263133		0.151663	0.0816951	0.18567	0.0657817	0.156305	0.121089	0.0942312	0.055098	0.14362	0.0722695	-0.074273	0.0183201	0.12575	0.028004		0.53027
									4.12367			4.0425			1.48058			1.73126			2.64446		0.542063	0.206143	0.148758	0.0579309	0.41304	0.11876	0.26478	0.090045	0.815729	0.250572		0.0589509	0.08905	0.118086	0.086041	0.0948251	0.153105	0.0534929	0.0903432	0.0709571	0.0803295	-0.0914658	0.0292662	0.0756624	0.0355908		1.35898
									3.81933			1.89411			1.26274			1.02589			2.65868		0.449972	0.184977	0.120595	0.0342369	0.355523	0.0934198	0.201288	0.0657255	0.826045	0.226272		0.0297286	0.114569	0.0753244	0.111032	0.0172881	0.158522	0.024092	0.0883883	0.0515092	0.0999646	-0.0347131	0.0359519	0.0445591	0.0467841		1.47025
									2.03914			1.18816			0.600422			0.506869			1.78765		0.395703	0.142588	0.0988676	0.0239856	0.320072	0.0806424	0.17693	0.0568186	0.767325	0.0843458		-0.0125513	0.195697	0.038053	0.156385	0.0158458	0.220267	0.0115961	0.137891	0.0232437	0.151736	-0.0640555	0.123783	0.0308101	0.0999003		1.29433
									1.2608			0.848231			0.176808			0.347007			1.32096		0.332738		0.0843858		0.294861		0.137785		0.734703			-0.00607489	0.329977	0.00604554	0.243534	-0.00617296	0.364318	0.00384663	0.235594	0.00629072	0.237931	-0.0804297	0.268672	0.026161	0.202618		0.681099
									1.26165			0.817038			0.179481			0.313674			1.19808		0.321156		0.0695561		0.26276		0.134188		0.66364			-0.0200925	0.650553	-0.0333352	0.365296	-0.0170958	0.966504	-0.00608487	0.577159	-0.0130399	0.579809	-0.0823946	0.896077	0.0110147	0.477298		0.374423
									0.953517			0.647209			0.148942			0.29927			0.939966		0.249064		0.057988		0.253724		0.130392		0.625639			-0.035559	0.68683	-0.0337966	0.325923	-0.0356724	1.45917	-0.0106401	0.750239	-0.0159614	0.761206	-0.120939	1.37964	0.01186	0.68417		0.220333
									0.622997			0.619208			0.098198			0.250673			1.02758		0.263185		0.0595797		0.24441		0.12819		0.767589			-0.0503099	0.680523	-0.0396727	0.285264	-0.0459222	1.51705	-0.00893048	0.759036	-0.0188615	0.750224	-0.144485	1.36938	-0.00778878	0.572004		0.133319
									0.423976			0.509303			0.0519524			0.211956			1.08395		0.261893		0.0532304		0.232186		0.120222		0.648298			-0.0455442		-0.0333258		-0.0764601		-0.0473743		-0.0303874		-0.0932997		0.00451974			0.0667044
									1.68428			1.03958			0.427187			0.494463			1.2832		0.196022		0.035139		0.187832		0.108889		0.618233			-0.0645893		-0.0319321		-0.098325		-0.0303006		-0.0447387		-0.100275		-0.000293265			0.0501325
									0.599633			0.526906			0.207295			0.312065			0.636402		0.224825		0.0337213		0.183396		0.0994821		0.426732			-0.0630881		-0.0604648		-0.0991519		-0.0329325		-0.0473296		-0.149004		-0.0103247			0.0136238
									0.456147			0.445275			0.170793			0.265355			0.598642		0.192965		0.0369133		0.168954		0.120078		0.654911			-0.0565244		-0.055069		-0.10269		-0.0607588		-0.0468072		-0.159713		-0.0190019			0.0118966
									0.313028			0.377235			0.115653			0.268324			0.530866		0.187777		0.0331385		0.153483		0.0988844		0.469406			-0.0811731		-0.0602388		-0.110152		-0.0644254		-0.0597298		-0.10879		-0.0184067			-0.0189244
									0.247217			0.477654			0.112105			0.226388			0.328596		0.154389		0.0370351		0.145873		0.110106		0.601746			-0.0875098		-0.0675556		-0.0889214		-0.0551463		-0.0629285		-0.146647		-0.0231335
																							0.203492		0.0221619		0.140951		0.106897		0.342797
																							0.191372		0.01623		0.121323		0.0997255		0.441368
																							0.161687		0.0267022		0.141539		0.102127		0.53271
																							0.121389		0.00515778		0.113698		0.115518		0.380797
[truncated: 100 more columns]

## Sheet: dF_F0_GBT348hom
Fish Number	20			21								22									23						24								25		26		27		28
Cell Number	65	66		67	68	69	70	71	72	73		74	75	76	77	78	79	80	81		82	83	84	85	86		87	88	89	90	91				92		93		94		95	96	97	95	96	97	95	96	97
	c1 dF/F0	c2 dF/F0		c1 dF/F0	c2 df/f0	c3 df/f0	c4 df/f0	c5 df/f0	c6 df/f0	c7 df/f0		df/f0 c1	df/f0 c2	df/f0 c3	df/f0 c4	df/f0 c5	df/f0 c6	df/f0 c7	df/f0 c8		df/f0 c1	df/f0 c2	df/f0 c3	df/f0 c4	df/f0 c5		df/f0 c1	df/f0 c2	df/f0 c3	df/f0 c4	df/f0 c5			Time (s)	c1		c1		c1		p1	p1	p1	p2	p2	p2	p3	p3	p3
	0	0		0	0	0	0	0	0	0		0	0	0	0	0	0	0	0		0	0	0	0	0		0	0	0	0	0			0	0		0		0		0	0	0	0	0	0	0	0	0
	-0.0103472	-0.0247132		-0.0147583	0.0237708	-0.0163309	-0.0456449	-0.0163823	-0.11797	-0.049272		0.00399805	-0.0123641	-0.00360703	-0.00127893	-0.0272236	-0.0136019	-0.00948231	-0.0264855		-0.000683448	-0.000778994	0.00331877	0.0554791	0.0349336		0.029683	0.00434313	-0.0100323	0.00242919	0.000309256			0.4	-0.00519312		-0.00126081		8.88405e-06		-0.0149859	-0.00260917	-0.00723938	-0.00305273	-0.000927399	-0.00133805	-0.00424893	-0.00256844	-0.00348283
	0.00185323	-0.0194419		-0.0264848	0.0261915	-0.00210141	-0.0338487	-0.0039175	-0.084155	-0.0626625		0.00347392	0.00443209	0.0023887	0.0129806	-0.0237696	-0.0124987	-0.00710727	-0.0144058		0.0106902	-0.00793375	-0.00808199	0.0181945	0.013812		0.0434198	0.00640254	0.00188912	0.015682	0.0102151			0.8	-0.00542384		-0.00279882		-0.00081449		-0.0102843	-0.00267209	-0.00447668	-0.00664627	-0.00322352	-0.00324252	-0.00528145	-0.0017533	-0.00107672
	-0.0152892	-0.00868217		-0.00407972	0.00115084	-0.013419	-0.0136442	-0.0450215	-0.0685321	-0.00303345		0.0161507	-0.00262056	-0.00711812	-0.00211476	-0.0077969	-0.00140553	-0.00901802	-0.0103248		0.0120184	-0.00189355	-0.0101283	0.0228251	-0.00687143		-0.0116875	-0.00196766	-0.00364916	0.00126288	-0.00627211			1.2	-0.00652075		-0.00307043		-0.00013717		-0.0165195	-0.00392765	-0.00486017	-0.00641856	-0.00611682	-0.00307835	-0.00560087	-0.00319005	-0.00249512
	-0.0109907	-0.00753488		-0.01701	0.0124211	0.00798535	-0.030122	-0.0124944	-0.123108	0.00325013		-0.0154681	-0.00531148	-0.00923821	-0.00880143	-0.0552487	-0.0307706	-0.00787514	0.00310153		-0.031271	-0.0110497	-0.022578	-0.0173864	-0.0195997		-0.00345821	0.00930816	0.00397771	0.0134757	0.00650405			1.6	-0.00574967		-0.00293854		-0.000876678		-0.0188804	-0.0055271	-0.00778201	-0.00985555	-0.0046015	-0.00279103	-0.00462777	-0.00458907	-0.00392213
	0.109006	0.718698		-0.013666	-0.106988	-0.091081	0.0324011	-0.163081	-0.263713	-0.131565		-0.0168576	-0.0209997	-0.00226398	-0.00329299	-0.0183919	-0.0151586	-0.034197	-0.0497878		-0.043573	-0.0127156	-0.0412009	-0.00729528	0.0163485		-0.0445085	-0.0102053	-0.0118862	-0.00589839	-0.00662002			2	-0.0069923		-0.00347952		-0.000980799		-0.0210731	-0.00514809	-0.00710112	-0.0105102	-0.0059085	-0.00539053	-0.00759163	-0.00671632	-0.00537786
	0.115518	0.758233		-0.0144908	-0.0104766	-0.022335	-0.00754589	-0.0412821	-0.0737398	-0.0399116		-0.0175768	-0.041032	-0.0176418	-0.0134237	-0.0118484	-0.0284281	-0.0271433	-0.0963924		-0.02129	-0.0186599	-0.0297486	-0.0195051	-0.00562627		-0.0223183	-0.0237649	-0.0205925	-0.00609897	-0.00891045			2.4	-0.00708135		-0.00225336		-0.000515275		-0.0213892	-0.00608318	-0.00806637	-0.0118053	-0.00680504	-0.00662186	-0.00556373	-0.0062538	-0.0038159
	0.104476	0.708775		-0.0143348	0.00531767	-0.0138693	-0.0211593	-0.0247811	-0.0974865	-0.0323713		-0.018747	-0.0809385	-0.0311298	-0.0181165	-0.00584403	-0.020146	-0.0450901	-0.0764773		-0.0411487	-0.00979135	-0.0268941	-0.00792871	-0.0328583		0.0321486	-0.015884	-0.00774421	-0.00447951	-0.00927769			2.8	-0.00638313		-0.00213488		-0.001925		-0.0220215	-0.0068251	-0.0080168	-0.00819042	-0.00622484	-0.00453406	-0.0107115	-0.00854342	-0.00562191
	0.0824174	0.623008		-0.00510523	-0.0597246	-0.0471316	0.000215597	-0.0643716	-0.135745	-0.0506587		-0.00967821	-0.0210173	-0.0180735	-0.0165958	-0.0234199	-0.0418033	-0.045358	-0.0340353		-0.0188915	-0.0142017	-0.0402552	0.0165782	-0.0356484		0.0379123	-0.00777889	-0.0147961	-0.0121385	-0.0264414			3.2	-0.00741528		-0.00277758		-0.00284361		-0.0171854	-0.00672559	-0.00823333	-0.00978439	-0.00743925	-0.00498555	-0.0104292	-0.00892721	-0.00707764
	0.0654552	0.550915		-0.0232968	0.0225803	-0.0190628	-0.0303684	-0.0180145	-0.0104847	-0.0519587		-0.00704534	-0.0456752	-0.0255849	-0.0222151	-0.048574	-0.0353499	-0.0559831	-0.085986		-0.0536829	-0.0376074	-0.0529284	-0.0402551	0.00675613		0.0376561	-0.0204311	-0.0124142	-0.00745842	-0.0324043			3.6	-0.00670896		-0.00328392		-0.00265242		-0.0210731	-0.00740752	-0.0087577	-0.0140611	-0.00848393	-0.00761514	-0.00302328	-0.00603075	-0.00390203
	0.0615686	0.455256		-0.0232076	0.00666693	-0.0113476	-0.0240545	0.00189939	-0.0892932	-0.0354047		-0.0206119	-0.05016	-0.0232058	-0.0201708	-0.0203302	-0.0224281	-0.0433043	-0.0397486		-0.032496	-0.0182165	-0.0436427	-0.0216456	-0.0473621		0.0669869	-0.00909406	-0.0073922	-0.0104596	-0.020266			4	-0.00619491		-0.0025898		-0.00263181		-0.0191898	-0.0129024	-0.0120917	-0.00900875	-0.0091274	-0.00763156	-0.0106223	-0.00677044	-0.00656943
	0.0357005	0.340403		-0.00256376	-0.0891702	-0.0630422	0.00372675	-0.129307	-0.146369	-0.0778298		-0.0450512	-0.0700869	-0.0410779	-0.0279048	-0.0107845	-0.0283223	-0.0589296	-0.0628061		-0.0263837	-0.0311717	-0.0370396	-0.0242011	-0.0311289		0.076625	-0.0144873	-0.00747433	-0.00225833	-0.0247985			4.4	-0.00726552		-0.00446649		-0.000283579		-0.0465787	0.30541	-0.0929406	-0.00841813	-0.0102569	-0.00690097	-0.00953782	-0.0064785	-0.00552429
	0.0243237	0.186202		-0.00791421	0.000515893	-0.0221548	-0.0404398	-0.0141861	0.007985	-0.0556856		-0.0286446	-0.0597277	-0.0254794	-0.024219	-0.0732034	-0.0684178	-0.0605904	-0.0232615		-0.0377057	-0.0095996	-0.0354576	-0.0183693	-0.00961538		0.0557157	-0.0251718	-0.026037	-0.00990989	-0.0389856			4.8	-0.00699837		0.0196487		-0.00117198		-0.0170038	0.855739	-0.0807732	-0.00985555	-0.00856262	-0.00861663	-0.0171963	-0.00820063	-0.00973355
	0.0266402	0.0903876		-0.0216916	-0.130918	-0.0699769	-0.0680054	-0.15023	-0.204277	-0.0830733		-0.0318747	-0.0360371	-0.0430541	-0.0197076	-0.0551321	-0.0603926	-0.0738763	-0.130877		-0.048744	-0.0222672	-0.0305052	0.00736081	-0.00724036		0.0163305	-0.0198907	-0.0127779	-0.00815672	-0.0329261			5.2	-0.00914564		0.078016		-0.0011862		0.061948	1.28566	-0.0418136	-0.0101473	-0.00957181	-0.006994	-0.00843844	-0.00899117	-0.00824624
	0.0125093	0.0128372		0.0294721	-0.133339	-0.0798235	0.012135	-0.138893	-0.185183	-0.0680361		-0.0507435	-0.0546801	-0.0330964	-0.0268071	-0.0439541	-0.0372391	-0.0591975	-0.071825		-0.0327023	-0.0216201	-0.0274788	-0.00814713	-0.0508439		-0.0575728	-0.0217462	-0.013482	-0.0095236	-0.0353229			5.6	-0.00721087		0.148352		-0.00264496		0.12816	1.58691	-0.01271	-0.0117128	-0.0110794	-0.00942111	-0.0112537	-0.00921751	-0.00729011
	0.000180176	-0.0203411		-0.00963082	-0.0333347	-0.0389961	-0.0378835	-0.0557946	-0.0979031	-0.0538655		-0.0374573	-0.0347532	-0.024616	-0.0298886	-0.0428465	-0.0568108	-0.0684298	-0.0873735		-0.0352556	-0.0151364	-0.0492314	-0.0114453	-0.0451485		-0.0293948	-0.030514	-0.0209211	-0.0161129	-0.0454317			6	-0.00679599		0.205681		-0.00355007		0.185662	1.7277	0.0220442	-0.0424251	0.284596	-0.107389	-0.00943382	-0.00675076	-0.00714368
	0.0104759	-0.0510388		-0.02187	-0.0371443	-0.0532857	-0.0180793	-0.0653509	-0.158936	-0.0590657		-0.0627986	-0.0555946	-0.0544795	-0.0453264	-0.0367256	-0.0495111	-0.0826265	-0.0856187		-0.0171765	-0.0350188	-0.0616982	-0.0281982	-0.023658		-0.0494076	-0.0400771	-0.0233382	-0.00477666	-0.0457506			6.4	-0.00795969		0.25196		-0.00298078		0.221486	1.7947	0.0508244	0.0139543	0.893469	-0.0889984	-0.00918869	-0.00886324	-0.00886643
	-0.0203084	-0.0705736		-0.016252	-0.0571848	-0.038756	-0.0333251	-0.0711382	-0.100889	-0.0223609		-0.0615066	-0.0818354	-0.0543068	-0.0436044	-0.0347436	-0.0626143	-0.0824836	-0.12047		-0.0134626	-0.0396927	-0.0425594	-0.0192648	-0.0681147		-0.0195325	-0.0358053	-0.0294045	-0.0212015	-0.0541875			6.8	-0.00702266		0.304602		-0.00228853		0.268879	1.81724	0.0834003	0.100541	1.40463	-0.0407436	-0.00768819	-0.00907318	-0.00861376
	-0.0130241	-0.0715349		-0.00735688	-0.139172	-0.131908	0.041179	-0.212494	-0.266213	-0.15449		-0.0649805	-0.0566851	-0.0390825	-0.037824	-0.0653628	-0.0783926	-0.0821443	-0.109125		-0.0595889	-0.0398485	-0.0630395	-0.0390756	-0.0397528		-0.0286904	-0.0433905	-0.0365972	-0.0268399	-0.0579952			7.2	-0.00688706		0.353693		-0.00209166		0.26528	1.77334	0.0949937	0.181442	1.66656	0.000766166	-0.0126502	-0.011517	-0.00912197
	-0.0235773	-0.0816434		-0.0144462	-0.0267868	-0.0363243	-0.0373291	-0.051521	-0.110679	-0.032588		-0.0483179	-0.0706497	-0.0249998	-0.0244708	-0.0717023	-0.0633548	-0.0810014	-0.0634998		-0.0444757	-0.0325979	-0.0794098	-0.0284167	-0.00850858		-0.0413385	-0.038191	-0.0269874	-0.014538	-0.0475868			7.6	-0.00949172		0.369307		-0.00148008		0.245297	1.71164	0.112089	0.227083	1.80413	0.0279733	-0.012524	-0.0103935	-0.00752268
	-0.0315307	-0.0896124		-0.0055511	-0.03266	-0.0277986	-0.00511273	-0.0328535	-0.131093	-0.0284711		-0.0437226	-0.0686623	-0.0425648	-0.0451753	-0.0565603	-0.0624178	-0.0887873	-0.0680705		-0.053425	-0.0385302	-0.0631771	-0.048992	-0.0407443		-0.0560038	-0.0407194	-0.0556879	-0.0213501	-0.0626824			8	-0.00879552		0.379199		-5.75686e-05		0.225091	1.48532	0.115269	0.283214	1.87899	0.0626231	-0.0136382	-0.0122419	-0.00996612
	-0.0262542	-0.0948217		-0.019819	-0.0262709	-0.0399568	-0.0234077	-0.0568927	-0.0960283	-0.0201941		-0.0483788	-0.0625945	-0.0432172	-0.0456184	-0.0514596	-0.0620551	-0.0844837	-0.121041		-0.0482153	-0.0321784	-0.053857	-0.00107027	-0.0510976		0.023471	-0.0382725	-0.0329011	-0.0188169	-0.0468523			8.4	-0.00912136		0.375449		0.0250349		0.182918	1.41335	0.0580351	0.295218	1.87365	0.073084	-0.013601	-0.0135573	-0.0111577
	-0.0342591	-0.096		-0.0160514	-0.0261518	-0.0165711	-0.0293212	-0.0365039	-0.110332	-0.0466719		-0.0640907	-0.0605544	-0.0519182	-0.0440273	-0.0343501	-0.0556017	-0.0755906	-0.0552155		-0.038286	-0.0305365	-0.0771056	-0.0333311	-0.0283619		-0.100192	-0.0514039	-0.0422411	-0.0202878	-0.0713513			8.8	-0.00798802		0.399932		0.0515254		0.176024	1.50353	0.0646901	0.29615	1.82663	0.0915404	-0.00854244	-0.0121665	-0.00987998
	-0.0270778	-0.0771163		-0.00031211	-0.122584	-0.079073	-0.0109646	-0.155275	-0.159839	-0.0819033		-0.0692467	-0.0755039	-0.0475053	-0.0459709	-0.049769	-0.0679039	-0.0992875	-0.0848433		-0.0333213	-0.0210688	-0.0530832	-0.0165564	-0.0135123		0.060935	-0.0523724	-0.0371722	-0.0306954	-0.0587974			9.2	-0.00818838		0.411903		0.06862		0.190821	1.51398	0.101307	0.304946	1.74195	0.10723	-0.0141879	-0.0128438	-0.0110543
	-0.03516	-0.105891		0.0114366	-0.216001	-0.157125	0.0341875	-0.258347	-0.287321	-0.155616		-0.0622867	-0.0730592	-0.0600531	-0.0505327	-0.0890013	-0.0829719	-0.0915016	-0.0877816		-0.0430701	-0.027852	-0.0614403	-0.0521373	-0.032328		-0.0504963	-0.0573782	-0.0434497	-0.0313268	-0.0759611			9.6	-0.00766016		0.406534		0.0820556		0.165027	1.23284	0.15953	0.265922	1.70012	0.0926897	-0.0110903	-0.013554	-0.00995751
	-0.0384803	-0.0849612		-0.00343321	-0.0369459	-0.0397767	-0.0178637	-0.0546965	-0.118178	-0.049662		-0.0649683	-0.0795139	-0.063286	-0.0540372	-0.0838859	-0.0806747	-0.0872694	-0.112145		-0.0553206	-0.0266775	-0.058603	-0.0191556	-0.0423815		0.0537944	-0.0571743	-0.058856	-0.0293954	-0.0741926			10	-0.00816409		0.388649		0.0879787		0.0976371	0.860663	0.10443	0.276155	1.67943	0.126234	-0.0114172	-0.0157452	-0.0129924
	-0.0251731	-0.100031		-0.00231853	-0.025001	-0.0274384	-0.0151226	-0.0509571	-0.106791	-0.0566389		-0.0476719	-0.0733582	-0.0443396	-0.0413385	-0.0630165	-0.0716218	-0.0881801	-0.083823		-0.0334889	-0.0394051	-0.0631599	-0.0247472	-0.0169019		-0.0378482	-0.0569602	-0.0346143	-0.0261862	-0.0754199			10.4	-0.0105967		0.369934		0.0894855		0.0604885	0.604327	0.070085	0.269672	1.64717	0.100866	-0.075894	0.271492	-0.120782
	-0.0365756	-0.0792248		-0.00778045	-0.0335331	-0.0102068	-0.0133054	-0.0398872	-0.15477	-0.026001		-0.0651633	-0.0841043	-0.0528583	-0.0483777	-0.0794992	-0.0825487	-0.0895552	-0.105779		-0.0281245	-0.0379789	-0.0512776	0.0082345	-0.00295148		-0.0694524	-0.0575108	-0.0431329	-0.0282291	-0.0700949			10.8	-0.00764802		0.351024		0.0874738		0.0317004	0.434231	0.0457764	0.239387	1.56088	0.116608	-0.00444207	0.838338	-0.0945073
	-0.0417235	-0.0893023		-0.0167648	-0.0300012	-0.0347633	-0.0311384	-0.0774596	-0.11054	-0.08238		-0.0634812	-0.0952373	-0.0480233	-0.0572093	-0.0765117	-0.0843018	-0.10302	-0.131285		-0.0474158	-0.0418619	-0.0805104	-0.070987	-0.0586146		-0.165418	-0.109557	-0.0991258	-0.110918	-0.0541585			11.2	-0.00834826		0.337829		0.083848		0.0187055	0.320073	0.0315324	0.218594	1.32616	0.182887	0.0609781	1.31636	-0.0600379
	-0.0416206	-0.0943876		-0.0201088	-0.0437319	-0.0516946	-0.0257484	-0.0631548	-0.103527	-0.0528254		-0.0596173	-0.0777551	-0.0531844	-0.0560714	-0.0606701	-0.0736168	-0.0961089	-0.138834		-0.0401816	-0.0431443	-0.0690924	-0.0630147	-0.0629035		-0.345117	-0.231807	-0.146999	-0.149109	-0.114415			11.6	-0.00931767		0.328021		0.0781039		0.00814539	0.24098	0.0192268	0.142617	0.930658	0.132722	0.161965	1.63303	-0.011241
	-0.0388922	-0.096124		-0.00352238	-0.0489702	-0.050704	-0.00163238	-0.0855023	-0.12533	-0.0702895		-0.0689298	-0.0831018	-0.0489731	-0.0447222	-0.0500605	-0.0745538	-0.0972696	-0.141814		-0.0608011	-0.0434079	-0.085394	-0.0444488	-0.0412977		-0.735767	-0.435638	-0.336099	-0.154963	-0.185824			12	-0.00918207		0.319221		0.0727643		-0.000760057	0.190336	0.0134222	0.0968192	0.655818	0.090268	0.220365	1.75659	0.03401
	-0.0460735	-0.0898605		-0.00740146	-0.073614	-0.0603704	-0.0102255	-0.114646	-0.12776	-0.0845901		-0.0761702	-0.0888529	-0.0717856	-0.0621035	-0.0549135	-0.08873	-0.105841	-0.128346		-0.0490922	-0.0451217	-0.0778794	-0.0546054	-0.0565163		-0.689113	-0.399476	-0.363966	-0.221093	-0.183138			12.4	-0.0101515		0.301712		0.0684616		-0.00823956	0.151746	0.00874465	0.0658294	0.469032	0.0618132	0.276649	1.82799	0.0697513
	-0.0530488	-0.109612		-0.0136437	-0.0305568	-0.031281	-0.0183565	-0.0376911	-0.0883211	-0.0543855		-0.071197	-0.0839108	-0.0550167	-0.0635234	-0.0454989	-0.0775009	-0.114466	-0.139773		-0.0318512	-0.0312556	-0.0891426	-0.0580346	-0.0445259		-0.652546	-0.393461	-0.268524	-0.119454	-0.218451			12.8	-0.00961719		0.290057		0.0633952		-0.00705575	0.12025	0.00276531	0.0382908	0.345641	0.0415891	0.350842	1.90087	0.224208
	-0.0491879	-0.106853		0.0126182	0.0443272	0.0126685	0.0245472	-0.00074195	-0.0847105	-0.00892702		-0.0871282	-0.12336	-0.0676317	-0.057743	-0.0507017	-0.0829416	-0.103627	-0.125286		-0.0456878	-0.0527558	-0.0822987	-0.0506957	-0.0607591		-0.601569	-0.375864	-0.346811	-0.211904	-0.196223			13.2	-0.00840695		0.270221		0.0615196		-0.0113067	0.102116	0.00137483	0.0245428	0.265296	0.0308327	0.320371	1.86044	0.0758011
	-0.0450439	-0.105829		0.0316792	-0.0536529	-0.0259974	0.0609523	-0.08111	-0.203722	-0.0465419		-0.0841663	-0.133877	-0.079038	-0.0577028	-0.0448577	-0.0818233	-0.109002	-0.173931		-0.0420127	-0.0420057	-0.0607181	-0.0498001	-0.0477772		-0.63106	-0.381665	-0.241608	-0.117819	-0.179088			13.6	-0.00975279		0.253224		0.0568682		-0.0129613	0.0868283	-0.00159397	0.0170782	0.207234	0.0222818	0.415259	1.96736	0.12067
	-0.0579393	-0.0984186		0.0214464	0.0149212	0.00726487	0.0345571	-0.0395014	-0.0268018	0.0331513		-0.0828011	-0.125893	-0.0716896	-0.0469276	-0.11194	-0.100261	-0.105466	-0.147364		-0.0484861	-0.0361333	-0.0858238	-0.0370006	-0.0673538		-0.540634	-0.265481	-0.174315	-0.126087	-0.155082			14	-0.0102608		0.24163		0.0559851		-0.0164051	0.0727786	-0.00479234	0.0102967	0.165586	0.0182047	0.438361	1.99809	0.170604
	-0.0428046	-0.102078		0.0306982	-0.159173	-0.0615713	0.0604903	-0.193501	-0.240522	-0.042295		-0.103413	-0.121478	-0.0813979	-0.0723752	-0.0931693	-0.11143	-0.123431	-0.156056		-0.0275571	-0.0415623	-0.0807683	-0.0342922	-0.0346569		-0.551073	-0.281182	-0.156151	-0.0970634	-0.155189			14.4	-0.0109205		0.222935		0.0530399		-0.0144814	0.0608801	-0.00554889	0.00631894	0.136073	0.0107482	0.46014	1.96523	0.186356
	-0.0498571	-0.0994729		0.0383672	-0.0509147	-0.047702	0.0523284	-0.0931295	-0.161228	-0.00281678		-0.0732691	-0.12591	-0.0811965	-0.0621136	-0.0988968	-0.101214	-0.131002	-0.10031		-0.0339403	-0.0435158	-0.0920487	-0.0184566	-0.0700978		-0.459238	-0.26907	-0.18545	-0.11773	-0.164244			14.8	-0.0102668		0.219212		0.0505527		-0.0189745	0.0512409	-0.00857508	0.00888778	0.114027	0.00937733	0.420511	1.89986	0.184599
	-0.0498571	-0.0994729		0.0310772	-0.0116671	-0.0065744	0.0445362	-0.0652619	-0.0897098	0.00446351		-0.0741833	-0.114285	-0.0707975	-0.0639363	-0.0775027	-0.0962111	-0.112252	-0.118144		-0.064012	-0.0452415	-0.0887127	-0.0766879	-0.0557554		-0.408549	-0.215301	-0.129586	-0.123198	-0.166689			15.2	-0.00903636		0.202994		0.0515616		-0.0196808	0.0458631	-0.00904988	-0.0449726	0.182455	-0.0777741	0.365267	1.81306	0.17011
	-0.0455072	-0.0992868		0.0191279	-0.0128577	-0.00144097	0.017217	-0.0538952	-0.0845022	0.0259577		-0.0734398	-0.0881846	-0.0805825	-0.0673702	-0.0765117	-0.0962111	-0.126252	-0.147813		-0.0594084	-0.0673889	-0.0911373	-0.0975471	-0.04614		-0.388056	-0.262616	-0.192784	-0.140135	-0.164621			15.6	-0.00823088		0.188878		0.0492088		-0.0227748	0.0357674	-0.0113926	0.00243364	0.704748	-0.0513468	0.330392	1.68779	0.153891
	-0.0551595	-0.0995659		0.0222936	-0.0313901	-0.0221248	0.0384994	-0.106039	-0.0890154	-0.00511354		-0.0799976	-0.0959935	-0.0881611	-0.0611267	-0.0717752	-0.0935965	-0.111913	-0.151118		-0.0601692	-0.0480339	-0.0988926	-0.0805102	-0.0818345		-0.435959	-0.234325	-0.152948	-0.136465	-0.184394			16	-0.0104935		0.180804		0.0463484		-0.0247187	0.0320944	-0.00913336	0.106824	1.10082	0.0759052	0.293139	1.64315	0.147844
	-0.0400247	-0.096062		0.00880596	0.00507957	-0.00603404	0.0223605	-0.0470099	-0.0731148	-0.0113971		-0.0835324	-0.0971016	-0.0844869	-0.0652656	-0.0550592	-0.0908761	-0.124859	-0.094556		-0.0546758	-0.0488369	-0.115057	-0.100758	-0.0578076		-0.27576	-0.211019	-0.125855	-0.12767	-0.172381			16.4	-0.00837457		0.167678		0.0466206		-0.0248532	0.0269828	-0.0127987	0.0663346	0.820324	0.0637423	0.236403	1.44204	0.117271
	-0.0553139	-0.0986977		0.0203763	-0.0134529	-0.0243463	0.0471233	-0.0682297	-0.162269	-0.0358381		-0.0944661	-0.11731	-0.0713251	-0.0681557	-0.057187	-0.0930222	-0.118109	-0.154179		-0.0569712	-0.0473628	-0.100045	-0.110085	-0.0997279		-0.291739	-0.200508	-0.10037	-0.104923	-0.166854			16.8	-0.00895541		0.16		0.0426093		-0.0268643	0.0227713	-0.0140953	0.0455917	0.564325	0.0437262	0.242212	1.38801	0.20033
	-0.0476436	-0.104		0.0187266	-0.0207945	-0.0259674	0.0349883	-0.0683781	-0.131787	-0.0204975		-0.0966602	-0.0979282	-0.0738097	-0.0599686	-0.0717461	-0.0908459	-0.126217	-0.0929236		-0.0509104	-0.0536667	-0.0885236	-0.0891379	-0.0531267		0.168716	-0.111443	-0.0837548	-0.0625943	-0.145814			17.2	-0.0088704		0.165875		0.0396118		-0.0216246	0.0176174	-0.0126291	0.0279727	0.392581	0.0275355	0.162997	1.00952	0.163346
	-0.0473604	-0.100806		0.0138666	-0.000396841	-0.00951638	0.0143834	-0.0362368	-0.0790862	-0.00442018		-0.0836056	-0.0933378	-0.0691187	-0.0561217	-0.0598248	-0.0843472	-0.118824	-0.122266		-0.0553722	-0.0409511	-0.0950579	-0.0549549	-0.0586838		0.0965738	-0.115541	-0.0856791	-0.0691909	-0.142181			17.6	-0.0123352		0.166207		0.039389		-0.0246985	0.0126654	-0.0137744	0.016516	0.283317	0.0190748	0.101551	0.707848	0.111428
	-0.0389694	-0.111132										-0.0973671	-0.0911042	-0.0853407	-0.0603613	-0.0631768	-0.0884429	-0.125252	-0.134141		-0.0864884	-0.0521326	-0.0981016	-0.094664	-0.0751476		0.136599	-0.117723	-0.0876738	-0.0595931	-0.14882			18	-0.00936422		0.16454		0.0362828		-0.0273083	0.0118956	-0.0145622	0.00982708	0.209927	0.0129728	0.0661333	0.508885	0.0785489
												-0.258081	-0.169756	-0.134659	-0.115778	-0.125654	-0.164916	-0.123484	-0.134345		-0.0591118	-0.0482856	-0.11375	-0.0526833	-0.0514204		0.0958694	-0.111688	-0.0919683	-0.0623565	-0.142065			18.4	-0.0100159		0.152178		0.0345678		-0.0293597	0.00843479	-0.0162188	0.000882374	0.160227	0.00763977	0.0361976	0.377054	0.0541088
												-0.266273	-0.22324	-0.142861	-0.141276	-0.123089	-0.187133	-0.127663	-0.137202		-0.0629288	-0.0310279	-0.0782061	-0.0644344	-0.0706973		0.177329	-0.111137	-0.0893048	-0.0562947	-0.140547			18.8	-0.0110582		0.147909		0.0340877		-0.0290907	0.00457446	-0.0175467	-0.00244788	0.123492	0.00424949	0.019811	0.284664	0.0372057
												-0.256485	-0.197879	-0.121229	-0.133159	-0.144906	-0.172427	-0.115145	-0.162096		-0.0608268	-0.03557	-0.0815593	-0.0582312	-0.0567469		0.130419	-0.108425	-0.0826049	-0.0587685	-0.140615			19.2	-0.0114265		0.134179		0.0337878		-0.0305704	0.00273502	-0.0197146	-0.000163666	0.10082	0.00219178	0.0165649	0.223958	0.026315
																					-0.0767138	-0.0469074	-0.0969839	-0.0709215	-0.0663854		0.181716	-0.102604	-0.0942212	-0.0612125	-0.1425			19.6	-0.0111067		0.132158		0.0319549		-0.0324134	9.51182e-05	-0.0185119	-0.00176475	0.0839242	-0.00116293	0.00782933	0.181705	0.0226226
																											0.078162	-0.150103	-0.102928	-0.0652017	-0.174817			20	-0.0125497		0.123654		0.028865		-0.0332407	-0.00208089	-0.0178415	-0.00782039	0.0702972	-0.00115199	0.00670767	0.150726	0.0156024
																											0.087448	-0.157148	-0.107363	-0.0649269	-0.173261			20.4	-0.0119911		0.120025		0.0271593		-0.0309	-0.00292379	-0.0200016	-0.00236248	0.0570204	-0.00661913	-0.000638826	0.126503	0.0135638
																											0.105924	-0.157362	-0.10721	-0.0654097	-0.174817			20.8	-0.0129241		0.111007		0.0286159		-0.032104	-0.00754214	-0.0213816	-0.00719419	0.0481707	-0.00647684	0.000876528	0.105757	0.00878891
																											0.10618	-0.144373	-0.109651	-0.0686709	-0.17387			21.2	-0.0125092		0.106835		0.0238707		-0.0338259	-0.0081831	-0.0208077	-0.00695937	0.0407948	-0.00712534	-0.000378839	0.0924835	0.00753704
																											0.101729	-0.154517	-0.11249	-0.0706395	-0.166883			21.6	-0.0118049		0.106427		0.0229742		-0.0309404	-0.00924842	-0.0216816	-0.0121896	0.0327043	-0.0106251	-0.00814874	0.0782882	0.00171127
																											0.112168	-0.146759	-0.115072	-0.0745099	-0.169762			22	-0.0121227		0.102546		0.0217098		-0.0339873	-0.0111844	-0.0229286	-0.0117626	0.0274254	-0.0115828	-0.00727964	0.0684277	0.00205582
																											0.0416266	-0.150123	-0.116515	-0.0686264	-0.176015			22.4	-0.0148144		0.0911125		0.0210541		-0.0356756	-0.0123449	-0.0215094	-0.0144382	0.0216357	-0.0124995	-0.00832702	0.0597121	-0.000689101
																											0.0852065	-0.154354	-0.118158	-0.0703127	-0.177581			22.8	-0.0109124		0.0746996		0.0242588		-0.0360254	-0.0146248	-0.0231112	-0.013997	0.0186359	-0.0118181	-0.0105332	0.0530893	-0.00102791
																											0.0681716	-0.151704	-0.117125	-0.0732767	-0.179117			23.2	-0.00900398		0.0601433		0.0264677		-0.0349761	-0.0166457	-0.0248383	-0.0159325	0.0145313	-0.0153972	-0.0092184	0.0444474	-0.00416332
																											0.0597502	-0.156353	-0.115752	-0.0677498	-0.171115			23.6	-0.0101818		0.0491738		0.0263853		-0.0359985	-0.0184339	-0.0253078	-0.0181883	0.0103603	-0.0155121	-0.00999094	0.0387775	-0.00553865
																											0.0787384	-0.1494	-0.122933	-0.0713081	-0.177204			24	-0.0104146		0.0425669		0.0284478		-0.039032	-0.0176218	-0.0264922	-0.0195759	0.00778028	-0.0160211	-0.0103921	0.0334291	-0.0060928
																											0.0633686	-0.148808	-0.109041	-0.0665315	-0.176566			24.4	-0.0106352		0.0348209		0.0274627		-0.0380029	-0.0204563	-0.0257252	-0.0195972	0.0041324	-0.0170882	-0.0154655	0.0275033	-0.00843
																											0.101921	-0.150236	-0.114157	-0.0680989	-0.17704			24.8	-0.010279		0.030483		0.0247861		-0.0387495	-0.0207665	-0.0263305	-0.0178111	0.0033624	-0.0161141	-0.0140913	0.0246954	-0.00813713
																											0.0824207	-0.151816	-0.120317	-0.0752528	-0.175967			25.2	-0.0109064		0.0254968		0.0231707		-0.0395297	-0.0227479	-0.0278488	-0.0177684	5.86375e-05	-0.0176218	-0.0126799	0.021302	-0.00858505
																											0.0638489	-0.158402	-0.117008	-0.0662863	-0.179485			25.6	-0.0121186		0.022148		0.0194667		-0.0369132	-0.0228591	-0.0268079	-0.0176048	-0.00155698	-0.0171402	-0.0112166	0.0152483	-0.0106322
																											0.115722	-0.151642	-0.127721	-0.0765825	-0.179697			26	-0.0104793		0.0194665		0.0197183		-0.0403772	-0.0254346	-0.0288793	-0.0142461	-0.00299206	-0.0184591	-0.00953782	0.0142166	-0.0117865
																											0.105155	-0.16667	-0.124212	-0.0721921	-0.181968			26.4	-0.0114649		0.0176368		0.0157091		-0.0427717	-0.026238	-0.0291949	-0.0168007	-0.00597486	-0.0185275	-0.0139502	0.0113185	-0.0112582
																											0.0489593	-0.155201	-0.118592	-0.0644589	-0.175445			26.8	-0.00899183		0.0149643		0.0143236		-0.0418233	-0.0282048	-0.0293358	-0.0218174	-0.00895611	-0.0193813	-0.0175677	0.00637845	-0.0147123
																											0.0893692	-0.155364	-0.126723	-0.0723556	-0.18912			27.2	-0.0115601		0.0120056		0.0152905		-0.0423951	-0.0291457	-0.0311959	-0.0215826	-0.0120207	-0.0229631	-0.0187488	0.00543374	-0.0135724
																											0.0861671	-0.152275	-0.133811	-0.0768202	-0.173184			27.6	-0.012064		0.0123454		0.0119327		-0.0420587	-0.0284696	-0.0304863	-0.0222515	-0.0142412	-0.0229713	-0.0146781	0.00454807	-0.0121511
																											0.143068	-0.146402	-0.12149	-0.0806757	-0.17963			28	-0.0114427		0.0100865		0.0102145		-0.0436999	-0.0306427	-0.0327037				-0.0170997	0.00305884	-0.0130125
																											0.0574768	-0.161042	-0.120047	-0.0716201	-0.180983			28.4	-0.0118211		0.00742291		0.00777283		-0.0439824	-0.0312529	-0.0313341				-0.016602	0.000926672	-0.0140031
																											0.154979	-0.155394	-0.121033	-0.0772659	-0.18049			28.8	-0.0107546		0.00551493		0.00931333		-0.0418032	-0.0311841	-0.0308776				-0.0185334	-0.00234702	-0.0147669
																											0.106052	-0.166201	-0.121772	-0.0763745	-0.180925			29.2	-0.0123919		0.00648401		0.0135045		-0.0463568	-0.0322012	-0.0332385				-0.0174489	-0.00369685	-0.016415
																											0.0978546	-0.154038	-0.12264	-0.0770579	-0.179204			29.6	-0.0129909		0.0037299		0.00852051		-0.0471975	-0.0324061	-0.033896				-0.0237034	-0.00767251	-0.0205094
																											0.0717899	-0.166313	-0.128061	-0.071427	-0.183418			30	-0.0136972		0.00323921		0.00977423		-0.0454622	-0.031888	-0.0321089				-0.0185482	-0.0074511	-0.0164264
																											0.0666026	-0.159432	-0.126066	-0.0765156	-0.180635			30.4	-0.0148488		0.000368854		0.0104871		-0.0444802	-0.0331319	-0.032709				-0.0229012	-0.0102623	-0.0213191
																											0.0931476	-0.155037	-0.124823	-0.0719321	-0.175087			30.8	-0.0138389		0.00102497		0.00819287		-0.0478769	-0.0335709	-0.0333481				-0.0170774	-0.0108888	-0.0179281
																											0.089081	-0.163306	-0.121021	-0.0730093	-0.183379			31.2	-0.0159538		-0.000210135		0.00719324		-0.0493163	-0.0349318	-0.0336586				-0.020695	-0.0121255	-0.0200528
																											0.0925072	-0.165335	-0.119179	-0.0750299	-0.184066			31.6	-0.0147638		-0.00142735		0.00472631		-0.0494844	-0.0348513	-0.0342325				-0.023748	-0.0133834	-0.0200557
																											0.0800192	-0.162235	-0.120739	-0.0756465	-0.183515			32	-0.0157939		-0.0017325		0.00417373		-0.0505606	-0.0373712	-0.0353725				-0.0242605	-0.0135786	-0.0219708
																											0.116202	-0.159115	-0.125796	-0.072311	-0.179369			32.4	-0.0145897		-0.00237855		0.00348397		-0.0521346	-0.0390058	-0.0376552
																											0.0675953	-0.164223	-0.126242	-0.0773848	-0.182374			32.8	-0.0159538		-0.00335657		0.00252591		-0.0529619	-0.0390102	-0.0375404
																											0.117451	-0.161868	-0.117571	-0.0732916	-0.177272			33.2	-0.0170143		-0.00449219		0.000749814		-0.0529888	-0.0403389	-0.0379865
																											0.075056	-0.157545	-0.123649	-0.0705132	-0.181253			33.6	-0.0145351		-0.00542439		0.00153268		-0.052148	-0.0414394	-0.0392361
																											0.0869036	-0.163968	-0.13496	-0.073299	-0.184085			34	-0.0165447		-0.00484316		-0.000310586		-0.0517243	-0.0418374	-0.0392596
																											0.0908101	-0.162052	-0.126946	-0.0808317	-0.188018			34.4	-0.0155976		-0.0069311		-0.000355362		-0.0541793	-0.0421696	-0.0398623
																											0.0761768	-0.169168	-0.128495	-0.0794128	-0.185564			34.8	-0.0148589		-0.00741173		-0.000366023		-0.0569303	-0.0440383	-0.0414771
																											0.110823	-0.166089	-0.119026	-0.0845312	-0.18796			35.2	-0.0176983		-0.0073849		-0.000826927		-0.0542802	-0.0436066	-0.0417145
																											0.0775536	-0.164764	-0.127862	-0.0708104	-0.182635			35.6	-0.0176295		-0.00996688		-0.00312647		-0.0494979	-0.0429539	-0.0400188
																											0.0864233	-0.171931	-0.127944	-0.0692058	-0.180915			36	-0.0178825		-0.0095835		-0.00331197		-0.0559012	-0.0441817	-0.0422284
																											0.100801	-0.165814	-0.123954	-0.0686264	-0.178886			36.4	-0.014954		-0.00986405		-0.00375902		-0.0583966	-0.0455894	-0.0432902
																											0.0463016	-0.164203	-0.131487	-0.0836101	-0.180026			36.8	-0.017081		-0.0108275		-0.0042679		-0.0565335	-0.0460387	-0.0426589
																											0.07496	-0.168587	-0.124377	-0.0724373	-0.184974			37.2	-0.016571		-0.0117296		-0.00384679		-0.0554438	-0.0468948	-0.043838
																											0.105636	-0.171605	-0.125022	-0.0838032	-0.189052			37.6	-0.0156522		-0.0139494		-0.00611045		-0.0559012	-0.0475752	-0.0442972
																											-0.484278	-0.233285	-0.169094	-0.147631	-0.17788			38	-0.018093		-0.011582		-0.00455361		-0.0560223	-0.0488805	-0.0456642
																											-0.445149	-0.328416	-0.216498	-0.17245	-0.198388			38.4	-0.0172187		-0.0135448		-0.00605608		-0.0573742	-0.0488674	-0.0445033
																											-0.476465	-0.361407	-0.242722	-0.184418	-0.220712			38.8	-0.0169819		-0.0146826		-0.0069555		-0.0586119	-0.0489991	-0.0453016
																											-0.37765	-0.297229	-0.196632	-0.192671	-0.224791			39.2	-0.0173482		-0.014392		-0.0062597		-0.0588674	-0.0501054	-0.0457946
																											-0.416587	-0.282772	-0.180921	-0.158543	-0.226086			39.6	-0.0164253		-0.0154315		-0.00689864		-0.0547712	-0.0516726	-0.0466034
																																		40	-0.017931				-0.00738051
																																		40.4	-0.0173968				-0.00701023
																																		40.8	-0.0172247				-0.00875328
																																		41.2	-0.0168402				-0.00809266
																																		41.6	-0.0187831				-0.0106129
																																		42	-0.0195036				-0.0106612
																																		42.4	-0.017081				-0.0112778
																																		42.8	-0.0194347				-0.0113559
																																		43.2	-0.0206612				-0.0119021
																																		43.6	-0.0203556				-0.0128211
																																		44	-0.0207523				-0.0120063
																																		44.4	-0.019198				-0.0129242
																																		44.8	-0.018775				-0.0117621
																																		45.2	-0.0193902				-0.0129849
																																		45.6	-0.0183945				-0.0124753
																																		46	-0.0208231				-0.0146548
																																		46.4	-0.0196371				-0.0139572
																																		46.8	-0.0207745				-0.0151356
																																		47.2	-0.0228166				-0.0141573
																																		47.6	-0.0226385				-0.013965
																																		48	-0.0230027				-0.0163754
																																		48.4	-0.0210396				-0.0166139
																																		48.8	-0.0227032				-0.0159337
																																		49.2	-0.023703				-0.0164334
																																		49.6	-0.0229117				-0.0152738
																																		50	-0.0239641				-0.0166384
																																		50.4	-0.0251399				-0.0167038
																																		50.8	-0.0249699				-0.0163154
																																		51.2	-0.0248687				-0.0174174
																																		51.6	-0.0234257				-0.016239
																																		52	-0.0254111				-0.0170382
																																		52.4	-0.0245348				-0.0174863
																																		52.8	-0.0257572				-0.0169582
																																		53.2	-0.0253382				-0.0170513
																																		53.6	-0.026253				-0.0172628
																																		54	-0.0256681				-0.0180442
																																		54.4	-0.0247614				-0.0198722
																																		54.8	-0.0269128				-0.0179593
																																		55.2	-0.0237981				-0.0199095
																																		55.6	-0.0265707				-0.0193576
																																		56	-0.0253747				-0.020514
																																		56.4	-0.0263805				-0.0207478
																																		56.8	-0.026591				-0.0202332
																																		57.2	-0.0272548				-0.0224482
																																		57.6	-0.026931				-0.0206778
																																		58	-0.0255325				-0.0221437
																																		58.4	-0.0277324				-0.0223508
																																		58.8	-0.0298534				-0.0227851
																																		59.2	-0.0274673				-0.0230243
																																		59.6	-0.0287038				-0.0223882
																																		60					-0.0223754
																																		60.4					-0.0236508
																																		60.8					-0.0241486
																																		61.2					-0.0233807
																																		61.6					-0.0246998
																																		62					-0.0249588
																																		62.4					-0.0244564
																																		62.8					-0.0250175
																																		63.2					-0.02494
																																		63.6					-0.0254073
																																		64					-0.0256849
																																		64.4					-0.0268202
																																		64.8					-0.0262119
																																		65.2					-0.028312
																																		65.6					-0.027166
																																		66					-0.0271017
																																		66.4					-0.029091
																																		66.8					-0.0282246
																																		67.2					-0.028381
																																		67.6					-0.0296386
																																		68					-0.0306734
																																		68.4					-0.0311333
																																		68.8					-0.0303454
																																		69.2					-0.0309638
																																		69.6					-0.0307516
																																		70					-0.0309947
																																		70.4					-0.0324183
																																		70.8					-0.0331709
																																		71.2					-0.0333696
																																		71.6					-0.0322551
																																		72					-0.0326969
																																		72.4					-0.034054
																																		72.8					-0.0339829
																																		73.2					-0.0346975
																																		73.6					-0.034232
																																		74					-0.0348926
																																		74.4					-0.0359609
																																		74.8					-0.035996
																																		75.2					-0.0366801
																																		75.6					-0.036011
																																		76					-0.0360099
																																		76.4					-0.0370902
																																		76.8					-0.0374473
																																		77.2					-0.0375188
																																		77.6					-0.0370824
																																		78					-0.0377736
																																		78.4					-0.0391481
																																		78.8					-0.0397391
																																		79.2					-0.0395386
																																		79.6					-0.0406829
																																		80
																																		80.4
																																		80.8
																																		81.2
																																		81.6
																																		82
																																		82.4
																																		82.8
																																		83.2
																																		83.6
																																		84
																																		84.4
																																		84.8
																																		85.2
																																		85.6
																																		86
																																		86.4
																																		86.8
																																		87.2
																																		87.6
																																		88
																																		88.4
																																		88.8
																																		89.2
																																		89.6
																																		90
																																		90.4
																																		90.8
																																		91.2
																																		91.6
																																		92
																																		92.4
																																		92.8
																																		93.2
																																		93.6
																																		94
																																		94.4
																																		94.8
																																		95.2
																																		95.6
																																		96
																																		96.4
																																		96.8
																																		97.2
																																		97.6
																																		98
																																		98.4
																																		98.8
																																		99.2
																																		99.6
																																		100
																																		100.4
																																		100.8
																																		101.2
																																		101.6
																																		102
																																		102.4
																																		102.8
																																		103.2
																																		103.6
																																		104
																																		104.4
																																		104.8
																																		105.2
																																		105.6
																																		106
																																		106.4
																																		106.8
																																		107.2
																																		107.6
																																		108
																																		108.4
																																		108.8
																																		109.2
