# Supplementary material for: Building the vertebrate codex using the gene breaking protein trap library
Source: eLife journal article supplement (doi:10.7554/elife.54572), 2020-08-11
Supplement: supp [file elife-54572-supp-v1.zip]

# Supplementary File 6 for Building the Vertebrate Codex using the Gene Breaking Protein Trap Library

Ichino et al.

1/23/2020

## Calcium Imaging Data Analyses

### Figure 4K—Peak by fish

```
#Reading in fish averaged data
fish348 <- read.csv("~/Rdata/fish348.csv")
fish348$fish <- as.factor(fish348$fish)
summary(fish348)

##      fish      gene      peak      num      totcell
## 1      : 1  gbt348hom:16  Min.   :0.0000  Min.   :1.000  Min.   :1.000
## 2      : 1    wt          :19  1st Qu.:0.0596  1st Qu.:1.000  1st Qu.:2.000
## 3      : 1                Median :0.7818  Median :1.000  Median :2.000
## 4      : 1                Mean   :1.9665  Mean   :2.171  Mean   :3.229
## 5      : 1                3rd Qu.:3.8626  3rd Qu.:3.000  3rd Qu.:5.000
## 6      : 1                Max.   :8.2873  Max.   :9.000  Max.   :8.000
## (Other):29

#Mann-Whitney U-test
Utest_fig4k <- wilcox.test(peak~gene, data = fish348, alternative = "two.sided", paired= FALSE)

## Warning in wilcox.test.default(x = c(0.43687541, 0.028478701, 0.004881698, :
## cannot compute exact p-value with ties

Utest_fig4k

##
## Wilcoxon rank sum test with continuity correction
##
## data:  peak by gene
## W = 6, p-value = 1.448e-06
## alternative hypothesis: true location shift is not equal to 0

#Asymptotic Mann-Whitney U-test due to existence of ties

library(coin)
Utest2_fig4k <- wilcox_test(peak~gene, data = fish348)
Utest2_fig4k

##
## Asymptotic Wilcoxon-Mann-Whitney Test
##
## data:  peak by gene (gbt348hom, wt)
## Z = -4.8349, p-value = 1.332e-06
```

```
## alternative hypothesis: true mu is not equal to 0
```

```
#Analysis of effect size with Cohen's d  
library(effsize)  
cohdfig4k<- cohen.d(peak~gene, data = fish348)  
cohdfig4k
```

```
##  
## Cohen's d  
##  
## d estimate: -1.829053 (large)  
## 95 percent confidence interval:  
## lower upper  
## -2.650261 -1.007846
```

```
#Because "gbt348hom" comes before "wt" in the alphabet R computes a "negative" Cohen's d in this case.
```

```
library(outliers)  
fish348wt <- read.csv("~/Rdata/fish348WT.csv")  
fish348gbt <- read.csv("~/Rdata/fish348GBT.csv")  
fish348wt$fish <- as.factor(fish348wt$fish)  
fish348gbt$fish <- as.factor(fish348gbt$fish)  
summary(fish348wt)
```

```
##      fish      gene      peak      num      totcell  
## 1      : 1      wt:19      Min.    :0.1664      Min.    :1.000      Min.    :1.000  
## 2      : 1      1st Qu.:1.1241      1st Qu.:1.000      1st Qu.:2.000  
## 3      : 1      Median  :3.6167      Median  :2.000      Median  :3.000  
## 4      : 1      Mean    :3.4900      Mean    :2.158      Mean    :3.421  
## 5      : 1      3rd Qu.:5.0210      3rd Qu.:2.500      3rd Qu.:5.000  
## 6      : 1      Max.    :8.2873      Max.    :9.000      Max.    :7.000  
## (Other):13
```

```
summary(fish348gbt)
```

```
##      fish      gene      peak      num      totcell  
## 20     : 1      gbt348hom:16      Min.    :0.00000      Min.    :1.000      Min.    :1.00  
## 21     : 1      1st Qu.:0.01816      1st Qu.:1.000      1st Qu.:1.75  
## 22     : 1      Median  :0.04961      Median  :1.000      Median  :2.00  
## 23     : 1      Mean    :0.15745      Mean    :2.188      Mean    :3.00  
## 24     : 1      3rd Qu.:0.26605      3rd Qu.:3.250      3rd Qu.:4.25  
## 25     : 1      Max.    :0.78182      Max.    :8.000      Max.    :8.00  
## (Other):10
```

```
#testing for an outlier in the WT dataset  
grubbs.test(fish348wt$peak, type = 10)
```

```
##  
## Grubbs test for one outlier  
##  
## data: fish348wt$peak  
## G = 1.95118, U = 0.77674, p-value = 0.3901  
## alternative hypothesis: highest value 8.287278317 is an outlier
```

```
#testing for an outlier in the GBT348Hom dataset  
grubbs.test(fish348gbt$peak, type = 10)
```

```
##
```

```
## Grubbs test for one outlier
##
## data: fish348gbt$peak
## G = 2.81593, U = 0.43613, p-value = 0.006409
## alternative hypothesis: highest value 0.781822916 is an outlier
#Asymptotic Mann-Whitney U test excluding outlier in GBT348Hom dataset
fish348x <- read.csv("~/Rdata/fish348x.csv")
fish348x$fish <- as.factor(fish348x$fish)
summary(fish348x)

##      fish      gene      peak      num      totcell
## 1      : 1  gbt348hom:15  Min.   :0.00000  Min.   :1.000  Min.   :1.000
## 2      : 1    wt          :19  1st Qu.:0.05732  1st Qu.:1.000  1st Qu.:2.000
## 3      : 1                Median :0.77782  Median :1.000  Median :2.000
## 4      : 1                Mean   :2.00137  Mean   :2.147  Mean   :3.235
## 5      : 1                3rd Qu.:3.98558  3rd Qu.:2.750  3rd Qu.:5.000
## 6      : 1                Max.   :8.28728  Max.   :9.000  Max.   :8.000
## (Other):28
```

```
Utest3_fig4k <- wilcox_test(peak~gene, data = fish348x)
Utest3_fig4k
```

```
##
## Asymptotic Wilcoxon-Mann-Whitney Test
##
## data: peak by gene (gbt348hom, wt)
## Z = -4.8042, p-value = 1.554e-06
## alternative hypothesis: true mu is not equal to 0
```

#### Figure 4L—Peak-width at half max

```
#Reading in individual kinetic data
kin348 <- read.csv("~/Rdata/348kin.csv")
kin348$cell <- as.factor(kin348$cell)
summary(kin348)
```

```
##      cell      gene      peak      width
## 1      : 1  gbt348hom:16  Min.   : 0.00918  Min.   : 1.098
## 2      : 1    wt          :32  1st Qu.: 0.25633  1st Qu.: 3.080
## 3      : 1                Median : 2.81048  Median : 4.249
## 4      : 1                Mean   : 3.42464  Mean   : 5.477
## 5      : 1                3rd Qu.: 5.71602  3rd Qu.: 6.821
## 6      : 1                Max.   :12.25581  Max.   :22.600
## (Other):42
##      rise      decay
## Min.   : 0.3989  Min.   :0.488
## 1st Qu.: 0.6200  1st Qu.:1.308
## Median : 0.7465  Median :2.085
## Mean   : 1.7208  Mean   :2.590
## 3rd Qu.: 1.5234  3rd Qu.:3.686
## Max.   :22.9649  Max.   :8.422
##      NA's      :1
```

```
#Running Mann-Whitney U-test
Utest_fig4l <- wilcox.test(width~gene, data = kin348, alternative = "two.sided", paired= FALSE)
```

```
Utest_fig41
```

```
##  
## Wilcoxon rank sum test  
##  
## data: width by gene  
## W = 299, p-value = 0.3565  
## alternative hypothesis: true location shift is not equal to 0
```

```
kin348wt <- read.csv("~/Rdata/348kinWT.csv")  
kin348gbt <- read.csv("~/Rdata/348kinGBT.csv")  
kin348wt$cell <- as.factor(kin348wt$cell)  
kin348gbt$cell <- as.factor(kin348gbt$cell)  
summary(kin348wt)
```

```
##      cell      gene      peak      width      rise  
## 1      : 1      wt:32      Min.    : 0.2187      Min.    : 1.098      Min.    :0.3989  
## 2      : 1              1st Qu.: 2.9942      1st Qu.: 2.923      1st Qu.:0.6058  
## 3      : 1              Median : 4.6847      Median : 3.981      Median :0.6780  
## 4      : 1              Mean    : 4.9927      Mean    : 4.944      Mean    :0.8299  
## 5      : 1              3rd Qu.: 7.2304      3rd Qu.: 6.821      3rd Qu.:0.7370  
## 6      : 1              Max.    :12.2558      Max.    :16.586      Max.    :3.7309  
## (Other):26  
##      decay  
## Min.    :0.488  
## 1st Qu.:1.479  
## Median :2.125  
## Mean    :2.639  
## 3rd Qu.:3.786  
## Max.    :7.485  
##
```

```
summary(kin348gbt)
```

```
##      cell      gene      peak      width  
## 33      : 1      gbt348hom:16      Min.    :0.00918      Min.    : 1.323  
## 34      : 1              1st Qu.:0.05658      1st Qu.: 3.667  
## 35      : 1              Median :0.09320      Median : 4.539  
## 36      : 1              Mean    :0.28860      Mean    : 6.545  
## 37      : 1              3rd Qu.:0.30463      3rd Qu.: 6.199  
## 38      : 1              Max.    :1.81724      Max.    :22.600  
## (Other):10  
##      rise      decay  
## Min.    : 0.7755      Min.    :0.5715  
## 1st Qu.: 1.4729      1st Qu.:1.1451  
## Median : 1.5578      Median :1.9446  
## Mean    : 3.5027      Mean    :2.4849  
## 3rd Qu.: 3.5286      3rd Qu.:2.4320  
## Max.    :22.9649      Max.    :8.4222  
##  
##      NA's      :1
```

```
#testing for an outlier in the WT dataset
```

```
grubbs.test(kin348wt$width, type = 10)
```

```
##  
## Grubbs test for one outlier
```

```
##
## data: kin348wt$width
## G = 3.55964, U = 0.57807, p-value = 0.0009204
## alternative hypothesis: highest value 16.58582 is an outlier
```

```
#testing for an outlier in the GBT348Hom dataset
grubbs.test(kin348gbt$width, type = 10)
```

```
##
## Grubbs test for one outlier
##
## data: kin348gbt$width
## G = 2.79613, U = 0.44403, p-value = 0.00731
## alternative hypothesis: highest value 22.6 is an outlier
```

```
#Mann-Whitney U test excluding outlier in both datasets
kin348x <- read.csv("~/Rdata/348kinx.csv")
kin348x$cell <- as.factor(kin348x$cell)
summary(kin348x)
```

```
##      cell      gene      peak      width
## 1      : 1  gbt348hom:15  Min.   : 0.00918  Min.   : 1.098
## 2      : 1  wt           :31  1st Qu.: 0.30463  1st Qu.: 3.040
## 3      : 1                Median : 2.81048  Median : 4.178
## 4      : 1                Mean    : 3.47478  Mean    : 4.864
## 5      : 1                3rd Qu.: 6.00780  3rd Qu.: 6.263
## 6      : 1                Max.    :12.25581  Max.    :17.962
## (Other):40
##      rise      decay
## Min.   : 0.3989  Min.   :0.488
## 1st Qu.: 0.6153  1st Qu.:1.288
## Median : 0.7227  Median :2.058
## Mean    : 1.6058  Mean    :2.526
## 3rd Qu.: 1.4729  3rd Qu.:3.604
## Max.    :22.9649  Max.    :8.422
##
```

```
Utest2_fig4l <- wilcox.test(width~gene, data = kin348x)
Utest2_fig4l
```

```
##
## Wilcoxon rank sum test
##
## data: width by gene
## W = 266, p-value = 0.4437
## alternative hypothesis: true location shift is not equal to 0
```

#### Figure 4M—Rise time

```
#Running Mann-Whitney U-test
Utest_fig4m <- wilcox.test(rise~gene, data = kin348, alternative = "two.sided", paired= FALSE)
Utest_fig4m
```

```
##
## Wilcoxon rank sum test
##
```

```

## data: rise by gene
## W = 482, p-value = 2.427e-08
## alternative hypothesis: true location shift is not equal to 0
#Analysis of effect size with Cohen's d
cohdfig4m<- cohen.d(rise~gene, data = kin348)
cohdfig4m

##
## Cohen's d
##
## d estimate: 0.8663981 (large)
## 95 percent confidence interval:
## lower upper
## 0.2248897 1.5079064
#testing for an outlier in the WT dataset
grubbs.test(kin348wt$rise, type = 10)

##
## Grubbs test for one outlier
##
## data: kin348wt$rise
## G = 4.58245, U = 0.30077, p-value = 4.068e-08
## alternative hypothesis: highest value 3.730921631 is an outlier
#testing for an outlier in the GBT348Hom dataset
grubbs.test(kin348gbt$rise, type = 10)

##
## Grubbs test for one outlier
##
## data: kin348gbt$rise
## G = 3.654834, U = 0.050111, p-value = 1.36e-09
## alternative hypothesis: highest value 22.9649 is an outlier
#Mann-Whitney U test excluding outlier in both datasets
kin348xr <- read.csv("~/Rdata/348kinxr.csv")
kin348xr$cell <- as.factor(kin348xr$cell)
summary(kin348xr)

##      cell      gene      peak      width
## 1      : 1  gbt348hom:15  Min.   : 0.01099  Min.   : 1.098
## 2      : 1      wt      :31  1st Qu.: 0.30463  1st Qu.: 3.040
## 3      : 1                Median : 2.81048  Median : 4.178
## 4      : 1                Mean   : 3.47572  Mean   : 4.964
## 5      : 1                3rd Qu.: 6.00780  3rd Qu.: 6.263
## 6      : 1                Max.   :12.25581  Max.   :22.600
## (Other):40
##      rise      decay
## Min.   :0.3989  Min.   :0.488
## 1st Qu.:0.6153  1st Qu.:1.268
## Median :0.7227  Median :2.032
## Mean   :1.2153  Mean   :2.395
## 3rd Qu.:1.4729  3rd Qu.:3.438
## Max.   :5.0019  Max.   :7.485
##      NA's      :1

```

```
Utest2_fig4m <- wilcox.test(rise~gene, data = kin348xr)
Utest2_fig4m
```

```
##
## Wilcoxon rank sum test
##
## data: rise by gene
## W = 449, p-value = 3.572e-09
## alternative hypothesis: true location shift is not equal to 0
```

#### Figure 4N—Decay time

```
#Running Mann-Whitney U-test
```

```
Utest_fig4n <- wilcox.test(decay~gene, data = kin348, alternative = "two.sided", paired= FALSE)
Utest_fig4n
```

```
##
## Wilcoxon rank sum test
##
## data: decay by gene
## W = 217, p-value = 0.6114
## alternative hypothesis: true location shift is not equal to 0
```

```
#testing for an outlier in the WT dataset
```

```
grubbs.test(kin348wt$decay, type = 10)
```

```
##
## Grubbs test for one outlier
##
## data: kin348wt$decay
## G = 2.83123, U = 0.73308, p-value = 0.03947
## alternative hypothesis: highest value 7.48504248 is an outlier
```

```
#testing for an outlier in the GBT348Hom dataset
```

```
grubbs.test(kin348gbt$decay, type = 10)
```

```
##
## Grubbs test for one outlier
##
## data: kin348gbt$decay
## G = 2.80380, U = 0.39837, p-value = 0.005085
## alternative hypothesis: highest value 8.422230469 is an outlier
```

```
#Mann-Whitney U test excluding outlier in both datasets
```

```
kin348xd <- read.csv("~/Rdata/348kinxd.csv")
```

```
kin348xd$cell <- as.factor(kin348xd$cell)
```

```
summary(kin348xd)
```

```
##      cell      gene      peak      width
## 1      : 1  gbt348hom:15  Min.   : 0.01099  Min.   : 1.098
## 2      : 1    wt          :31  1st Qu.: 0.30463  1st Qu.: 3.040
## 3      : 1                Median : 2.81048  Median : 4.178
## 4      : 1                Mean   : 3.47141  Mean   : 5.099
## 5      : 1                3rd Qu.: 6.00780  3rd Qu.: 6.263
## 6      : 1                Max.   :12.25581  Max.   :22.600
## (Other):40
```

```
##      rise      decay
## Min.   :0.3989   Min.    :0.488
## 1st Qu.:0.6153   1st Qu.:1.268
## Median :0.7227   Median  :2.032
## Mean   :1.2789   Mean    :2.351
## 3rd Qu.:1.5124   3rd Qu.:3.438
## Max.   :5.0019   Max.    :5.541
##                NA's    :1

Utest2_fig4n <- wilcox.test(decay~gene, data = kin348xd)
Utest2_fig4n

##
## Wilcoxon rank sum test
##
## data:  decay by gene
## W = 185, p-value = 0.4445
## alternative hypothesis: true location shift is not equal to 0
```

Figure 4—figure supplement 1A—Peak by cell

```
#Reading in cell averaged data
cell348 <- read.csv("~/Rdata/cell348.csv")
cell348$cell <- as.factor(cell348$cell)
summary(cell348)

##      cell      gene      peak      peaknum
## 1      : 1  gbt348hom:48  Min.   :0.00000  Min.    :0.000
## 2      : 1    wt          :64  1st Qu.:0.03449  1st Qu.:0.000
## 3      : 1                Median :0.59974  Median  :1.000
## 4      : 1                Mean   :1.71208  Mean    :1.643
## 5      : 1                3rd Qu.:2.50715  3rd Qu.:2.250
## 6      : 1                Max.   :8.42028  Max.    :9.000
## (Other):106

#Running Mann-Whitney U-test
Utest_fig4s1a <- wilcox.test(peak~gene, data = cell348, alternative = "two.sided", paired= FALSE)
Utest_fig4s1a

##
## Wilcoxon rank sum test with continuity correction
##
## data:  peak by gene
## W = 90, p-value < 2.2e-16
## alternative hypothesis: true location shift is not equal to 0

#Analysis of effect size with Cohen's d
cohdfig4s1a <- cohen.d(peak~gene, data = cell348)
cohdfig4s1a

##
## Cohen's d
##
## d estimate: -1.445318 (large)
## 95 percent confidence interval:
##      lower      upper
```



```
## -1.869360 -1.021276
```

```
#Because "gbt348hom" comes before "wt" in the alphabet R computes a "negative" Cohen's d in this case.
```

```
cell348wt <- read.csv("~/Rdata/cell348WT.csv")
cell348gbt <- read.csv("~/Rdata/cell348GBT.csv")
cell348wt$cell <- as.factor(cell348wt$cell)
cell348gbt$cell <- as.factor(cell348gbt$cell)
summary(cell348wt)
```

```
##      cell      gene      peak      peaknum
## 1      : 1    wt:64    Min.    :0.06406    Min.    :1.00
## 2      : 1                1st Qu.:0.78922    1st Qu.:1.00
## 3      : 1                Median  :1.98992    Median  :2.00
## 4      : 1                Mean    :2.90744    Mean    :2.25
## 5      : 1                3rd Qu.:4.55220    3rd Qu.:3.00
## 6      : 1                Max.    :8.42028    Max.    :9.00
## (Other):58
```

```
summary(cell348gbt)
```

```
##      cell      gene      peak      peaknum
## 65     : 1    gbt348hom:48    Min.    :0.000000    Min.    :0.0000
## 66     : 1                1st Qu.:0.003265    1st Qu.:0.0000
## 67     : 1                Median  :0.016491    Median  :0.0000
## 68     : 1                Mean    :0.118277    Mean    :0.8333
## 69     : 1                3rd Qu.:0.061702    3rd Qu.:1.0000
## 70     : 1                Max.    :1.898103    Max.    :8.0000
## (Other):42
```

```
#testing for an outlier in the WT dataset
```

```
grubbs.test(cell348wt$peak, type = 10)
```

```
##
## Grubbs test for one outlier
##
## data: cell348wt$peak
## G = 2.17353, U = 0.92382, p-value = 0.8727
## alternative hypothesis: highest value 8.42028226 is an outlier
```

```
#testing for an outlier in the GBT348Hom dataset
```

```
grubbs.test(cell348gbt$peak, type = 10)
```

```
##
## Grubbs test for one outlier
##
## data: cell348gbt$peak
## G = 5.83977, U = 0.25897, p-value = 1.066e-13
## alternative hypothesis: highest value 1.898102954 is an outlier
```

```
#Mann-Whitney U test excluding outlier in GBT348Hom dataset
```

```
cell348x <- read.csv("~/Rdata/cell348x.csv")
cell348x$cell <- as.factor(cell348x$cell)
summary(cell348x)
```

```
##      cell      gene      peak      peaknum
## 1      : 1    gbt348hom:47    Min.    :0.00000    Min.    :0.000
## 2      : 1    wt      :64    1st Qu.:0.03404    1st Qu.:0.000
## 3      : 1                Median  :0.51984    Median  :1.000
```

```
## 4      : 1          Mean   :1.71041   Mean   :1.631
## 5      : 1          3rd Qu.:2.53931   3rd Qu.:2.000
## 6      : 1          Max.    :8.42028   Max.    :9.000
## (Other):105
```

```
Utest2_fig4s1a <- wilcox.test(peak~gene, data = cell348x)
Utest2_fig4s1a
```

```
##
## Wilcoxon rank sum test with continuity correction
##
## data: peak by gene
## W = 58, p-value < 2.2e-16
## alternative hypothesis: true location shift is not equal to 0
```

Figure 4—figure supplement 1B—Response number by cell

```
#Running Mann-Whitney U-test
```

```
Utest_fig4s1b <- wilcox.test(peaknum~gene, data = cell348, alternative = "two.sided", paired= FALSE)
Utest_fig4s1b
```

```
##
## Wilcoxon rank sum test with continuity correction
##
## data: peaknum by gene
## W = 518.5, p-value = 7.861e-10
## alternative hypothesis: true location shift is not equal to 0
```

```
#Analysis of effect size with Cohen's d
```

```
cohdfig4s1b<- cohen.d(peaknum~gene, data = cell348)
cohdfig4s1b
```

```
##
## Cohen's d
##
## d estimate: -0.9310606 (large)
## 95 percent confidence interval:
## lower upper
## -1.3290369 -0.5330843
```

```
#Because "gbt348hom" comes before "wt" in the alphabet R computes a "negative" Cohen's d in this case.
```

```
#testing for an outlier in the WT dataset
```

```
grubbs.test(cell348wt$peaknum, type = 10)
```

```
##
## Grubbs test for one outlier
##
## data: cell348wt$peaknum
## G = 4.49604, U = 0.67404, p-value = 2.684e-05
## alternative hypothesis: highest value 9 is an outlier
```

```
#testing for an outlier in the GBT348Hom dataset
```

```
grubbs.test(cell348gbt$peaknum, type = 10)
```

```
##
## Grubbs test for one outlier
##
```

```
## data: cell1348gbt$peaknum
## G = 4.62880, U = 0.53443, p-value = 2.219e-06
## alternative hypothesis: highest value 8 is an outlier
```

```
#Mann-Whitney U test excluding outlier in both datasets
cell1348xp <- read.csv("~/Rdata/cell1348xp.csv")
cell1348xp$cell <- as.factor(cell1348xp$cell)
summary(cell1348xp)
```

```
##      cell      gene      peak      peaknum
## 1      : 1  gbt348hom:47  Min.   :0.0000  Min.   :0.000
## 2      : 1      wt      :63  1st Qu.:0.0336  1st Qu.:0.000
## 3      : 1      Median :0.5771  Median :1.000
## 4      : 1      Mean   :1.7226  Mean   :1.518
## 5      : 1      3rd Qu.:2.5715  3rd Qu.:2.000
## 6      : 1      Max.   :8.4203  Max.   :9.000
## (Other):104
```

```
Utest2_fig4s1b <- wilcox.test(peaknum~gene, data = cell1348xp)
Utest2_fig4s1b
```

```
##
## Wilcoxon rank sum test with continuity correction
##
## data: peaknum by gene
## W = 456.5, p-value = 1.909e-10
## alternative hypothesis: true location shift is not equal to 0
```

## Power Analyses For Calcium Imaging Experiments

```
#reading in peak dF/FO by cell from first two trials
dataset1 <- read.csv("~/Rdata/dataset1xy.csv")
summary(dataset1)
```

```
##      data      genotype
## Min.   :0.00000  Hom:27
## 1st Qu.:0.01282  WT :32
## Median :0.24896
## Mean   :0.77150
## 3rd Qu.:0.99591
## Max.   :5.98587
```

```
#Two-sample t-test assuming equal variance to calculate the effect size using Cohen's d
result1 <- t.test(data~genotype, data = dataset1, var.equal = TRUE)
result1
```

```
##
## Two Sample t-test
##
## data: data by genotype
## t = -5.1022, df = 57, p-value = 4.008e-06
## alternative hypothesis: true difference in means is not equal to 0
## 95 percent confidence interval:
## -1.8439141 -0.8044921
## sample estimates:
## mean in group Hom mean in group WT
```

```

##          0.05328905          1.37749211
#using Cohen's d to calculate the effect size. (This formula assumes equal variance)
abs(result1$statistic)*sqrt((32+27)/(32*27))

##          t
## 1.333297
# load "pwr" package
library(pwr)
# calculate the power of this experiment based upon cells and effect size
pwr.t2n.test(n1=32,n2=27, d=1.333297, sig.level=0.05, power=NULL)

##
##      t test power calculation
##
##          n1 = 32
##          n2 = 27
##          d = 1.333297
##      sig.level = 0.05
##          power = 0.9988734
##      alternative = two.sided
# use effect size to calculate the number of cells required for power = 0.8
pwr.t.test(n=NULL, d=1.333297, sig.level = 0.05, power = 0.8,type = "two.sample")

##
##      Two-sample t test power calculation
##
##          n = 9.889524
##          d = 1.333297
##      sig.level = 0.05
##          power = 0.8
##      alternative = two.sided
##
## NOTE: n is number in each group
#calculating experimental delta off of the t.test
result1$estimate[2]-result1$estimate[1]

## mean in group WT
##          1.324203
#calculating experimental standard deviation
sd(dataset1$data)

## [1] 1.188332
# use observed difference and standard deviation to calculate the cells needed for power = 0.8
power.t.test(n=NULL, delta = 1.324203, sd=1.188332, sig.level = 0.05, power=0.8)

##
##      Two-sample t test power calculation
##
##          n = 13.67198
##          delta = 1.324203
##          sd = 1.188332
##      sig.level = 0.05
##          power = 0.8

```

```

##      alternative = two.sided
##
## NOTE: n is number in each group
#reading in peak dF/FO by fish from first two trials
dataset2 <-read.csv("~/Rdata/dataset2xy.csv")
summary(dataset2)

##      data      genotype
## Min.   :0.004882 Hom:5
## 1st Qu.:0.036329 WT :6
## Median :0.436875
## Mean   :0.817645
## 3rd Qu.:1.512719
## Max.   :2.353572

#Two-sample t-test assuming equal variance to calculate the effect size using Cohen's d
result2 <- t.test(data~genotype, data = dataset2, var.equal=TRUE)
result2

##
## Two Sample t-test
##
## data: data by genotype
## t = -3.079, df = 9, p-value = 0.01316
## alternative hypothesis: true difference in means is not equal to 0
## 95 percent confidence interval:
## -2.2596843 -0.3455981
## sample estimates:
## mean in group Hom mean in group WT
##      0.1071131      1.4097544

#using Cohen's d to calculate the effect size. (This formula assumes equal variance)
abs(result2$statistic)*sqrt((6+5)/(6*5))

##      t
## 1.864455

#calculate the power of this experiment based upon fish and effect size
pwr.t2n.test(n1=6,n2=5, d=1.864455, sig.level=0.05, power=NULL)

##
##      t test power calculation
##
##      n1 = 6
##      n2 = 5
##      d = 1.864455
##      sig.level = 0.05
##      power = 0.7821757
##      alternative = two.sided

# use effect size to calculate the number of fish required for power = 0.8
pwr.t.test(n=NULL, d=1.864455, sig.level = 0.05, power=0.8, type = "two.sample")

##
##      Two-sample t test power calculation
##
##      n = 5.658288

```

```

##           d = 1.864455
##      sig.level = 0.05
##           power = 0.8
##      alternative = two.sided
##
## NOTE: n is number in *each* group
#calculating experimental delta off of the t.test
result2$estimate[2]-result2$estimate[1]

## mean in group WT
##           1.302641
#calculating experimental standard deviation
sd(dataset2$data)

## [1] 0.9497955
# use observed difference and standard deviation to calculate the fish needed for power = 0.8
power.t.test(n=NULL, delta = 1.302641, sd = 0.9497955, sig.level = 0.05, power=0.8)

##
##      Two-sample t test power calculation
##
##           n = 9.409926
##           delta = 1.302641
##           sd = 0.9497955
##           sig.level = 0.05
##           power = 0.8
##           alternative = two.sided
##
## NOTE: n is number in *each* group

```
