# Supplementary material for: Building the vertebrate codex using the gene breaking protein trap library
Source: eLife journal article supplement (doi:10.7554/elife.54572), 2020-08-11
Supplement: supp [file elife_poa_e54572_Figure_6_source_data_1.xlsx]

## Sheet: Sheet1
Protein Class (105)	Line	Zebrafish Gene Symbol	Human Gene Symbol
Transcription factor (19)
	GBT0001	casz1	CASZ1
	GBT0016	pbx1a	PBX1
	GBT0101	dido1	DIDO1
	GBT0133	zic2a	ZIC2
	GBT0135	bhlhe41	BHLHE41
	GBT0143	wtip	WTIP
	GBT0190	barhl2	BARHL2
	GBT0240	bcl11ba	BCL11B
	GBT0251	foxl2a	FOXL2
	GBT0270/GBT0978	zfpm2a	ZFPM2
	GBT0340	nfatc3a	NFATC3
	GBT0419	rxraa	RXRA
	GBT0503	stat1a	STAT1
	GBT0528	zbtb16a	ZBTB16
	GBT0552	znf1015	ZNF579
	GBT0717	taf6l	TAF6L
	GBT0993	cdip1	CDIP1
	GBT1070	zfpl1	ZFPL1
	GBT1105	tbx15	TBX15
Nucreic acid binding (17)
	GBT0070	mcm9	MCM9
	GBT0073/GBT0077	abcf1	ABCF1
	GBT0091	enox1	ENOX1
	GBT0101	dido1	DIDO1
	GBT0131	ddb2	DDB2
	GBT0137	eef1a1b	EEF1A1
	GBT0188	pole4	POLE4
	GBT0190	barhl2	BARHL2
	GBT0251	foxl2a	FOXL2
	GBT0270/GBT0978	zfpm2a	ZFPM2
	GBT0323	adarb2	ADARB2
	GBT0419	rxraa	RXRA
	GBT0433	ddb1	DDB1
	GBT0434	gar1	GAR1
	GBT0503	stat1a	STAT1
	GBT0591	dhx37	DHX37
	GBT1105	tbx15	TBX15
hydrolase (14)
	GBT0035	parga	PARG
	GBT0070	mcm9	MCM9
	GBT0073/GBT0077	abcf1	ABCF1
	GBT0137	eef1a1b	EEF1A1
	GBT0178	ada	ADA
	GBT0250	ptprma	PTPRM
	GBT0261	capn12	CAPN12
	GBT0312	ptprfb	PTPRF
	GBT0323	adarb2	ADARB2
	GBT0398	pnpla7a	PNPLA7
	GBT0357	ca16b	PTPRG
	GBT0760	adgrl2b.1	ADGRL2
	GBT0966	plpp2a	PLPP2
	GBT1102	gbe1a	GBE1
Receptor (10)
	GBT0005	itgb1b	ITGB1
	GBT0039	gabbr1,2	GABBR1
	GBT0060	crfb4	IL10RB
	GBT0250	ptprma	PTPRM
	GBT0312	ptprfb	PTPRF
	GBT0357	ca16b	PTPRG
	GBT0419	rxraa	RXRA
	GBT0750	col7a1	COL7A1
	GBT0760	adgrl2b.1	ADGRL2
Transferese (7)
	GBT0157	mgat5	MGAT5
	GBT0238	tgfbr1b	TGFBR1
	GBT0329	csgalnact1a	CSGALNACT1
	GBT0364	mat2aa	MAT2A
	GBT0785	mboat7	MBOAT7
	GBT1023	csnk1da	CSNK1D
	GBT1036	mark4a	MARK4
Transporter (5)
	GBT0073/GBT0077	abcf1	ABCF1
	GBT0166	atp1b2a	ATP1B2
	GBT0348	ryr1b	RYR1
	GBT0511	oca2	OCA2
	GBT1093	ryr2a	RYR2
	GBT1129	cacna1ha	CACNA1H
Ensyme modulator (5)
	GBT0137	eef1a1b	EEF1A1
	GBT0243	ppp1r13ba	PPP1R13B
	GBT0323	adarb2	ADARB2
	GBT0397	phactr4b	PHACTR4
	GBT0401	erc1b	ERC1
Membrane traffic protein (5)
	GBT0232	syt5b	SYT5
	GBT0365	sncgb	SNCG
	GBT0401	erc1b	ERC1
	GBT0410	vapal	VAPA
	GBT0534	napab	NAPA
Defense/Immunity protein (4)
	GBT0060	crfb4	IL10RB
	GBT0249	b2ml	B2M
	GBT0323	adarb2	ADARB2
	GBT0760	adgrl2b.1	ADGRL2
Signaling molecule (4)
	GBT0094	fgf13b	FGF13
	GBT0175	arhgef25b	ARHGEF25
	GBT0237	nrg2a	NRG2
	GBT0525	mapk8ip1b	MAPK8IP1
Cytoskeletal protein (3)
	GBT0031	tnnt2a	TNNT2
	GBT0239	map7d1b	MAP7D1
	GBT0545	wasf3b	WASF3
Chaperone (2)
	GBT0082	cct8	CCT8
	GBT0365	sncgb	SNCG
Structural protein (2)
	GBT0141	gpm6ba	GPM6B
	GBT0369	gpm6ab	GPM6A
Calcium-binding protein (1)
	GBT0261	capn12	CAPN12
Cell adhesion molecule (1)
	GBT0005	itgb1b	ITGB1
Extracellular matrix protein (1)
	GBT0325	megf6b	MEGF6
Ligase (1)
	GBT0593	skp1	SKP1
Lyase (1)
	GBT0409	npr2	NPR2
Oxidoreductase (1)
	GBT0091	enox1	ENOX1
Transfer/Carrier protein (1)
	GBT0412	xpo7	XPO7
Transmembrane receptor regulatory/Adaptor protein (1)
	GBT0972	dlg1	DLG1
