# Supplementary material for: Building the vertebrate codex using the gene breaking protein trap library
Source: eLife. 2020 Aug 11;9:e54572. doi: 10.7554/eLife.54572 (PMC7486118; doi:10.7554/eLife.54572)
Supplement: Supplementary file 1. — Table lists the tagged genes (or unannotated coding sequence) of GBT-confirmed lines, genomic location and orientation of integrated loci, novel expression at 2 and 4 dpf, their human orthologs, and disease associations of their human orthologs. Blue text: published GBT-confirmed line, Red text: Integration locus in unannotated coding sequence, *: RNA sequencing reads mapping on the unannotated loci in at least one public dataset, †; zebrafish paralogs of GBT-tagged genes with one human ortholog, ‡: sequence of single 5’ or 3’ RACE product matched to two separate transcripts, *: integration locus mapped to GRCz11, γ: line previously published as GBT0136, d: denotes replicate genes with distinct integration events. [file elife-54572-supp1.xlsx]

## Sheet: Supplementary file 1
Line	Tag	Position (GRCz10)	mRFP Orientation	Zebrafish Gene Symbol	Novel Expression		Human Ortholog Gene Symbol	Human Disease Linked
					2 dpf	4 dpf
GBT0001	R15	chr23:29,077,368-29,138,641	-	casz1		Y	CASZ1
GBT0002	R15	chr14:29,552,103-29,552,363	-	sorbs2b	Y	Y	SORBS2
GBT0005	R15	chr2:43,545,269-43,545,546˟	+	itgb1b			ITGB1
GBT0007	R16	chr17:26,704,843-26,705,032	+	nrde2	Y	Y	NRDE2
GBT0010	R15	chr7:43,426,161-43,435,732	-	cdh11			CDH11	Y
GBT0016	R16	chr2:19,085,853-19,117,402	-	pbx1a		Y	PBX1	Y
GBT0019	R14	chr17:2,552,793-2,553,105	+	kcnk10b	Y	Y	KCNK10
GBT0020/GBT0113	RP2.1	chr23:11,811,662-11,811,670	+	cntn3a.1		Y	CNTN3
GBT0021	R16	chr22:13,508,943-13,509,111	-	cntnap5b		Y	CNTNAP5
GBT0028	RP2.1	chr23:2,732,074-2,755,503	+	LOC101882228‡			DIAPH1	Y
GBT0031	R14	chr23:5,740,038-5,740,356	-	tnnt2a		Y	TNNT2	Y
GBT0033	RP2.1	chr7:61,332,839-61,373,083	-	lrch4	Y	Y	LRCH4
GBT0034	RP2.1	chr2:27,064,446-27,064,654	-	si:dkey-181m9.8	Y	Y	No ortholog
GBT0035	RP2.1	chr13:29,207,920-29,208,251	-	parga	Y	Y	PARG
GBT0038	RP2.1	chr9:30,494,342-30,494,350	+	srpx		Y	SRPX
GBT0039	R15	chr19:27,579,041-27,579,398	-	gabbr1.2		Y	GABBR1
GBT0040	RP2.1	chr19:20,189,340-20,195,610	+	hoxa5a–hoxa3a		Y	HOXA cluster
GBT0043	R15	chr7:25,613,656-25,613,731	-	cd99l2		Y	CD99L2
GBT0046	R14	chr2:40,440,181-40,476,302	+	epha4b	Y		EPHA4
GBT0060	RP2.1	chr9:16,082,494-16,082,728	-	crfb4	Y	Y	IL10RB	Y
GBT0067	RP2.1	chr16:52,611,362-52,612,230	+	myom3	Y	Y	MYOM3
GBT0070	RP2.1	chr20:41,917,993-41,918,001	+	mcm9	Y	Y	MCM9	Y
GBT0073/GBT0077	R14.5	chr19:30,848,633-30,848,641	-	abcf1		Y	ABCF1
GBT0078	RP2.1	chr4:13,136,764-13,137,022	-	grip1		Y	GRIP1	Y
GBT0082	P9	chr10:25,367,541-25,368,373	-	cct8			CCT8
GBT0091	RP2.1	chr9:18,408,342-18,408,350	-	enox1		Y	ENOX1
GBT0094	RP2.1	chr10:26,770,922-26,770,930	-	fgf13b		Y	FGF13
GBT0096	RP2.1	chr5:31,045,162-31,045,170	-	sh3glb2b		Y	SH3GLB2
GBT0101	RP2.1	chr11:18,388,686-18,389,389	-	dido1	Y	Y	DIDO1
GBT0103	RP2.1	chr12:17,383,665-17,383,673	+	cyth3a	Y	Y	CYTH3
GBT0111/GBT0202	RP2.1	chr23:22,886,740-22,886,748	+	rerea		Y	RERE	Y
GBT0115	RP2.1	chr8:12,367,442-12,368,341	-	Unannotated coding sequence		Y
GBT0125	RP2.1	chr9:52,256,859-52,256,867	+	cd302	Y	Y	CD302
GBT0126	RP2.1	chr9:14,442,419-14,442,744	-	nrp2b		Y	NRP2
GBT0131	RP2.1	chr18:20,479,803-20,479,811	+	ddb2		Y	DDB2	Y
GBT0133	RP2.1	chr9:31,471,963-31,471,971	+	zic2a		Y	ZIC2	Y
GBT0135	RP2.1	chr18:16,137,670-16,137,678	+	bhlhe41		Y	BHLHE41	Y
GBT0137	RP2.1	chr1:30,314,968-30,314,976	+	eef1a1b		Y	EEF1A1	Y
GBT0141	RP2.1	chr1:28,240,652-28,240,833	-	gpm6ba	Y	Y	GPM6B
GBT0142	RP2.1	chr3:51,734,349-51,735,092	-	aatka		Y	AATK
GBT0143	RP2.1	chr18:587,027-587,035	-	wtip			WTIP
GBT0144	RP2.1	chr3:47,849,648-47,849,656	+	unkl	Y	Y	UNKL
GBT0145	RP2.1	chr3:39,528,870-39,528,878	+	epn2	Y	Y	EPN2
GBT0148	RP2.1	chr16:51,697,049-51,697,948	+	Unannotated coding sequence*		Y
GBT0151	RP2.1	chr13:33,122,522-33,122,530	-	nusap1		Y	NUSAP1
GBT0154	RP2.1	chr8:23,775,727-23,776,087	+	si:ch211-163l21.8		Y	KIAA1324
GBT0156	RP2.1	chr5:38,361,783-38,362,256	+	fras1		Y	FRAS1	Y
GBT0157	RP2.1	chr22:12,037,023-12,037,031	+	mgat5	Y	Y	MGAT5
GBT0166	RP2.1	chr23:45,031,801-45,031,936	+	atp1b2a		Y	ATP1B2
GBT0168	RP2.1	chr14:31,918,349-31,958,846	-	fgf13a		Y	FGF13
GBT0170	RP2.1	chr19:25,779,622-25,782,678	-	glcci1a		Y	GLCCI1	Y
GBT0171	RP2.1	chr17:53,262,023-53,263,721	-	unc79	Y	Y	UNC79
GBT0172	RP2.1	chr17:49,909,879-49,909,887	-	tmem30aa	Y	Y	TMEM30A
GBT0175	RP2.1	chr6:39,272,990-39,272,998	-	arhgef25b		Y	ARHGEF25
GBT0178	RP2.1	chr23:26,042,141-26,042,149	-	ada		Y	ADA	Y
GBT0181	RP2.1	chr1:38,942,125-38,942,133	+	tenm3		Y	TENM3	Y
GBT0186	RP2.1	chr4:20,635,069-20,635,077	+	cacna1c		Y	CACNA1C	Y
GBT0187	RP2.1	chr22:9,834,660-9,834,668	+	si:dkey-253d23.3		Y	No ortholog
GBT0188	RP2.1	chr11:6,208,589-6,208,597	-	pole4		Y	POLE4
GBT0189/GBT0195/GBT0795	RP2.1	chr2:23,341,495-23,341,503	-	znf414		Y	ZNF414
GBT0190	RP2.1	chr6:24,719,825-24,719,833	+	barhl2		Y	BARHL2
GBT0196	RP2.1	chr14:26,478,533-26,478,540	+	ahnak	Y	Y	AHNAK
GBT0200/GBT0292	RP2.1	chr19:27,751,888-27,751,896	-	znrd1		Y	ZNRD1
GBT0201	RP2.1	chr1:46,458,939-46,458,947	-	mhc1zca	Y	Y	MR1
GBT0203	RP2.1	chr10:30,316,150-30,316,158	+	ntm		Y	IGSF5
GBT0204/GBT0407	RP2.1	chr16:24,432,037-24,432,045	-	cadm4		Y	CADM4
GBT0205	RP2.1	chr12:9,811,907-9,811,915	+	fam117ab	Y	Y	FAM117A
GBT0208	RP2.1	chr17:20,117,738-20,117,746	-	actn2b			ACTN2	Y
GBT0209	RP2.1	chr15:26,152,958-26,152,966	-	dph1	Y	Y	DPH1	Y
GBT0230	RP2.1	chr15:19,365,785-19,365,793	+	jam3a		Y	JAM3	Y
GBT0231	RP2.1	chr7:53,793,801-53,794,129	+	neo1a		Y	NEO1
GBT0232	RP2.1	chr24:7,658,876-7,658,884	-	syt5b		Y	SYT5
GBT0235	RP2.1	chr13:10,713,074-10,713,082	+	lrpprc		Y	LRPPRC	Y
GBT0237	RP2.1	chr21:28,628,953-28,628,961	-	nrg2a	Y	Y	NRG2
GBT0238	RP2.1	chr24:390,618-390,626	+	tgfbr1b		Y	TGFBR1	Y
GBT0239	RP2.1	chr19:4,047,959-4,047,967	-	map7d1b†	Y	Y	MAP7D1†
GBT0240	RP2.1	chr17:18,128,165-18,128,173	+	bcl11ba	Y	Y	BCL11B	Y
GBT0241	RP2.1	chr20:22,886,784-22,886,792	-	fip1l1a	Y	Y	FIP1L1
GBT0242	RP2.1	chr7:8,465,719-8,465,727	-	tex261	Y	Y	TEX261
GBT0243	RP2.1	chr17:14,612,357-14,612,365	-	ppp1r13ba			PPP1R13B
GBT0245	RP2.1	chr13:24,532,473-24,532,481	+	msx3			No ortholog
GBT0249	RP2.1	chr8:50,953,631-50,953,639	+	b2ml	Y	Y	B2M	Y
GBT0250	RP2.1	chr24:41,687,734-41,687,742	-	ptprma		Y	PTPRM
GBT0251	RP2.1	chr15:7,060,550-7,060,558	+	foxl2a	Y	Y	FOXL2	Y
GBT0255	RP2.1	chr9:35,488,278-35,488,286	-	ncam2		Y	NCAM2
GBT0256	RP2.1	chr14:7,539,272-7,539,280	-	ppp3cb		Y	PPP3CA	Y
GBT0261	RP2.1	chr18:36,732,769-36,732,777	+	capn12	Y	Y	CAPN12
GBT0263	RP2.1	chr20:34,304,041-34,304,049	-	hmcn1d		Y	HMCN1d	Y
GBT0264	RP2.1	chr5:47,526,310-47,526,318	+	Unannotated coding sequence*	Y	Y
GBT0268γ	RP2.1	chr25:34,685,633-34,685,641	+	ano5a	Y	Y	ANO5	Y
GBT0270/GBT0978	RP2.1	chr16:44,080,184-44,080,192	-	zfpm2a		Y	ZFPM2	Y
GBT0271	RP2.1	chr16:35,765,472-35,765,480	+	map7d1a†		Y	MAP7D1†
GBT0275	RP2.1	chr15:36,095,386-36,095,393	-	col4a4	Y	Y	COL4A4	Y
GBT0281	RP2.1	chr10:45,322,058-45,322,066	+	ogdhb	Y	Y	OGDH	Y
GBT0283	RP2.1	chr24:25,730,085-25,743,028	+	sh3kbp1			SH3KBP1	Y
GBT0286	RP2.1	chr5:24,472,500-24,472,508	-	emid1		Y	EMID1
GBT0298	RP2.1	chr3:704,195-704,203	+	zgc:194659	Y	Y	No ortholog
GBT0308	RP2.1	chr4:57,338,823-57,338,831	+	si:ch211-241n15.3	Y	Y	No ortholog
GBT0312	RP2.1	chr2:18,076,100-18,076,108	-	ptprfb	Y	Y	PTPRF	Y
GBT0313	RP2.1	chr19:36,560,005-36,560,013	-	csmd2		Y	CSMD2
GBT0316	RP2.1	chr12:13,870,717-13,870,724	+	fkbp10b		Y	FKBP10	Y
GBT0319/GBT0321	RP2.1	chr16:26,979,806-26,979,814	-	ino80c	Y	Y	INO80C
GBT0322	RP2.1	chr21:32,182,533-32,182,541	-	si:ch211-160j14.3		Y	COL23A1
GBT0323	RP2.1	chr24:3,712,668-3,712,676	-	adarb2		Y	ADARB2
GBT0325	RP2.1	chr11:41,137,656-41,137,664	-	megf6b	Y	Y	MEGF6
GBT0329	RP2.1	chr10:8,386,843-8,386,851	-	csgalnact1a		Y	CSGALNACT1
GBT0340	RP2.1	chr7:34,644,188-34,644,735	-	nfatc3a	Y	Y	NFATC3
GBT0346	RP2.1	chr13:16,857,594-16,857,602	-	lrmda	Y	Y	LRMDA	Y
GBT0348	RP2.1	chr18:35,557,234-35,557,310	-	ryr1b		Y	RYR1	Y
GBT0357	RP2.1	chr6:46,058,204-46,058,212	-	ca16b		Y	PTPRG
GBT0364	RP2.1	chr10:7,858,477-7,858,499	-	mat2aa		Y	MAT2A
GBT0365	RP2.1	chr12:25,817,489-25,817,706	-	sncgb		Y	SNCG
GBT0369	RP2.1	chr1:37,986,370-37,986,378	-	gpm6ab		Y	GPM6A
GBT0380	RP2.1	chr4:29,417,718-29,417,726	+	znf1140	Y	Y	No ortholog
GBT0383	RP2.1	chr20:22,357,310-22,357,318	+	kdr			KDR	Y
GBT0389	RP2.1	chr12:10,383,817-10,383,825	-	mosmob	Y	Y	MOSMO
GBT0396	RP2.1	chr16:24,808,859-24,808,867	+	smg9	Y	Y	SMG9	Y
GBT0397	RP2.1	chr16:34,288,318-34,288,326	-	phactr4b		Y	PHACTR4
GBT0398	RP2.1	chr21:13,518,011-13,518,019	-	pnpla7a		Y	PNPLA7
GBT0399	RP2.1	chr10:39,654,342-39,654,350	+	kirrel3a	Y	Y	KIRREL3
GBT0401	RP2.1	chr4:8,397,540-8,397,548	+	erc1b		Y	ERC1
GBT0402	RP2.1	chr4:1,773,887-1,773,895	+	scaf11	Y	Y	SCAF11
GBT0404	RP2.1	chr22:36,551,731-36,551,739	-	LOC564731			No ortholog
GBT0405	RP2.1	chr5:38,544,254-38,544,262	+	si:ch211-191a6.3	Y	Y	No ortholog
GBT0409	RP8.1	chr5:54,008,293-54,008,301	+	npr2		Y	NPR2	Y
GBT0410	RP2.1	chr2:58,454,900-58,455,101	+	vapal		Y	VAPA
GBT0411	RP2.1	chr7:40,285,794-40,286,503	-	dnajb6b			DNAJB6	Y
GBT0412	RP2.1	chr10:20,113,134-20,113,338	+	xpo7		Y	XPO7
GBT0415	RP2.1	chr21:14,653,010-14,653,165	-	arrdc1b		Y	ARRDC1
GBT0416	RP2.1	chr24:19,573,764-19,573,965	-	csrnp1b		Y	CSRNP1
GBT0419	RP2.1	chr21:17,731,795-17,731,995	+	rxraa		Y	RXRA
GBT0422	RP2.1	chr22:10,910,288-10,910,661	-	insrb			INSR	Y
GBT0424	RP2.1	chr18:34,255,396-34,255,597	+	v2rl1		Y	No ortholog
GBT0425	RP2.1	chr19:30,836,294-30,836,498	+	mrps18b		Y	MRPS18B
GBT0433	RP8.1	chr18:50,963,416-50,963,424	+	ddb1		Y	DDB1
GBT0434	RP8.1	chr14:43,203,527-43,203,535	-	gar1		Y	GAR1
GBT0435	RP8.1	chr21:27,800,841-27,803,101	-	nrxn2a		Y	NRXN2
GBT0437	RP8.1	chr2:38,065,908-38,065,916	+	casq1a		Y	CASQ1	Y
GBT0500	RP8.1	chr4:47,697,273-47,697,281	+	si:dkey-5i16.5	Y	Y	No ortholog
GBT0503	RP2.1	chr22:12,780,384-12,780,392	+	stat1a	Y	Y	STAT1	Y
GBT0506	RP2.1	chr1:1,119,289-1,120,188	-	Unannotated coding sequence*		Y
GBT0510	RP2.1	chr17:15,476,699-15,476,707	-	si:ch211-266g18.10		Y	TRDN	Y
GBT0511	RP2.1	chr6:37,966,850-37,966,858	+	oca2		Y	OCA2	Y
GBT0513	RP2.1	chr12:36,423,511-36,423,519	+	map2k6		Y	MAP2K6
GBT0520	RP2.1	chr22:15,484,429-15,484,437	+	gpc1a	Y	Y	GPC1
GBT0522	RP2.1	chr1:25,157,973-25,157,981	+	fabp2			FABP2
GBT0523	RP2.1	chr13:46,041,116-46,041,124	+	marcksl1a		Y	MARCKSL1
GBT0525	RP8.1	chr7:72,138,690-72,138,698	+	mapk8ip1b		Y	MAPK8IP1	Y
GBT0527	RP8.1	chr3:18,038,929-18,038,937	-	tob1a		Y	TOB1
GBT0528	RP8.1	chr21:23,192,994-23,193,002	-	zbtb16a		Y	ZBTB16	Y
GBT0534	RP2.1	chr18:44,685,388-44,685,396	+	napab		Y	NAPA
GBT0545	RP2.1	chr24:21,416,777-21,416,785	+	wasf3b	Y	Y	WASF3
GBT0552	RP2.1	chr4:71,910,902-71,910,910	-	znf1015		Y	ZNF579
GBT0554	RP2.1	chr13:25,269,620-25,269,628	+	gsto2	Y	Y	GSTO2
GBT0570	RP2.1	chr9:37,385,465-37,385,473	+	gli2a		Y	GLI2	Y
GBT0572	RP2.1	chr9:48,951,260-48,951,268	+	lrp2a			LRP2	Y
GBT0573	RP2.1	chr6:33,630,487-33,630,495	-	Unannotated coding sequence	Y	Y
GBT0585	RP2.1	chr20:22,471,474-22,471,482	-	kita		Y	KIT	Y
GBT0586	RP2.1	chr13:9,112,806-9,112,814	-	Unannotated coding sequence	Y	Y
GBT0591	RP2.1	chr8:4,503,257-4,503,265	-	dhx37		Y	DHX37
GBT0593	RP8.1	chr21:45,305,084-45,305,092	-	skp1		Y	SKP1
GBT0599	RP8.1	chr13:4,609,096-4,609,104	-	mcu		Y	MCU
GBT0700	RP8.1	chr18:20,857,138-20,857,146	+	ttc23		Y	TTC23
GBT0710	RP2.1	chr4:23,128,236-23,128,244	-	magi2a		Y	MAGI2	Y
GBT0717	RP2.1	chr7:17,711,580-17,711,588	+	taf6l		Y	TAF6L
GBT0722	RP2.1	chr2:42,671,135-42,671,143	-	dip2cb	Y	Y	DIP2C
GBT0724	RP8.1	chr7:7,633,071-7,633,079	+	Unannotated coding sequence*		Y
GBT0726	RP8.1	chr5:22,334,791-22,334,799	+	radx	Y	Y	RADX
GBT0734	RP2.1	chr22:1,929,973-1,929,981	+	znf1144	Y	Y	No ortholog
GBT0750	RP2.1	chr6:40,191,798-40,191,806	-	col7a1	Y	Y	COL7A1	Y
GBT0757	RP2.1	chr3:17,528,304-17,528,312	+	kat2a		Y	KAT2A
GBT0760	RP2.1	chr2:1,433,350-1,433,358	+	adgrl2b.1	Y	Y	ADGRL2
GBT0776	RP2.1	chr9:56,048,012-56,048,019	+	edar		Y	EDAR	Y
GBT0785	RP2.1	chr16:32,064,336-32,064,344	+	mboat7		Y	MBOAT7	Y
GBT0902	RP2.1	chr18:17,891,640-17,891,648	+	si:ch211-216l23.1	Y	Y	No ortholog
GBT0906	RP2.1	chr15:20,572,804-20,572,812	-	timm50		Y	TIMM50	Y
GBT0926	RP2.1	chr14:627,344-627,352	+	dele1	Y	Y	DELE1
GBT0936	RP2.1	chr23:31,545,083-31,546,323	-	eya4		Y	EYA4	Y
GBT0941	RP2.1	chr10:45,421,557-45,421,565	+	zmiz2		Y	ZMIZ2
GBT0951	RP2.1	chr13:34,378,247-34,378,255	+	macrod2		Y	MACROD2
GBT0958	RP2.1	chr8:48,151,156-48,151,164	+	si:ch211-263k4.2	Y	Y	No ortholog
GBT0959	RP2.1	chr23:19,881,311-19,881,319	+	flna	Y	Y	FLNA	Y
GBT0966	RP2.1	chr2:52,648,970-52,648,978	+	plpp2a	Y	Y	PLPP2
GBT0972	RP2.1	chr6:30,050,240-30,050,248	+	dlg1			DLG1
GBT0980	RP2.1	chr20:34,381,545-34,381,553	-	hmcn1d		Y	HMCN1d	Y
GBT0993	RP2.1	chr3:48,443,605-48,443,613	-	cdip1	Y	Y	CDIP1
GBT1023	RP2.1	chr3:36,076,445-36,076,453	-	csnk1da		Y	CSNK1D	Y
GBT1024	RP2.1	chr25:5,175,242-5,175,250	+	Unannotated coding sequence*	Y	Y
GBT1027	RP8.1	chr15:37,042,068-37,042,075	+	kirrel3l		Y	KIRREL2
GBT1033	RP8.1	chr2:21,343,550-21,343,558	+	rreb1b		Y	RREB1
GBT1036	RP2.1	chr5:36,219,415-36,219,423	+	mark4a		Y	MARK4
GBT1042	RP8.1	chr9:15,087,584-15,087,592	-	pard3bb	Y	Y	PARD3B
GBT1070	RP8.1	chr5:52,300,954-52,300,962	-	zfpl1		Y	ZFPL1
GBT1093	RP2.1	chr12:47,292,160-47,292,168	+	ryr2a		Y	RYR2	Y
GBT1100	RP2.1	chr5:25,509,243-25,509,251	+	Unannotated coding sequence*		Y
GBT1102	RP2.1	chr10:24,237,742-24,237,750	+	gbe1a	Y	Y	GBE1	Y
GBT1105	RP2.1	chr9:21,256,630-21,256,638	-	tbx15			TBX15	Y
GBT1118	RP2.1	chr2:41,702,739-41,702,747	-	d2hgdh	Y	Y	D2HGDH	Y
GBT1129/GBT0584/GBT0994	RP2.1	chr3:39,627,361-39,627,369	+	cacna1ha		Y	CACNA1H	Y
GBT1168	RP2.1	chr5:39,664,405-39,664,412	-	Unannotated coding sequence*	Y	Y
GBT1248	RP2.1	chr24:25,883,824-25,883,836	+	tnk2a		Y	TNK2
GBT1259	RP2.1	chr21:63,590-63,598	+	LOC100537272			No ortholog
GBT1278	RP2.1	chr7:9,064,231-9,065,527	+	selenos	Y	Y	SELENOS
GBT1300	RP2.1	chr20:22,557,973-22,558,383	-	pdgfra		Y	PDGFRA	Y
