# Supplementary material for: Building the vertebrate codex using the gene breaking protein trap library
Source: eLife. 2020 Aug 11;9:e54572. doi: 10.7554/eLife.54572 (PMC7486118; doi:10.7554/eLife.54572)
Supplement: Supplementary file 2. — List of GBT-confirmed line number, tagged gene, a summary of their established phenotype, and references where more detailed characterization of each line can be found. [file elife-54572-supp2.xlsx]

## Sheet: Supplementarty file 2
Line	Zebrafish Gene	Homozygous Phenotype	Reference(s)
GBT0031	tnnt2a	Lethal-Loss of heartbeat	Clark et al., 2011
GBT0101	dido1	Lethal 10-16 DPF	Clark et al., 2011
GBT0237	nrg2a	Lethal 12 DPF, defects in median fin fold ridge cell organization and apical morphology, lack inflated swim bladders	Westcot et al., 2015
GBT0348	ryr1b	Lethal-slow swimming	Clark et al., 2011
GBT0364	mat2aa	Lethal-cardiac edema at 3 DPF	Clark et al., 2011; Ding et al., 2013; Ding et al., 2016
GBT0425	mrps18b	Lethal 12 DPF-shorter body length at 8-10 dpf, reduced heart function	Ding et al., 2013; Ding et al., 2016
GBT1300	pdgfra	Lethal 14 DPF, abnormal cardiac morphology, craniofacial defects	El-Rass et al., 2017
GBT0007	nrde2	Reduced adult viability	Clark et al., 2011
GBT0078	grip1	Reduced adult viability	Clark et al., 2011; Westcot et al., 2015
GBT0039	gabbr1.2	Reduction in nicotine response	Clark et al., 2011
GBT0156	fras1	Blistering & collapse of fin tissue	Clark et al., 2011; Westcot et al., 2015
GBT0263	hmcn1	Blistering & collapse of fin tissue	Westcot et al., 2015
GBT0776	edar	Finless	Hatzold J et al., unpublished
GBT0002	sorbs2b	Accelerated doxorubicin-induced death in adult fish, not observed through 5 DPF	Clark et al., 2011; Ding et al., 2016
GBT0268	ano5a	Accelerated doxorubicin-induced death in adult fish, homozygous viable	Ding et al., 2016
GBT0411	dnajb6b	Adult cardiac hypertrophy, accelerated doxorubicin-induced death in adult fish	Ding et al., 2013; Ding et al., 2016
GBT0419	rxraa	Reduced doxorubicin-induced death in adult fish, homozygous viable	Ding et al., 2013; Ding et al., 2016; Ma et al., 2020
