# Supplementary material for: Building the vertebrate codex using the gene breaking protein trap library
Source: eLife. 2020 Aug 11;9:e54572. doi: 10.7554/eLife.54572 (PMC7486118; doi:10.7554/eLife.54572)
Supplement: Supplementary file 3. — Established models of 32 human genetic disorders associated with 24 human orthologs of the GBT-tagged genes are generated by alternative genetic approaches in zebrafish and mice. This table listed the GBT ID of the tagged genes, both zebrafish tagged genes and their human orthologs, disease association of the human orthologs, disease ontology ID, number of models in zebrafish and mice listed in ZFIN (http://zfin.org/)(Ruzicka et al., 2019) and MGI (http://www.informatics.jax.org)(Bult et al., 2019) databases and references. [file elife-54572-supp3.xlsx]

## Sheet: Zebrafish disease model 190331
GBT	Zebrafish Gene Symbol	Zebrafish Gene ID	Human Ortholog Entrez Gene Id	Human Ortholog Symbol	DO Term Name	DO Term ID	OMIM Term Name	OMIM ID	Evidence Code	Publication	Zebrafish disease models	Pubmed ID	ZFIN Pub ID
GBT0010	cdh11	ZDB-GENE-980526-170	1009	CDH11			Elsahy-Waters syndrome	211380	ECO:0000266	ZDB-PUB-170210-12	No data available
GBT0016	pbx1a	ZDB-GENE-000405-1	5087	PBX1			Congenital anomalies of kidney and urinary tract syndrome with or without hearing loss, abnormal ears, or developmental delay	617641	ECO:0000266	ZDB-PUB-170210-12	No data available
GBT0031	tnnt2a	ZDB-GENE-000626-1	7139	TNNT2	dilated cardiomyopathy 1D	DOID:0110426	Cardiomyopathy, dilated, 1D	601494	ECO:0000266	ZDB-PUB-170210-12	No data available
GBT0031	tnnt2a	ZDB-GENE-000626-1	7139	TNNT2	dilated cardiomyopathy 1D	DOID:0110426	Left ventricular noncompaction 6	601494	ECO:0000266	ZDB-PUB-170210-12	No data available
GBT0031	tnnt2a	ZDB-GENE-000626-1	7139	TNNT2	hypertrophic cardiomyopathy 2	DOID:0110308	Cardiomyopathy, hypertrophic, 2	115195	ECO:0000266	ZDB-PUB-170210-12	1	22198505	ZDB-PUB-120109-7
GBT0031	tnnt2a	ZDB-GENE-000626-1	7139	TNNT2	restrictive cardiomyopathy	DOID:397	Cardiomyopathy, familial restrictive, 3	612422	ECO:0000266	ZDB-PUB-170210-12	No data available
GBT0070	mcm9	ZDB-GENE-041014-310	254394	MCM9	ovarian dysgenesis 4	DOID:0080496	Ovarian dysgenesis 4	616185	ECO:0000266	ZDB-PUB-170210-12	No data available
GBT0078	grip1	ZDB-GENE-041210-125	23426	GRIP1			Fraser syndrome 3	617667	ECO:0000266	ZDB-PUB-170210-12	No data available
GBT0111	rerea	ZDB-GENE-060718-1	473	RERE			Neurodevelopmental disorder with or without anomalies of the brain, eye, or heart	616975	ECO:0000266	ZDB-PUB-170210-12	No data available
GBT0131	ddb2	ZDB-GENE-050419-169	1643	DDB2	xeroderma pigmentosum group E	DOID:0110846	Xeroderma pigmentosum, group E, DDB-negative subtype	278740	ECO:0000266	ZDB-PUB-170210-12	No data available
GBT0133	zic2a	ZDB-GENE-000710-4	7546	ZIC2	holoprosencephaly 5	DOID:0110878	Holoprosencephaly 5	609637	ECO:0000266	ZDB-PUB-170210-12	No data available
GBT0135	bhlhe41	ZDB-GENE-050419-146	79365	BHLHE41			[Short sleeper]	612975	ECO:0000266	ZDB-PUB-170210-12	No data available
GBT0156	fras1	ZDB-GENE-060526-68	80144	FRAS1			Fraser syndrome 1	219000	ECO:0000266	ZDB-PUB-170210-12	No data available
GBT0170	glcci1a	ZDB-GENE-031010-41	113263	GLCCI1			{Glucocorticoid therapy, response to}	614400	ECO:0000266	ZDB-PUB-170210-12	No data available
GBT0178	ada	ZDB-GENE-040718-393	100	ADA	adenosine deaminase deficiency	DOID:5810	Adenosine deaminase deficiency, partial	102700	ECO:0000266	ZDB-PUB-170210-12	No data available
GBT0178	ada	ZDB-GENE-040718-393	100	ADA	adenosine deaminase deficiency	DOID:5810	Severe combined immunodeficiency due to ADA deficiency	102700	ECO:0000266	ZDB-PUB-170210-12	No data available
GBT0181	tenm3	ZDB-GENE-990714-19	55714	TENM3			Microphthalmia, isolated, with coloboma 9	615145	ECO:0000266	ZDB-PUB-170210-12	No data available
GBT0186	cacna1c	ZDB-GENE-020129-1	775	CACNA1C	Brugada syndrome 3	DOID:0110220	Brugada syndrome 3	611875	ECO:0000266	ZDB-PUB-170210-12	No data available
GBT0186	cacna1c	ZDB-GENE-020129-1	775	CACNA1C	Timothy syndrome	DOID:0060173	Timothy syndrome	601005	ECO:0000266	ZDB-PUB-170210-12	No data available
GBT0208	actn2b	ZDB-GENE-051127-39	88	ACTN2	dilated cardiomyopathy 1AA	DOID:0110428	Cardiomyopathy, dilated, 1AA, with or without LVNC	612158	ECO:0000266	ZDB-PUB-170210-12	No data available
GBT0209	dph1	ZDB-GENE-050417-411	1801	DPH1			Developmental delay with short stature, dysmorphic features, and sparse hair	616901	ECO:0000266	ZDB-PUB-170210-12	No data available
GBT0230	jam3a	ZDB-GENE-070424-177	83700	JAM3			Hemorrhagic destruction of the brain, subependymal calcification, and cataracts	613730	ECO:0000266	ZDB-PUB-170210-12	No data available
GBT0235	lrpprc	ZDB-GENE-030131-7887	10128	LRPPRC	Leigh disease	DOID:3652	Leigh syndrome, French-Canadian type	220111	ECO:0000266	ZDB-PUB-170210-12	No data available
GBT0238	tgfbr1b	ZDB-GENE-091027-1	7046	TGFBR1			{Multiple self-healing squamous epithelioma, susceptibility to}	132800	ECO:0000266	ZDB-PUB-170210-12	No data available
GBT0238	tgfbr1b	ZDB-GENE-091027-1	7046	TGFBR1	Loeys-Dietz syndrome	DOID:0050466	Loeys-Dietz syndrome 1	609192	ECO:0000266	ZDB-PUB-170210-12	No data available
GBT0238	tgfbr1b	ZDB-GENE-091027-1	7046	TGFBR1	Loeys-Dietz syndrome 1	DOID:0070235	Loeys-Dietz syndrome 1	609192	ECO:0000266	ZDB-PUB-170210-12	No data available
GBT0240	bcl11ba	ZDB-GENE-061207-62	64919	BCL11B			Immunodeficiency 49	617237	ECO:0000266	ZDB-PUB-170210-12	No data available
GBT0240	bcl11ba	ZDB-GENE-061207-62	64919	BCL11B			Intellectual developmental disorder with dysmorphic facies, speech delay, and T-cell abnormalities	618092	ECO:0000266	ZDB-PUB-170210-12	No data available
GBT0251	foxl2a	ZDB-GENE-060512-241	668	FOXL2	blepharophimosis, ptosis, and epicanthus inversus syndrome	DOID:14778	Blepharophimosis, epicanthus inversus, and ptosis, type 1	110100	ECO:0000266	ZDB-PUB-170210-12	No data available
GBT0251	foxl2a	ZDB-GENE-060512-241	668	FOXL2	premature ovarian failure	DOID:5426	Premature ovarian failure 3	608996	ECO:0000266	ZDB-PUB-170210-12	No data available
GBT0263	hmcn1	ZDB-GENE-041014-322	83872	HMCN1	age related macular degeneration 1	DOID:0110014	{Macular degeneration, age-related, 1}	603075	ECO:0000266	ZDB-PUB-170210-12	No data available
GBT0268	ano5a	ZDB-GENE-091013-2	203859	ANO5			Gnathodiaphyseal dysplasia	166260	ECO:0000266	ZDB-PUB-170210-12	No data available
GBT0268	ano5a	ZDB-GENE-091013-2	203859	ANO5	autosomal recessive limb-girdle muscular dystrophy type 2L	DOID:0110284	Muscular dystrophy, limb-girdle, autosomal recessive 12	611307	ECO:0000266	ZDB-PUB-170210-12	No data available
GBT0268	ano5a	ZDB-GENE-091013-2	203859	ANO5	Miyoshi muscular dystrophy 3	DOID:0070201	Miyoshi muscular dystrophy 3	613319	ECO:0000266	ZDB-PUB-170210-12	No data available
GBT0270	zfpm2a	ZDB-GENE-060130-4	23414	ZFPM2	46 XY gonadal dysgenesis	DOID:14448	46XY sex reversal 9	616067	ECO:0000266	ZDB-PUB-170210-12	No data available
GBT0270	zfpm2a	ZDB-GENE-060130-4	23414	ZFPM2	congenital diaphragmatic hernia	DOID:3827	Diaphragmatic hernia 3	610187	ECO:0000266	ZDB-PUB-170210-12	No data available
GBT0270	zfpm2a	ZDB-GENE-060130-4	23414	ZFPM2	tetralogy of Fallot	DOID:6419	Tetralogy of Fallot	187500	ECO:0000266	ZDB-PUB-170210-12	No data available
GBT0275	col4a4	ZDB-GENE-101001-1	1286	COL4A4			Hematuria, familial benign	141200	ECO:0000266	ZDB-PUB-170210-12	No data available
GBT0275	col4a4	ZDB-GENE-101001-1	1286	COL4A4	autosomal recessive Alport syndrome	DOID:0110033	Alport syndrome 2, autosomal recessive	203780	ECO:0000266	ZDB-PUB-170210-12	No data available
GBT0281	ogdhb	ZDB-GENE-090311-8	4967	OGDH			Alpha-ketoglutarate dehydrogenase deficiency	203740	ECO:0000266	ZDB-PUB-170210-12	No data available
GBT0312	ptprfb	ZDB-GENE-060503-530	5792	PTPRF			?Breasts and/or nipples, aplasia or hypoplasia of, 2	616001	ECO:0000266	ZDB-PUB-170210-12	No data available
GBT0316	fkbp10b	ZDB-GENE-030131-3101	60681	FKBP10	Bruck syndrome	DOID:0060231	Bruck syndrome 1	259450	ECO:0000266	ZDB-PUB-170210-12	No data available
GBT0316	fkbp10b	ZDB-GENE-030131-3101	60681	FKBP10	osteogenesis imperfecta type 11	DOID:0110351	Osteogenesis imperfecta, type XI	610968	ECO:0000266	ZDB-PUB-170210-12	No data available
GBT0346	lrmda	ZDB-GENE-050522-285	83938	LRMDA	oculocutaneous albinism type VII	DOID:0070100	Albinism, oculocutaneous, type VII	615179	ECO:0000266	ZDB-PUB-170210-12	No data available
GBT0348	ryr1b	ZDB-GENE-070705-417	6261	RYR1			King-Denborough syndrome	145600	ECO:0000266	ZDB-PUB-170210-12	No data available
GBT0348	ryr1b	ZDB-GENE-070705-417	6261	RYR1			{Malignant hyperthermia susceptibility 1}	145600	ECO:0000266	ZDB-PUB-170210-12	No data available
GBT0348	ryr1b	ZDB-GENE-070705-417	6261	RYR1			Minicore myopathy with external ophthalmoplegia	255320	ECO:0000266	ZDB-PUB-170210-12	No data available
GBT0348	ryr1b	ZDB-GENE-070705-417	6261	RYR1	central core myopathy	DOID:3529	Central core disease	117000	ECO:0000266	ZDB-PUB-170210-12	No data available
GBT0348	ryr1b	ZDB-GENE-070705-417	6261	RYR1	central core myopathy	DOID:3529	Neuromuscular disease, congenital, with uniform type 1 fiber	117000	ECO:0000266	ZDB-PUB-170210-12	No data available
GBT0383	kdr	ZDB-GENE-041001-112	3791	KDR			Hemangioma, capillary infantile, somatic	602089	ECO:0000266	ZDB-PUB-170210-12	No data available
GBT0396	smg9	ZDB-GENE-030131-9385	56006	SMG9			Heart and brain malformation syndrome	616920	ECO:0000266	ZDB-PUB-170210-12	No data available
GBT0409	npr2	ZDB-GENE-141030-2	4882	NPR2			Short stature with nonspecific skeletal abnormalities	616255	ECO:0000266	ZDB-PUB-170210-12	No data available
GBT0409	npr2	ZDB-GENE-141030-2	4882	NPR2	acromesomelic dysplasia, Maroteaux type	DOID:0080050	Acromesomelic dysplasia, Maroteaux type	602875	ECO:0000266	ZDB-PUB-170210-12	No data available
GBT0409	npr2	ZDB-GENE-141030-2	4882	NPR2	Miura type epiphyseal chondrodysplasia	DOID:0070316	Epiphyseal chondrodysplasia, Miura type	615923	ECO:0000266	ZDB-PUB-170210-12	No data available
GBT0411	dnajb6b	ZDB-GENE-040426-1122	10049	DNAJB6	autosomal dominant limb-girdle muscular dystrophy type 1	DOID:0110305	Muscular dystrophy, limb-girdle, autosomal dominant 1	603511	ECO:0000266	ZDB-PUB-170210-12	No data available
GBT0422	insrb	ZDB-GENE-020503-4	3643	INSR			Diabetes mellitus, insulin-resistant, with acanthosis nigricans	610549	ECO:0000266	ZDB-PUB-170210-12	No data available
GBT0422	insrb	ZDB-GENE-020503-4	3643	INSR			Rabson-Mendenhall syndrome	262190	ECO:0000266	ZDB-PUB-170210-12	No data available
GBT0422	insrb	ZDB-GENE-020503-4	3643	INSR	Donohue syndrome	DOID:0050470	Leprechaunism	246200	ECO:0000266	ZDB-PUB-170210-12	No data available
GBT0422	insrb	ZDB-GENE-020503-4	3643	INSR	familial hyperinsulinemic hypoglycemia 5	DOID:0070220	Hyperinsulinemic hypoglycemia, familial, 5	609968	ECO:0000266	ZDB-PUB-170210-12	No data available
GBT0422	insrb	ZDB-GENE-020503-4	3643	INSR	hyperinsulinemic hypoglycemia	DOID:13317	Hyperinsulinemic hypoglycemia, familial, 5	609968	ECO:0000266	ZDB-PUB-170210-12	No data available
GBT0437	casq1a	ZDB-GENE-040801-139	844	CASQ1			Myopathy, vacuolar, with CASQ1 aggregates	616231	ECO:0000266	ZDB-PUB-170210-12	No data available
GBT0503	stat1a	ZDB-GENE-980526-499	6772	STAT1			Immunodeficiency 31A, mycobacteriosis, autosomal dominant	614892	ECO:0000266	ZDB-PUB-170210-12	No data available
GBT0503	stat1a	ZDB-GENE-980526-499	6772	STAT1			Immunodeficiency 31B, mycobacterial and viral infections, autosomal recessive	613796	ECO:0000266	ZDB-PUB-170210-12	No data available
GBT0503	stat1a	ZDB-GENE-980526-499	6772	STAT1	chronic mucocutaneous candidiasis	DOID:2058	Immunodeficiency 31C, autosomal dominant	614162	ECO:0000266	ZDB-PUB-170210-12	No data available
GBT0511	oca2	ZDB-GENE-070718-4	4948	OCA2			[Skin/hair/eye pigmentation 1, blond/brown hair]	227220	ECO:0000266	ZDB-PUB-170210-12	No data available
GBT0511	oca2	ZDB-GENE-070718-4	4948	OCA2			[Skin/hair/eye pigmentation 1, blue/nonblue eyes]	227220	ECO:0000266	ZDB-PUB-170210-12	No data available
GBT0511	oca2	ZDB-GENE-070718-4	4948	OCA2	oculocutaneous albinism	DOID:0050632	Albinism, brown oculocutaneous	203200	ECO:0000266	ZDB-PUB-170210-12	No data available
GBT0511	oca2	ZDB-GENE-070718-4	4948	OCA2	oculocutaneous albinism	DOID:0050632	Albinism, oculocutaneous, type II	203200	ECO:0000266	ZDB-PUB-170210-12	No data available
GBT0511	oca2	ZDB-GENE-070718-4	4948	OCA2	oculocutaneous albinism type II	DOID:0070096	Albinism, brown oculocutaneous	203200	ECO:0000266	ZDB-PUB-170210-12	No data available
GBT0511	oca2	ZDB-GENE-070718-4	4948	OCA2	oculocutaneous albinism type II	DOID:0070096	Albinism, oculocutaneous, type II	203200	ECO:0000266	ZDB-PUB-170210-12	No data available
GBT0525	mapk8ip1b	ZDB-GENE-170525-1	9479	MAPK8IP1	type 2 diabetes mellitus	DOID:9352	{Diabetes mellitus, noninsulin-dependent}	125853	ECO:0000266	ZDB-PUB-170210-12	No data available
GBT0528	zbtb16a	ZDB-GENE-030131-1989	7704	ZBTB16			Leukemia, acute promyelocytic, PL2F/RARA type		ECO:0000266	ZDB-PUB-170210-12	No data available
GBT0528	zbtb16a	ZDB-GENE-030131-1989	7704	ZBTB16			Skeletal defects, genital hypoplasia, and mental retardation	612447	ECO:0000266	ZDB-PUB-170210-12	No data available
GBT0570	gli2a	ZDB-GENE-990706-8	2736	GLI2	Culler-Jones syndrome	DOID:0080328	Culler-Jones syndrome	615849	ECO:0000266	ZDB-PUB-170210-12	No data available
GBT0570	gli2a	ZDB-GENE-990706-8	2736	GLI2	holoprosencephaly 9	DOID:0110873	Holoprosencephaly 9	610829	ECO:0000266	ZDB-PUB-170210-12	No data available
GBT0572	lrp2a	ZDB-GENE-050119-2	4036	LRP2	Donnai-Barrow syndrome	DOID:0090144	Donnai-Barrow syndrome	222448	ECO:0000266	ZDB-PUB-170210-12	No data available
GBT0585	kita	ZDB-GENE-980526-464	3815	KIT	acute myeloid leukemia	DOID:9119	Leukemia, acute myeloid	601626	ECO:0000266	ZDB-PUB-170210-12	No data available
GBT0585	kita	ZDB-GENE-980526-464	3815	KIT	gastrointestinal stromal tumor	DOID:9253	Gastrointestinal stromal tumor, familial	606764	ECO:0000266	ZDB-PUB-170210-12	No data available
GBT0585	kita	ZDB-GENE-980526-464	3815	KIT	mastocytosis	DOID:350	Mastocytosis, cutaneous	154800	ECO:0000266	ZDB-PUB-170210-12	No data available
GBT0585	kita	ZDB-GENE-980526-464	3815	KIT	mastocytosis	DOID:350	Mastocytosis, systemic, somatic	154800	ECO:0000266	ZDB-PUB-170210-12	No data available
GBT0585	kita	ZDB-GENE-980526-464	3815	KIT	piebaldism	DOID:3263	Piebaldism	172800	ECO:0000266	ZDB-PUB-170210-12	No data available
GBT0585	kita	ZDB-GENE-980526-464	3815	KIT	seminoma	DOID:4440	Germ cell tumors, somatic	273300	ECO:0000266	ZDB-PUB-170210-12	No data available
GBT0585	kita	ZDB-GENE-980526-464	3815	KIT	testicular cancer	DOID:2998	Germ cell tumors, somatic	273300	ECO:0000266	ZDB-PUB-170210-12	No data available
GBT0585	kita	ZDB-GENE-980526-464	3815	KIT	testicular germ cell cancer	DOID:5557	Germ cell tumors, somatic	273300	ECO:0000266	ZDB-PUB-170210-12	No data available
GBT0710	magi2a	ZDB-GENE-050810-4	9863	MAGI2	nephrotic syndrome type 15	DOID:0080271	Nephrotic syndrome, type 15	617609	ECO:0000266	ZDB-PUB-170210-12	No data available
GBT0750	col7a1	ZDB-GENE-030131-2427	1294	COL7A1			EBD, Bart type	132000	ECO:0000266	ZDB-PUB-170210-12	No data available
GBT0750	col7a1	ZDB-GENE-030131-2427	1294	COL7A1			EBD, localisata variant		ECO:0000266	ZDB-PUB-170210-12	No data available
GBT0750	col7a1	ZDB-GENE-030131-2427	1294	COL7A1			Epidermolysis bullosa, pretibial	131850	ECO:0000266	ZDB-PUB-170210-12	No data available
GBT0750	col7a1	ZDB-GENE-030131-2427	1294	COL7A1			Epidermolysis bullosa pruriginosa	604129	ECO:0000266	ZDB-PUB-170210-12	No data available
GBT0750	col7a1	ZDB-GENE-030131-2427	1294	COL7A1			Transient bullous of the newborn	131705	ECO:0000266	ZDB-PUB-170210-12	No data available
GBT0750	col7a1	ZDB-GENE-030131-2427	1294	COL7A1	autosomal dominant dystrophic epidermolysis bullosa	DOID:0080224	Epidermolysis bullosa dystrophica, AD	131750	ECO:0000266	ZDB-PUB-170210-12	No data available
GBT0750	col7a1	ZDB-GENE-030131-2427	1294	COL7A1	nonsyndromic congenital nail disorder 8	DOID:0080086	Toenail dystrophy, isolated	607523	ECO:0000266	ZDB-PUB-170210-12	No data available
GBT0750	col7a1	ZDB-GENE-030131-2427	1294	COL7A1	recessive dystrophic epidermolysis bullosa	DOID:0060642	EBD inversa	226600	ECO:0000266	ZDB-PUB-170210-12	No data available
GBT0750	col7a1	ZDB-GENE-030131-2427	1294	COL7A1	recessive dystrophic epidermolysis bullosa	DOID:0060642	Epidermolysis bullosa dystrophica, AR	226600	ECO:0000266	ZDB-PUB-170210-12	No data available
GBT0776	edar	ZDB-GENE-070117-2062	10913	EDAR			[Hair morphology 1, hair thickness]	612630	ECO:0000266	ZDB-PUB-170210-12	No data available
GBT0776	edar	ZDB-GENE-070117-2062	10913	EDAR	hypohidrotic ectodermal dysplasia	DOID:14793	Ectodermal dysplasia 10A, hypohidrotic/hair/nail type, autosomal dominant	129490	ECO:0000266	ZDB-PUB-170210-12	No data available
GBT0776	edar	ZDB-GENE-070117-2062	10913	EDAR	hypohidrotic ectodermal dysplasia	DOID:14793	Ectodermal dysplasia 10B, hypohidrotic/hair/tooth type, autosomal recessive	224900	ECO:0000266	ZDB-PUB-170210-12	No data available
GBT0785	mboat7	ZDB-GENE-040426-1516	79143	MBOAT7			Mental retardation, autosomal recessive 57	617188	ECO:0000266	ZDB-PUB-170210-12	No data available
GBT0906	timm50	ZDB-GENE-040426-1618	92609	TIMM50	3-methylglutaconic aciduria type IX	DOID:0070002	3-methylglutaconic aciduria, type IX	617698	ECO:0000266	ZDB-PUB-170210-12	No data available
GBT0936	eya4	ZDB-GENE-050327-93	2070	EYA4	autosomal dominant nonsyndromic deafness 10	DOID:0110542	Deafness, autosomal dominant 10	601316	ECO:0000266	ZDB-PUB-170210-12	No data available
GBT0936	eya4	ZDB-GENE-050327-93	2070	EYA4	dilated cardiomyopathy 1J	DOID:0110440	?Cardiomyopathy, dilated, 1J	605362	ECO:0000266	ZDB-PUB-170210-12	No data available
GBT0959	flna	ZDB-GENE-030131-2145	2316	FLNA			Cardiac valvular dysplasia, X-linked	314400	ECO:0000266	ZDB-PUB-170210-12	No data available
GBT0959	flna	ZDB-GENE-030131-2145	2316	FLNA			Congenital short bowel syndrome	300048	ECO:0000266	ZDB-PUB-170210-12	No data available
GBT0959	flna	ZDB-GENE-030131-2145	2316	FLNA			Frontometaphyseal dysplasia 1	305620	ECO:0000266	ZDB-PUB-170210-12	No data available
GBT0959	flna	ZDB-GENE-030131-2145	2316	FLNA			Intestinal pseudoobstruction, neuronal	300048	ECO:0000266	ZDB-PUB-170210-12	No data available
GBT0959	flna	ZDB-GENE-030131-2145	2316	FLNA			Melnick-Needles syndrome	309350	ECO:0000266	ZDB-PUB-170210-12	No data available
GBT0959	flna	ZDB-GENE-030131-2145	2316	FLNA			Otopalatodigital syndrome, type I	311300	ECO:0000266	ZDB-PUB-170210-12	No data available
GBT0959	flna	ZDB-GENE-030131-2145	2316	FLNA			Otopalatodigital syndrome, type II	304120	ECO:0000266	ZDB-PUB-170210-12	No data available
GBT0959	flna	ZDB-GENE-030131-2145	2316	FLNA			Terminal osseous dysplasia	300244	ECO:0000266	ZDB-PUB-170210-12	No data available
GBT0959	flna	ZDB-GENE-030131-2145	2316	FLNA	FG syndrome	DOID:14711	?FG syndrome 2	300321	ECO:0000266	ZDB-PUB-170210-12	No data available
GBT0959	flna	ZDB-GENE-030131-2145	2316	FLNA	periventricular nodular heterotopia	DOID:0050454	Heterotopia, periventricular, 1	300049	ECO:0000266	ZDB-PUB-170210-12	No data available
GBT1023	csnk1da	ZDB-GENE-030131-825	1453	CSNK1D	advanced sleep phase syndrome 2	DOID:0110012	Advanced sleep-phase syndrome, familial, 2	615224	ECO:0000266	ZDB-PUB-170210-12	No data available
GBT1093	ryr2a	ZDB-GENE-071001-1	6262	RYR2	arrhythmogenic right ventricular dysplasia 2	DOID:0110071	Arrhythmogenic right ventricular dysplasia 2	600996	ECO:0000266	ZDB-PUB-170210-12	No data available
GBT1093	ryr2a	ZDB-GENE-071001-1	6262	RYR2	catecholaminergic polymorphic ventricular tachycardia 1	DOID:0060675	Ventricular tachycardia, catecholaminergic polymorphic, 1	604772	ECO:0000266	ZDB-PUB-170210-12	No data available
GBT1102	gbe1a	ZDB-GENE-110411-171	2632	GBE1			Polyglucosan body disease, adult form	263570	ECO:0000266	ZDB-PUB-170210-12	No data available
GBT1102	gbe1a	ZDB-GENE-110411-171	2632	GBE1	glycogen storage disease IV	DOID:2750	Glycogen storage disease IV	232500	ECO:0000266	ZDB-PUB-170210-12	No data available
GBT1105	tbx15	ZDB-GENE-020529-1	6913	TBX15			Cousin syndrome	260660	ECO:0000266	ZDB-PUB-170210-12	No data available
GBT1118	d2hgdh	ZDB-GENE-070112-482	728294	D2HGDH	D-2-hydroxyglutaric aciduria	DOID:0050575	D-2-hydroxyglutaric aciduria	600721	ECO:0000266	ZDB-PUB-170210-12	No data available
GBT1129	cacna1ha	ZDB-GENE-130103-1	8912	CACNA1H			{Epilepsy, childhood absence, susceptibility to, 6}	611942	ECO:0000266	ZDB-PUB-170210-12	No data available
GBT1129	cacna1ha	ZDB-GENE-130103-1	8912	CACNA1H			{Epilepsy, idiopathic generalized, susceptibility to, 6}	611942	ECO:0000266	ZDB-PUB-170210-12	No data available
GBT1129	cacna1ha	ZDB-GENE-130103-1	8912	CACNA1H			Hyperaldosteronism, familial, type IV	617027	ECO:0000266	ZDB-PUB-170210-12	No data available
GBT1300	pdgfra	ZDB-GENE-990415-208	5156	PDGFRA			Hypereosinophilic syndrome, idiopathic, resistant to imatinib	607685	ECO:0000266	ZDB-PUB-170210-12	No data available
GBT1300	pdgfra	ZDB-GENE-990415-208	5156	PDGFRA	gastrointestinal stromal tumor	DOID:9253	Gastrointestinal stromal tumor, somatic	606764	ECO:0000266	ZDB-PUB-170210-12	No data available

## Sheet: mouse disease model 191028
GBT	Human EntrezGene ID	Human Gene Symbol	DO Disease ID	DO Disease Name/ OMIM Term	OMIM IDs	Mouse Gene ID	Symbol	Mouse MGI ID	Mouse models	Reference (Pubmed ID)	Aditional Reference (MGI Ref. ID)
GBT0010	1009	CDH11	DOID:0080345	blepharocheilodontic syndrome 1	OMIM:119580				0
GBT0010	1009	CDH11		Elsahy-Waters syndrome	OMIM:211380				0
GBT0016	5087	PBX1		congenital anomalies of kidney and urinary tract syndrome with or without hearing loss, abnormal ears, or developmental delay	OMIM:617641				0
GBT0028	1729	DIAPH1	DOID:0110541	autosomal dominant nonsyndromic deafness 1	OMIM:124900				0
GBT0178	100	ADA	DOID:5810	adenosine deaminase deficiency	OMIM:102700	11486	Ada	MGI:87916	1	9478961	J:73418
GBT0251	668	FOXL2	DOID:14778	blepharophimosis, ptosis, and epicanthus inversus syndrome	OMIM:110100	26927	Foxl2	MGI:1349428	2	14736745, 15056605, 24565867	J:87737, J:90371, J:210665
GBT0031	7139	TNNT2	DOID:397	restrictive cardiomyopathy 3	OMIM:612422				0
GBT0060	3588	IL10RB	DOID:0110909	inflammatory bowel disease 25	OMIM:612567				0
GBT0186	775	CACNA1C	DOID:0060173	Timothy syndrome	OMIM:601005	12288	Cacna1c	MGI:103013	1	30151840, 23010509, 23313911, 21878566	J:176442
GBT0078	23426	GRIP1		Fraser syndrome 3	OMIM:617667				0
GBT0111	473	RERE		neurodevelopmental disorder with or without anomalies of the brain, eye, or heart	OMIM:616975				0
GBT0275	1286	COL4A4	DOID:0110033	autosomal recessive Alport syndrome	OMIM:203780	12829	Col4a4	MGI:104687	4	24522496, 21196518, 24522496	J:223185, J:158794, J:170552, J:223185
GBT0750	1294	COL7A1	DOID:0060642	recessive dystrophic epidermolysis bullosa	OMIM:226600	12836	Col7a1	MGI:88462	4	18382769, 19893033, 10523500	J:136145, J:155326, J:58533
GBT0135	79365	BHLHE41		[Short sleeper]	OMIM:612975				0
GBT0137	1915	EEF1A1	DOID:0070068	autosomal dominant non-syndromic intellectual disability 38	OMIM:616393				0
GBT0137	1915	EEF1A1	DOID:0080463	early infantile epileptic encephalopathy 33	OMIM:616409				0
GBT1023	1453	CSNK1D	DOID:0110012	advanced sleep phase syndrome 2	OMIM:615224	104318	Csnk1d	MGI:1355272	2	15800623	J:97658
GBT0170	113263	GLCCI1		{Glucocorticoid therapy, response to}	OMIM:614400				0
GBT0131	1643	DDB2	DOID:0110846	xeroderma pigmentosum group E	OMIM:278740	107986	Ddb2	MGI:1355314	4	15558025, 14769931	J:88125, J:95633, J:88125, J:95633
GBT0181	55714	TENM3		Microphthalmia, isolated, with coloboma 9	OMIM:615145				0
GBT0186	775	CACNA1C	DOID:0110220	Brugada syndrome 3	OMIM:611875				0
GBT0209	1801	DPH1	DOID:0060469	Miller-Dieker lissencephaly syndrome	OMIM:247200				3	24895408	J:214744
GBT0202	473	RERE		neurodevelopmental disorder with or without anomalies of the brain, eye, or heart	OMIM:616975				0
GBT0208	88	ACTN2	DOID:0110428	dilated cardiomyopathy 1AA	OMIM:612158				0
GBT0959	2316	FLNA	DOID:0050454	periventricular nodular heterotopia	OMIM:300049	192176	Flna	MGI:95556	1	16825286	J:112274
GBT0209	1801	DPH1		Developmental delay with short stature, dysmorphic features, and sparse hair	OMIM:616901				0
GBT0230	83700	JAM3		Hemorrhagic destruction of the brain, subependymal calcification, and cataracts	OMIM: 613730				0
GBT0235	10128	LRPPRC	DOID:3652	French Canadian Leigh disease	OMIM:220111				0
GBT1102	2632	GBE1	DOID:2750	glycogen storage disease IV	OMIM:232500	74185	Gbe1	MGI:1921435	4	21856731, 26385640, 21075835, 21856731	J:176889, J:226481, J:167233, J:176889
GBT0240	64919	BCL11B		Immunodeficiency 49	OMIM:617237				0
GBT0240	64919	BCL11B		Intellectual developmental disorder with dysmorphic facies, speech delay, and T-cell abnormalities	OMIM:618092				0
GBT0249	567	B2M	DOID:0050636	familial visceral amyloidosis	OMIM:105200	12010	B2m	MGI:88127	0
GBT0249	567	B2M		Immunodeficiency 43	OMIM:241600	12010	B2m	MGI:88127	0
GBT0585	3815	KIT	DOID:9253	gastrointestinal stromal tumor	OMIM:606764	16590	Kit	MGI:96677	5	16061643, 18098338, 22652566, 12754375, 16061643	J:100778, J:130890, J:188434, J:83616, J:100778
GBT0251	668	FOXL2	DOID:5426	premature ovarian failure	OMIM:608996				0
GBT0256	5530	PPP3CA	DOID:0080472	infantile or early childhood epileptic encephalopathy 1	OMIM:617711				0
GBT0263	83872	HMCN1	DOID:0110014	age related macular degeneration 1	OMIM:603075				0
GBT0268	203859	ANO5		Gnathodiaphyseal dysplasia	OMIM:166260				0
GBT0585	3815	KIT	DOID:350	mastocytosis	OMIM:154800	16590	Kit	MGI:96677	5	21148330	J:169611
GBT0268	203859	ANO5	DOID:0070201	Miyoshi muscular dystrophy 3	OMIM:613319				0
GBT0270	23414	ZFPM2	DOID:14448	46 XY gonadal dysgenesis	OMIM:616067				0
GBT0585	3815	KIT	DOID:3263	piebaldism	OMIM:172800	16590	Kit	MGI:96677	1	20095975	J:196572
GBT0572	4036	LRP2	DOID:0090144	Donnai-Barrow syndrome	OMIM:222448	14725	Lrp2	MGI:95794	1	20653565	J:166387
GBT0275	1286	COL4A4		Hematuria, familial benign	OMIM:141200				0
GBT0409	4882	NPR2	DOID:4480	achondroplasia	OMIM:100800	230103	Npr2	MGI:97372	3		J:170669, J:72465, J:26341
GBT0281	4967	OGDH		Alpha-ketoglutarate dehydrogenase deficiency	OMIM:203740				0
GBT0283	30011	SH3KBP1		Immunodeficiency 61	OMIM:300310
GBT0312	5792	PTPRF		Breasts and/or nipples, aplasia or hypoplasia of, 2	OMIM:616001				0
GBT0316	60681	FKBP10	DOID:0060231	Bruck syndrome	OMIM:259450,				0
GBT0316	60681	FKBP10	DOID:0110351	osteogenesis imperfecta type 11	OMIM:610968				0
GBT0346	83938	LRMDA	DOID:0070100	oculocutaneous albinism type VII	OMIM:615179				0
GBT0348	6261	RYR1		Minicore myopathy with external ophthalmoplegia	OMIM:255320				0
GBT0348	6261	RYR1		King-Denborough syndrome	OMIM:145600				0
GBT0348	6261	RYR1	DOID:0080102	congenital fiber-type disproportion	OMIM:255310				0
GBT0409	4882	NPR2	DOID:0080050	acromesomelic dysplasia, Maroteaux type	OMIM:602875	230103	Npr2	MGI:97372	2	17728275, 23065701	J:129973, J:188839 J
GBT0511	4948	OCA2	DOID:0050632	oculocutaneous albinism	OMIM:203200				1		J:215820
GBT0383	3791	KDR		Hemangioma, capillary infantile, somatic	OMIM:602089				0
GBT0396	56006	SMG9		Heart and brain malformation syndrome	OMIM:616920				0
GBT0409	4882	NPR2	DOID:0070316	Miura type epiphyseal chondrodysplasia	OMIM:615923				0
GBT0348	6261	RYR1	DOID:3529	central core myopathy	OMIM:117000	20190	Ryr1	MGI:99659	3	7515481, 19959667, 25564733	J:18895, J:155825, J:219285
GBT0348	6261	RYR1	DOID:8545	malignant hyperthermia	OMIM:145600	20190	Ryr1	MGI:99659	2	16284304, 17122579	J:105738, J:168222
GBT1093	6262	RYR2	DOID:0110071	arrhythmogenic right ventricular dysplasia 2	OMIM:600996	20191	Ryr2	MGI:99685	1	16873551	J:111780
GBT0422	3643	INSR	DOID:0050470	Diabetes mellitus, insulin-resistant, with acanthosis nigricans	OMIM:610549				0
GBT0422	3643	INSR	DOID:0050470	Rabson-Mendenhall syndrome	OMIM:262190				0
GBT0422	3643	INSR	DOID:0050470	Donohue syndrome	OMIM:246200				0
GBT0422	3643	INSR	DOID:0070220	familial hyperinsulinemic hypoglycemia 5	OMIM:609968				0
GBT1093	6262	RYR2	DOID:0060675	catecholaminergic polymorphic ventricular tachycardia 1	OMIM:604772	20191	Ryr2	MGI:99685	10	15890976, 20224043, 18419777, 22828895, 16873551, 23152493, 25775566, 27482086	J:109683, J:159451, J:186379, J:212640, J:111780, J:212870, J:220671, J:235432
GBT0437	844	CASQ1		Myopathy, vacuolar, with CASQ1 aggregates	OMIM:616231				0
GBT0503	6772	STAT1	DOID:2058	chronic mucocutaneous candidiasis	OMIM:614892|OMIM:613796|OMIM:614162	20846	Stat1	MGI:103063	0
GBT0510	10345	TRDN	DOID:0060675	catecholaminergic polymorphic ventricular tachycardia 1	OMIM:604772				0
GBT0510	10345	TRDN	DOID:0060679	catecholaminergic polymorphic ventricular tachycardia 5	OMIM:615441				0
GBT0238	7046	TGFBR1	DOID:8398	osteoarthritis	OMIM:140600|OMIM:165720|OMIM:607850|OMIM:612400	21812	Tgfbr1	MGI:98728	1	28716756	J:271724
GBT0511	4948	OCA2	DOID:0070096	oculocutaneous albinism type II	OMIM:203200				0
GBT0525	9479	MAPK8IP1	DOID:9352	type 2 diabetes mellitus	OMIM:125853	16658	Mafb	MGI:104555	0	27181683	J:237642
GBT0528	7704	ZBTB16		Skeletal defects, genital hypoplasia, and mental retardation	OMIM:612447				0
GBT0570	2736	GLI2	DOID:0080328	Culler-Jones syndrome	OMIM:615849	80859	Nfkbiz	MGI:1931595	0
GBT0570	2736	GLI2	DOID:0110873	holoprosencephaly 9	OMIM:610829	80859	Nfkbiz	MGI:1931595	0
GBT0238	7046	TGFBR1	DOID:418	systemic scleroderma	OMIM:181750	21812	Tgfbr1	MGI:98728	1	17195237	J:134135
GBT0585	3815	KIT	DOID:9119	acute myeloid leukemia	OMIM:601626				0
GBT0585	3815	KIT	DOID:5557	testicular germ cell cancer	OMIM:273300				0
GBT0031	7139	TNNT2	DOID:0110426	dilated cardiomyopathy 1D	OMIM:601494	21956	Tnnt2	MGI:104597	5	18606313, 27936050, 18349139, 17556660	J:211769, J:243725, J:161899, J:137784
GBT0031	7139	TNNT2	DOID:0110308	hypertrophic cardiomyopathy 2	OMIM:115195	21956	Tnnt2	MGI:104597	9	26092120, 23532597, 18349139, 16326803, 11171784, 10449439, 10562721, 9788962, 9637714	J:104369, J:213305, J:162685, J:161899, J:117554, J:56911, J:48301
GBT0133	7546	ZIC2	DOID:0110878	holoprosencephaly 5	OMIM:609637	22772	Zic2	MGI:106679	3	27466203, 18617531, 10677508	J:238567, J:60644, J:138862
GBT0710	9863	MAGI2	DOID:0080271	nephrotic syndrome type 15	OMIM:617609	50791	Magi2	MGI:1354953	0
GBT0411	10049	DNAJB6	DOID:0110305	autosomal dominant limb-girdle muscular dystrophy type 1	OMIM:603511				1	26362252	J:226488
GBT0750	1294	COL7A1	DOID:0080224	autosomal dominant dystrophic epidermolysis bullosa	OMIM:131750				0
GBT0750	1294	COL7A1	DOID:0111347	epidermolysis bullosa with congenital localized absence of skin and deformity of nails	OMIM:132000				0
GBT0750	1294	COL7A1	DOID:0080086	nonsyndromic congenital nail disorder 8	OMIM:607523				0
GBT0750	1294	COL7A1	DOID:0111345	transient bullous demolysis of the newborn	OMIM:131705				0
GBT0776	10913	EDAR	DOID:14793	hypohidrotic ectodermal dysplasia	OMIM:129490|OMIM:224900	13608	Edar	MGI:1343498	3	10431242, 17148670, 9799834	J:56496, J:116222, J:50575
GBT0776	10913	EDAR		[Hair morphology 1, hair thickness]	OMIM:612630	209086	Samd9l	MGI:1343184	0
GBT0785	79143	MBOAT7		Mental retardation, autosomal recessive 57	OMIM:617188				0
GBT0906	92609	TIMM50	DOID:0070002	3-methylglutaconic aciduria type 9	OMIM:617698				0
GBT0936	2070	EYA4	DOID:0110542	autosomal dominant nonsyndromic deafness 10	OMIM:601316	14051	Eya4	MGI:1337104	0
GBT0936	2070	EYA4	DOID:0110440	dilated cardiomyopathy 1J	OMIM:605362				0
GBT0959	2316	FLNA	DOID:14711	FG syndrome	OMIM:300321				0
GBT0270	23414	ZFPM2	DOID:3827	congenital diaphragmatic hernia	OMIM:610187	22762	Zfpm2	MGI:1334444	1	16103912	J:100119
GBT0270	23414	ZFPM2	DOID:6419	tetralogy of Fallot	OMIM:187500	22762	Zfpm2	MGI:1334444	1	10892744, 12223418	J:62879, J:78688
GBT0156	80144	FRAS1	DOID:0090001	Fraser syndrome 1	OMIM:219000				5	12766769, 12766770, 24143185, 15623520, 15838507	J:83745, J:83746, J:208682, J:137010, J:98344
GBT0268	203859	ANO5	DOID:0110284	autosomal recessive limb-girdle muscular dystrophy type 2L	OMIM:611307	233246	Ano5	MGI:3576659	1	26911675	J:235810
GBT0070	254394	MCM9	DOID:684	hepatocellular carcinoma	OMIM:114550	71567	Mcm9	MGI:1918817	3	21987787	J:177420
GBT1102	2632	GBE1		Polyglucosan body disease, adult form	OMIM:263570				0
GBT1118	728294	D2HGDH	DOID:0111351	D-2-hydroxyglutaric aciduria 1	OMIM:600721				0
GBT1129	8912	CACNA1H	DOID:1825	childhood absence epilepsy	OMIM:611942				0
GBT1129	8912	CACNA1H		Hyperaldosteronism, familial, type IV	OMIM:617027				0
GBT1300	5156	PDGFRA		Gastrointestinal stromal tumor/GIST-plus syndrome, somatic or familial	OMIM:175510				0
GBT1300	5156	PDGFRA		Hypereosinophilic syndrome, idiopathic, resistant to imatinib	OMIM:607685				0

## Sheet: Supplemental file 3
GBT	Human Gene ID	Human Gene Symbol	DO Disease ID	DO Disease Name/ OMIM Term	OMIM ID	Zebrafish models	Mouse models	Reference
GBT0010	1009	CDH11	DOID:0080345	blepharocheilodontic syndrome 1	OMIM:119580	0	0
GBT0010	1009	CDH11		Elsahy-Waters syndrome	OMIM:211380	0	0
GBT0016	5087	PBX1		congenital anomalies of kidney and urinary tract syndrome with or without hearing loss, abnormal ears, or developmental delay	OMIM:617641	0	0
GBT0028	1729	DIAPH1	DOID:0110541	autosomal dominant nonsyndromic deafness 1	OMIM:124900	0	0
GBT0031	7139	TNNT2	DOID:397	restrictive cardiomyopathy 3	OMIM:612422	0	0
GBT0031	7139	TNNT2	DOID:0110426	dilated cardiomyopathy 1D	OMIM:601494	0	5	Juan et al., 2008, Ramratnam et al., 2016, Lombardi et al., 2008, Du et al., 2007
GBT0031	7139	TNNT2	DOID:0110308	hypertrophic cardiomyopathy 2	OMIM:115195	1	9	Becker et al., 2012, Bao et al., 2015, Huke et al., 2013, Lombardi et al., 2008, Lim et al., 2001, Tardiff et al., 1999, Farza & Watkins, 1999, Oberst et al., 1998, Tardiff et al., 1998
GBT0060	3588	IL10RB	DOID:0110909	inflammatory bowel disease 25	OMIM:612567	0	0
GBT0070	254394	MCM9	DOID:0080496	ovarian dysgenesis 4	OMIM:616185	0	0
GBT0078	23426	GRIP1		Fraser syndrome 3	OMIM:617667	0	0
GBT0111/GBT0202	473	RERE		neurodevelopmental disorder with or without anomalies of the brain, eye, or heart	OMIM:616975	0	0
GBT0111/GBT0202	473	RERE		neurodevelopmental disorder with or without anomalies of the brain, eye, or heart	OMIM:616975	0	0
GBT0131	1643	DDB2	DOID:0110846	xeroderma pigmentosum group E	OMIM:278740	0	4	Yoon et al., 2005, Itoh, Cado, Kamide, & Linn, 2004
GBT0133	7546	ZIC2	DOID:0110878	holoprosencephaly 5	OMIM:609637	0	3	Houtmeyers et al., 2016, Warr et al., 2008, Nagai et al., 2000
GBT0135	79365	BHLHE41		[Short sleeper]	OMIM:612975	0	0
GBT0137	1915	EEF1A1	DOID:0070068	autosomal dominant non-syndromic intellectual disability 38	OMIM:616393	0	0
GBT0137	1915	EEF1A1	DOID:0080463	early infantile epileptic encephalopathy 33	OMIM:616409	0	0
GBT0156	80144	FRAS1	DOID:0090001	Fraser syndrome 1	OMIM:219000	0	5	McGregor et al., 2003, Vrontou et al., 2003, Miller et al., 2013, Petrou, Pavlakis, Dalezios, Galanopoulos, & Chalepakis, 2005, Jadeja et al., 2005
GBT0170	113263	GLCCI1		{Glucocorticoid therapy, response to}	OMIM:614400	0	0
GBT0178	100	ADA	DOID:5810	adenosine deaminase deficiency	OMIM:102700	0	1	Blackburn, Datta, & Kellems, 1998
GBT0181	55714	TENM3		Microphthalmia, isolated, with coloboma 9	OMIM:615145	0	0
GBT0186	775	CACNA1C	DOID:0060173	Timothy syndrome	OMIM:601005	0	1	Cheli et al., 2018, Schwartzer, Koenig, & Berman, 2013, Krey et al., 2013, Bader et al., 2011, MGI Reference: J:201506
GBT0186	775	CACNA1C	DOID:0110220	Brugada syndrome 3	OMIM:611875	0	0
GBT0208	88	ACTN2	DOID:0110428	dilated cardiomyopathy 1AA	OMIM:612158	0	0
GBT0209	1801	DPH1		Developmental delay with short stature, dysmorphic features, and sparse hair	OMIM:616901	0	0
GBT0209	1801	DPH1	DOID:0060469	Miller-Dieker lissencephaly syndrome	OMIM:247200	0	3	Yu, You, Yan, & Chen, 2014
GBT0230	83700	JAM3		Hemorrhagic destruction of the brain, subependymal calcification, and cataracts	OMIM: 613730	0	0
GBT0235	10128	LRPPRC	DOID:3652	French Canadian Leigh disease	OMIM:220111	0	0
GBT0238	7046	TGFBR1	DOID:8398	osteoarthritis	OMIM:140600|OMIM:165720|OMIM:607850|OMIM:612400	0	1	Wang et al., 2017
GBT0238	7046	TGFBR1	DOID:418	systemic scleroderma	OMIM:181750	0	1	Sonnylal et al., 2007
GBT0240	64919	BCL11B		Immunodeficiency 49	OMIM:617237	0	0
GBT0240	64919	BCL11B		Intellectual developmental disorder with dysmorphic facies, speech delay, and T-cell abnormalities	OMIM:618092	0	0
GBT0249	567	B2M	DOID:0050636	familial visceral amyloidosis	OMIM:105200	0	0
GBT0249	567	B2M		Immunodeficiency 43	OMIM:241600	0	0
GBT0251	668	FOXL2	DOID:5426	premature ovarian failure	OMIM:608996	0	0
GBT0251	668	FOXL2	DOID:14778	blepharophimosis, ptosis, and epicanthus inversus syndrome	OMIM:110100	0	2	Schmidt et al., 2004, Uda et al., 2004, Shi et al., 2014
GBT0256	5530	PPP3CA	DOID:0080472	infantile or early childhood epileptic encephalopathy 1	OMIM:617711	0	0
GBT0263/ GBT0980	83872	HMCN1	DOID:0110014	age related macular degeneration 1	OMIM:603075	0	0
GBT0268	203859	ANO5	DOID:0110284	autosomal recessive limb-girdle muscular dystrophy type 2L	OMIM:611307	0	1	Griffin et al., 2016
GBT0268	203859	ANO5		Gnathodiaphyseal dysplasia	OMIM:166260	0	0
GBT0268	203859	ANO5	DOID:0070201	Miyoshi muscular dystrophy 3	OMIM:613319	0	0
GBT0270/ GBT0978	23414	ZFPM2	DOID:14448	46 XY gonadal dysgenesis	OMIM:616067	0	0
GBT0270/ GBT0978	23414	ZFPM2	DOID:3827	congenital diaphragmatic hernia	OMIM:610187	0	1	Ackerman et al., 2005
GBT0270/ GBT0978	23414	ZFPM2	DOID:6419	tetralogy of Fallot	OMIM:187500	0	1	Tevosian et al., 2000, Tevosian et al., 2002
GBT0275	1286	COL4A4	DOID:0110033	autosomal recessive Alport syndrome	OMIM:203780	0	4	Korstanje et al., 2014, Arnold et al., 2011,MGI Reference: J:158794
GBT0275	1286	COL4A4		Hematuria, familial benign	OMIM:141200	0	0
GBT0281	4967	OGDH		Alpha-ketoglutarate dehydrogenase deficiency	OMIM:203740	0	0
GBT0283	30011	SH3KBP1		Immunodeficiency 61	OMIM:300310	0	0
GBT0312	5792	PTPRF		Breasts and/or nipples, aplasia or hypoplasia of, 2	OMIM:616001	0	0
GBT0316	60681	FKBP10	DOID:0060231	Bruck syndrome	OMIM:259450,	0	0
GBT0316	60681	FKBP10	DOID:0110351	osteogenesis imperfecta type 11	OMIM:610968	0	0
GBT0346	83938	LRMDA	DOID:0070100	oculocutaneous albinism type VII	OMIM:615179	0	0
GBT0348	6261	RYR1		Minicore myopathy with external ophthalmoplegia	OMIM:255320	0	0
GBT0348	6261	RYR1		King-Denborough syndrome	OMIM:145600	0	0
GBT0348	6261	RYR1	DOID:0080102	congenital fiber-type disproportion	OMIM:255310	0	0
GBT0348	6261	RYR1	DOID:3529	central core myopathy	OMIM:117000	0	3	Takeshima et al., 1994, Zvaritch et al., 2009, Hanson, Wilde, Moreno, Minic, & Niswander, 2015
GBT0348	6261	RYR1	DOID:8545	malignant hyperthermia	OMIM:145600	0	2	Chelu et al., 2006, Yang et al., 2006
GBT0383	3791	KDR		Hemangioma, capillary infantile, somatic	OMIM:602089	0	0
GBT0396	56006	SMG9		Heart and brain malformation syndrome	OMIM:616920	0	0
GBT0409	4882	NPR2	DOID:0070316	Miura type epiphyseal chondrodysplasia	OMIM:615923	0	0
GBT0409	4882	NPR2	DOID:4480	achondroplasia	OMIM:100800	0	3	MGI Reference: J:170669, J:72465, J:26341
GBT0409	4882	NPR2	DOID:0080050	acromesomelic dysplasia, Maroteaux type	OMIM:602875	0	2	Sogawa, Tsuji, Shinkai, Katayama, & Kunieda, 2007, Geister et al., 2013
GBT0411	10049	DNAJB6	DOID:0110305	autosomal dominant limb-girdle muscular dystrophy type 1	OMIM:603511	0	1	Bengoechea, Pittman, Tuck, True, & Weihl, 2015
GBT0422	3643	INSR	DOID:0050470	Diabetes mellitus, insulin-resistant, with acanthosis nigricans	OMIM:610549	0	0
GBT0422	3643	INSR	DOID:0050470	Rabson-Mendenhall syndrome	OMIM:262190	0	0
GBT0422	3643	INSR	DOID:0050470	Donohue syndrome	OMIM:246200	0	0
GBT0422	3643	INSR	DOID:0070220	familial hyperinsulinemic hypoglycemia 5	OMIM:609968	0	0
GBT0437	844	CASQ1		Myopathy, vacuolar, with CASQ1 aggregates	OMIM:616231	0	0
GBT0503	6772	STAT1	DOID:2058	chronic mucocutaneous candidiasis	OMIM:614892|OMIM:613796|OMIM:614162	0	0
GBT0510	10345	TRDN	DOID:0060675	catecholaminergic polymorphic ventricular tachycardia 1	OMIM:604772	0	0
GBT0510	10345	TRDN	DOID:0060679	catecholaminergic polymorphic ventricular tachycardia 5	OMIM:615441	0	0
GBT0511	4948	OCA2	DOID:0070096	oculocutaneous albinism type II	OMIM:203200	0	0
GBT0511	4948	OCA2	DOID:0050632	oculocutaneous albinism	OMIM:203200	0	1	MGI Reference: J:215820
GBT0525	9479	MAPK8IP1	DOID:9352	type 2 diabetes mellitus	OMIM:125853	0	0
GBT0528	7704	ZBTB16		Skeletal defects, genital hypoplasia, and mental retardation	OMIM:612447	0	0
GBT0570	2736	GLI2	DOID:0080328	Culler-Jones syndrome	OMIM:615849	0	0
GBT0570	2736	GLI2	DOID:0110873	holoprosencephaly 9	OMIM:610829	0	0
GBT0572	4036	LRP2	DOID:0090144	Donnai-Barrow syndrome	OMIM:222448	0	1	Chiu-Ugalde et al., 2010
GBT0585	3815	KIT	DOID:9119	acute myeloid leukemia	OMIM:601626	0	0
GBT0585	3815	KIT	DOID:5557	testicular germ cell cancer	OMIM:273300	0	0
GBT0585	3815	KIT	DOID:9253	gastrointestinal stromal tumor	OMIM:606764	0	5	Rubin et al., 2005, Nakai et al., 2008, Bosbach et al., 2012, Sommer et al., 2003, Rubin et al., 2005
GBT0585	3815	KIT	DOID:350	mastocytosis	OMIM:154800	0	5	Gerbaulet et al., 2011
GBT0585	3815	KIT	DOID:3263	piebaldism	OMIM:172800	0	1	Guo, Ruan, Li, Gao, & Li, 2010
GBT0710	9863	MAGI2	DOID:0080271	nephrotic syndrome type 15	OMIM:617609	0	0
GBT0750	1294	COL7A1	DOID:0060642	recessive dystrophic epidermolysis bullosa	OMIM:226600	0	4	Fritsch et al., 2008, Ito et al., 2009, Heinonen et al., 1999
GBT0750	1294	COL7A1	DOID:0080224	autosomal dominant dystrophic epidermolysis bullosa	OMIM:131750	0	0
GBT0750	1294	COL7A1	DOID:0111347	epidermolysis bullosa with congenital localized absence of skin and deformity of nails	OMIM:132000	0	0
GBT0750	1294	COL7A1	DOID:0080086	nonsyndromic congenital nail disorder 8	OMIM:607523	0	0
GBT0750	1294	COL7A1	DOID:0111345	transient bullous demolysis of the newborn	OMIM:131705	0	0
GBT0776	10913	EDAR	DOID:14793	hypohidrotic ectodermal dysplasia	OMIM:129490|OMIM:224900	0	3	Headon & Overbeek, 1999, Fessing, Sharova, Sharov, Atoyan, & Botchkarev, 2006, Majumder et al., 1998
GBT0776	10913	EDAR		[Hair morphology 1, hair thickness]	OMIM:612630	0	0
GBT0785	79143	MBOAT7		Mental retardation, autosomal recessive 57	OMIM:617188	0	0
GBT0906	92609	TIMM50	DOID:0070002	3-methylglutaconic aciduria type 9	OMIM:617698	0	0
GBT0936	2070	EYA4	DOID:0110542	autosomal dominant nonsyndromic deafness 10	OMIM:601316	0	0
GBT0936	2070	EYA4	DOID:0110440	dilated cardiomyopathy 1J	OMIM:605362	0	0
GBT0959	2316	FLNA	DOID:14711	FG syndrome	OMIM:300321	0	0
GBT0959	2316	FLNA	DOID:0050454	periventricular nodular heterotopia	OMIM:300049	0	1	Hart et al., 2006
GBT1023	1453	CSNK1D	DOID:0110012	advanced sleep phase syndrome 2	OMIM:615224	0	2	Xu et al., 2005
GBT1093	6262	RYR2	DOID:0110071	arrhythmogenic right ventricular dysplasia 2	OMIM:600996	0	1	Kannankeril et al., 2006
GBT1093	6262	RYR2	DOID:0060675	catecholaminergic polymorphic ventricular tachycardia 1	OMIM:604772	0	10	Cerrone et al., 2005, Uchinoumi et al., 2010, Goddard et al., 2008, Shan et al., 2012, Kannankeril et al., 2006, Loaiza et al., 2013, Zhao et al., 2015, Aiba, Wehrens, & Noebels, 2016
GBT1102	2632	GBE1		Polyglucosan body disease, adult form	OMIM:263570	0	0
GBT1102	2632	GBE1	DOID:2750	glycogen storage disease IV	OMIM:232500	0	4	Akman et al., 2011, Orhan Akman et al., 2015, Lee, Chang, Bali, Chen, & Yan, 2011
GBT1105	6913	TBX15		Cousin syndrome	OMIM:260660	0	0
GBT1118	728294	D2HGDH	DOID:0111351	D-2-hydroxyglutaric aciduria 1	OMIM:600721	0	0
GBT1129	8912	CACNA1H	DOID:1825	childhood absence epilepsy	OMIM:611942	0	0
GBT1129	8912	CACNA1H		Hyperaldosteronism, familial, type IV	OMIM:617027	0	0
GBT1300	5156	PDGFRA		Gastrointestinal stromal tumor/GIST-plus syndrome, somatic or familial	OMIM:175510	0	0
GBT1300	5156	PDGFRA		Hypereosinophilic syndrome, idiopathic, resistant to imatinib	OMIM:607685	0	0
