# Supplementary material for: Building the vertebrate codex using the gene breaking protein trap library
Source: eLife. 2020 Aug 11;9:e54572. doi: 10.7554/eLife.54572 (PMC7486118; doi:10.7554/eLife.54572)
Supplement: Supplementary file 4. — Subcellular localizations of 177 human orthologs tagged in GBT-confirmed lines were listed using experimental data from Human Protein Atlas (www.proteinatlas.org) (Uhlén et al., 2015) and knowledge base data from the UniProt knowledge base (UniProtKB, https://www.uniprot.org/, UniProt Consortium, 2018). *: UniProt annotation data, †: GO – Cellular Component, ‡: sequence of single 5’ or 3’ RACE product matched to two separate transcripts. [file elife-54572-supp4.xlsx]

## Sheet: Sheet1
Subcellular localization (271)	Line	Zebrafish Gene Symbol	Human Ortholog Gene Symbol	Reliability of HPA
Nucleus (30)
	GBT0021	cntnap5b	CNTNAP5	Supported
	GBT0035	parga	PARG	Enhanced
	GBT0082	cct8	CCT8	Approved
	GBT0111/GBT0202	rerea	RERE	Not available*
	GBT0143	wtip	WTIP	Not available*
	GBT0151	nusap1	NUSAP1	Enhanced
	GBT0171	unc79	UNC79	Approved
	GBT0189/GBT0195/GBT0795	znf414	ZNF414	Approved
	GBT0190	barhl2	BARHL2	Not available*
	GBT0204	cadm4	CADM4	Approved
	GBT0237	nrg2a	NRG2	Supported
	GBT0240	bcl11ba	BCL11B	Approved
	GBT0251	foxl2a	FOXL2	Supported
	GBT0323	adarb2	ADARB2	Not available*
	GBT0346	lrmda	LRMDA	Supported
	GBT0398	pnpla7a	PNPLA7	Uncertain*
	GBT0412	xpo7	XPO7	Approved
	GBT0415	arrdc1b	ARRDC1	Approved
	GBT0419	rxraa	RXRA	Supported
	GBT0434	gar1	GAR1	Approved
	GBT0513	map2k6	MAP2K6	Supported
	GBT0528	zbtb16a	ZBTB16	Not available*
	GBT0552	znf1015	ZNF579	Approved
	GBT0554	gsto2	GSTO2	Approved
	GBT0570	gli2a	GLI2	Supported
	GBT0593	skp1	SKP1	Supported
	GBT0757	kat2a	KAT2A	Not available*
	GBT0951	macrod2	MACROD2	Supported
	GBT1023	csnk1da	CSNK1D	Supported
	GBT1300	pdgfra	PDGFRA	Approved
Nuclear membrane (2)
	GBT0204	cadm4	CADM4	Approved
	GBT0591	dhx37	DHX37	Approved
Nucleoli (14)
Nucleoli (5)	GBT0237	nrg2a	NRG2	Supported
	GBT0415	arrdc1b	ARRDC1	Approved
	GBT0554	gsto2	GSTO2	Approved
	GBT0570	gli2a	GLI2	Supported
	GBT0951	macrod2	MACROD2	Supported
Nucleoli fibrillar center (9)
	GBT0021	cntnap5b	CNTNAP5	Supported
	GBT0151	nusap1	NUSAP1	Supported
	GBT0156	fras1	FRAS1	Approved
	GBT0200	znrd1	ZNRD1	Supported
	GBT0240	bcl11ba	BCL11B	Approved
	GBT0292	znrd1	ZNRD1	Supported
	GBT0319/GBT0321	ino80c	INO80C	Supported
	GBT0434	gar1	GAR1	Supported
	GBT1023	csnk1da	CSNK1D	Supported
Nucleoplasm (44)
Nuclear bodies (4)	GBT0040	hoxa3a	HOXA4	Enhanced
	GBT0133	zic2a	ZIC2	Supported
	GBT0255	ncam2	NCAM2	Approved
	GBT0402	scaf11	SCAF11	Supported
Nuclear speckles (1)
	GBT1033	rreb1b	RREB1	Supported
Nucleoplasm (39)
	GBT0001	casz1	CASZ1	Supported
	GBT0002	sorbs2b	SORBS2	Supported
	GBT0007	nrde2	NRDE2	Supported
	GBT0016	pbx1a	PBX1	Enhanced
	GBT0033	lrch4	LRCH4	Approved
	GBT0070	mcm9	MCM9	Approved
	GBT0096	sh3glb2b	SH3GLB2	Approved
	GBT0101	dido1	DIDO1	Approved
	GBT0131	ddb2	DDB2	Supported
	GBT0135	bhlhe41	BHLHE41	Approved
	GBT0181	tenm3	TENM3	Approved
	GBT0188	pole4	POLE4	Approved
	GBT0205	fam117ab	FAM117A	Approved
	GBT0209	dph1	DPH1	Approved
	GBT0241	fip1l1a	FIP1L1	Enhanced
	GBT0242	tex261	TEX261	Approved
	GBT0243	ppp1r13ba	PPP1R13B	Supported
	GBT0256	ppp3cb	PPP3CA	Enhanced
	GBT0261	capn12	CAPN12	Approved
	GBT0270/GBT0978	zfpm2a	ZFPM2	Supported
	GBT0340	nfatc3a	NFATC3	Supported
	GBT0364	mat2aa	MAT2A	Approved
	GBT0402	scaf11	SCAF11	Enhanced
	GBT0411	dnajb6b	DNAJB6	Supported
	GBT0416	csrnp1b	CSRNP1	Enhanced
	GBT0433	ddb1	DDB1	Enhanced
	GBT0503	stat1a	STAT1	Enhanced
	GBT0523	marcksl1a	MARCKSL1	Supported
Nucleoplasm cont.(38)
	GBT0527	tob1a	TOB1	Approved
	GBT0717	taf6l	TAF6L	Supported
	GBT0722	dip2cb	DIP2C	Approved
	GBT0906	timm50	TIMM50	Supported
	GBT0936	eya4	EYA4	Approved
	GBT0941	zmiz2	ZMIZ2	Supported
	GBT0993	cdip1	CDIP1	Supported
	GBT1093	ryr2a	RYR2	Approved
	GBT1102	gbe1a	GBE1	Approved
	GBT1105	tbx15	TBX15	Approved
	GBT1129	cacna1ha	CACNA1H	Approved
Cytoskeleton (19)
Actin filaments (4)	GBT0329	csgalnact1a	CSGALNACT1	Supported
	GBT0522	fabp2	FABP2	Approved
	GBT0523	marcksl1a	MARCKSL1	Supported
	GBT0959	Flna	FLNA	Enhanced
Focal adhesion sites (3)
	GBT0005	itgb1b	ITGB1	Supported
	GBT0033	lrch4	LRCH4	Approved
	GBT0261	capn12	CAPN12	Approved
Intermediate filaments (3)
	GBT0082	cct8	CCT8	Approved
	GBT0397	phactr4b	PHACTR4	Approved
	GBT0726	Radx	RADX	Approved
Cytokinetic bridge (2)
	GBT0251	foxl2a	FOXL2	Supported
	GBT0325	megf6b	MEGF6	Approved
Microtubules (3)
	GBT0239	map7d1b	MAP7D1	Approved
	GBT0271	map7d1a	MAP7D1	Approved
	GBT0325	megf6b	MEGF6	Approved
Cytoskeleton (4)
	GBT0031	tnnt2a	TNNT2	Uncertain*
	GBT0365	Sncgb	SNCG	Not available*
	GBT0545	wasf3b	WASF3	Not available*
	GBT0757	kat2a	KAT2A	Not available*
Centrosome (5)
Centrosome (4)	GBT0039	gabbr1,2	GABBR1	Approved
	GBT0993	cdip1	CDIP1	Supported
	GBT1105	tbx15	TBX15	Approved
	GBT0951	macrod2	MACROD2	Approved
Centriolar satellite (1)
	GBT1027	kirrel3l	KIRREL2	Supported
Cytosol (46)
	GBT0001	casz1	CASZ1	Approved
	GBT0031	tnnt2a	TNNT2	Uncertain*
	GBT0033	lrch4	LRCH4	Approved
	GBT0060	crfb4	IL10RB	Approved
	GBT0073/GBT0077	abcf1	ABCF1	Enhanced
	GBT0082	cct8	CCT8	Approved
	GBT0094	fgf13b	FGF13	Supported
	GBT0096	sh3glb2b	SH3GLB2	Supported
	GBT0101	dido1	DIDO1	Approved
	GBT0103	cyth3a	CYTH3	Supported
	GBT0137	eef1a1b	EEF1A1	Supported
	GBT0144	unkl	UNKL	Supported
	GBT0168	fgf13a	FGF13	Supported
	GBT0178	ada	ADA	Approved
	GBT0188	pole4	POLE4	Approved
	GBT0189/GBT0195/GBT0795	znf414	ZNF414	Approved
	GBT0196	ahnak	AHNAK	Supported
	GBT0239	map7d1b	MAP7D1	Approved
	GBT0242	tex261	TEX261	Approved
	GBT0243	ppp1r13ba	PPP1R13B	Supported
	GBT0249	b2ml	B2M	Enhanced
	GBT0256	ppp3cb	PPP3CA	Supported
	GBT0271	map7d1a	MAP7D1	Approved
	GBT0283	sh3kbp1	SH3KBP1	Supported
	GBT0340	nfatc3a	NFATC3	Supported
	GBT0346	lrmda	LRMDA	Approved
	GBT0348	ryr1b	RYR1	Approved
	GBT0364	mat2aa	MAT2A	Approved
	GBT0396	smg9	SMG9	Approved
	GBT0397	phactr4b	PHACTR4	Approved
	GBT0401	ERC1	ERC1	Supported
	GBT0503	stat1a	STAT1	Enhanced
	GBT0510	si:ch211-266g18.10	TRDN	Approved
	GBT0513	map2k6	MAP2K6	Supported
	GBT0520	gpc1a	GPC1	Approved
	GBT0522	fabp2	FABP2	Approved
	GBT0523	marcksl1a	MARCKSL1	Supported
	GBT0593	skp1	SKP1	Approved
	GBT0700	ttc23	TTC23	Approved
	GBT0722	dip2cb	DIP2C	Approved
	GBT0785	mboat7	MBOAT7	Approved
	GBT0959	flna	FLNA	Enhanced
	GBT1036	mark4a	MARK4	Approved
	GBT1093	ryr2a	RYR2	Approved
	GBT1102	gbe1a	GBE1	Approved
	GBT1248	tnk2a	TNK2	Approved
Mitochondria (13)
	GBT0007	nrde2	NRDE2	Supported
	GBT0172	tmem30aa	TMEM30A	Supported
	GBT0235	lrpprc	LRPPRC	Enhanced
	GBT0281	ogdhb	OGDH	Enhanced
	GBT0396	smg9	SMG9	Approved
	GBT0425	mrps18b	MRPS18B	Supported
	GBT0437	casq1a	CASQ1	Uncertain*
	GBT0572	lrp2a	LRP2	Approved
	GBT0599	mcu	MCU	Supported
	GBT0906	timm50	TIMM50	Supported
	GBT0926	dele1	DELE1	Uncertain*
	GBT0966	plpp2a	PLPP2	Approved
	GBT1118	d2hgdh	D2HGDH	Approved
Endoplasmic reticulum (7)
	GBT0005	itgb1b	ITGB1	Approved
	GBT0078	grip1	GRIP1	Not available*
	GBT0268	ano5a	ANO5	Not available*
	GBT0410	vapal	VAPA	Enhanced
	GBT0437	casq1a	CASQ1	Uncertain*
	GBT0972	dlg1	DLG1	Uncertain*
	GBT1278	selenos	SELENOS	Enhanced
Golgi apparatus (7)
	GBT0157	mgat5	MGAT5	Not available*
	GBT0230	jam3a	JAM3	Enhanced
	GBT0249	b2ml	B2M	Enhanced
	GBT0312	ptprfb	PTPRF	Approved
	GBT0348	ryr1b	RYR1	Approved
	GBT0419	rxraa	RXRA	Supported
	GBT1070	zfpl1	ZFPL1	Enhanced
Vesicles (19)
	GBT0021	cntnap5b	CNTNAP5	Approved
	GBT0101	dido1	DIDO1	Approved
	GBT0035	parga	PARG	Enhanced
	GBT0046	epha4b	EPHA4	Not available*
	GBT0067	myom3	MYOM3	Approved
	GBT0126	nrp2b	NRP2	Supported
	GBT0145	epn2	EPN2	Supported
	GBT0175	arhgef25b	ARHGEF25	Approved
	GBT0232	syt5b	SYT5	Not available*
	GBT0238	tgfbr1b	TGFBR1	Approved
Vesicles cont. (19)
	GBT0316	fkbp10b	FKBP10	Approved
	GBT0348	ryr1b	RYR1	Approved
	GBT0401	erc1b	ERC1	Supported
	GBT0422	insrb	INSR	Approved
	GBT0527	tob1a	TOB1	Approved
	GBT0572	lrp2a	LRP2	Approved
	GBT0710	magi2a	MAGI2	Not available*
	GBT0722	dip2cb	DIP2C	Approved
	GBT1129	cacna1ha	CACNA1H	Approved
Plasma membrane (49)
Cell junctions (3)	GBT0760	adgrl2b.1	ADGRL2	Approved
	GBT1042	pard3bb	PARD3B	Supported
	GBT1300	pdgfra	PDGFRA	Supported
Plasma membrane (46)
	GBT0005	itgb1b	ITGB1	Supported
	GBT0010	cdh11	CDH11	Not available*
	GBT0020/GBT0113	cntn3a.1	CNTN3	Not available*
	GBT0028	LOC101882228‡	DIAPH1	Approved
	GBT0043	cd99l2	CD99L2	Supported
	GBT0046	epha4b	EPHA4	Not available*
	GBT0078	grip1	GRIP1	Not available*
	GBT0091	enox1	ENOX1	Supported
	GBT0126	nrp2b	NRP2	Supported
	GBT0141	gpm6ba	GPM6B	Not available*
	GBT0154	si:ch211-163l21.8	KIAA1324	Supported
	GBT0166	atp1b2a	ATP1B2	Not available*
	GBT0171	unc79	UNC79	Approved
	GBT0178	ada	ADA	Supported
	GBT0186	cacna1c	CACNA1C	Not available*
	GBT0196	ahnak	AHNAK	Supported
	GBT0201	mhc1zca	MR1	Supported
	GBT0203	ntm	IGSF5	Not available*
	GBT0231	neo1a	NEO1	Approved
	GBT0238	tgfbr1b	TGFBR1	Supported
	GBT0249	b2ml	B2M	Enhanced
	GBT0250	ptprma	PTPRM	Approved
	GBT0255	ncam2	NCAM2	Supported
	GBT0268	ano5a	ANO5	Not available*
	GBT0313	csmd2	CSMD2	Not available*
	GBT0322	si:ch211-160j14.3	COL23A1	Not available*
	GBT0369	gpm6ab	GPM6A	Not available*
	GBT0383	kdr	KDR	Supported
	GBT0389	mosmob	MOSMO	Not available*
	GBT0397	phactr4b	PHACTR4	Approved
	GBT0399	kirrel3a	KIRREL3	Not available*
Plasma membrane cont. (46)	GBT0401	erc1b	ERC1	Supported
	GBT0409	npr2	NPR2	Not available*
	GBT0510	si:ch211-266g18.10	TRDN	Approved
	GBT0520	gpc1a	GPC1	Supported
	GBT0522	fabp2	FABP2	Approved
	GBT0525	mapk8ip1b	MAPK8IP1	Enhanced
	GBT0534	napab	NAPA	Uncertain*
	GBT0585	kita	KIT	Supported
	GBT0700	ttc23	TTC23	Approved
	GBT0710	magi2a	MAGI2	Not available*
	GBT0760	adgrl2b.1	ADGRL2	Approved
	GBT0959	flna	FLNA	Enhanced
	GBT0972	dlg1	DLG1	Uncertain*
	GBT1093	ryr2a	RYR2	Approved
	GBT1300	pdgfra	PDGFRA	Supported
Extracellular region and secreted (6)
	GBT0157	mgat5	MGAT5	Not available*
	GBT0263/GBT0980	hmcn1	HMCN1	Not available*
	GBT0275	col4a4	COL4A4	Not available*
	GBT0286	emid1	EMID1	Not available*
	GBT0399	kirrel3a	KIRREL3	Not available*
	GBT0750	col7a1	COL7A1	Not available*
Other locations (10)
Membrane, Cytoplasm	GBT0019	kcnk10b	KCNK10	Not available*
Z line	GBT0038	srpx	SRPX	Not available*
Membrane	GBT0125	cd302	CD302	Not available*
Membrane	GBT0142	aatka	AATK	Uncertain*
Cytoplasm †	GBT0170	glcci1a	GLCCI1	Uncertain*
Membrane	GBT0208	actn2b	ACTN2	Not available*
Membrane	GBT0357	ca16b	PTPRG	Not available*
Melanosome membrane	GBT0435	nrxn2a	NRXN2	Not available*
Membrane	GBT0511	oca2	OCA2	Not available*
Cell surface	GBT0776	edar	EDAR	Not available*
