# Supplementary material for: Building the vertebrate codex using the gene breaking protein trap library
Source: eLife. 2020 Aug 11;9:e54572. doi: 10.7554/eLife.54572 (PMC7486118; doi:10.7554/eLife.54572)
Supplement: Supplementary file 5. [file elife-54572-supp5.xlsx]

## Sheet: Supplementary file 5
Oligo Name	DNA sequence
MISC-bact_exon-F1	5’-CAGCTAGTGCGGAATATCATCTGCC-3’
MISC-bact_intron-R1	5’-CTTCTCGAGGTGAATTCCGGCTGAACTGTA-3’
R-ITR P1	5’-AATTTTCCCTAAGTACTTGTACTTTCACTTGAGTAA-3’
LP1	5’-GTAATACGACTCACTATAGGGCACGCGTG- 3’
R-ITR P2	5’-TCACTTGAGTAAAATTTTTGAGTACTTTTTACACCTC-3’
LP2	5’-GCGTGGTCGACTGCGCAT-3’
lrpprc FP	5’-TGATAATGCTGAGGAAGCTCTCAAACTG-3’
lrpprc RP	5’-CCTTCATCTCCTTCAGTATGTCTAACGC-3’
eef1a1l1 FP	5’-CCGTCTGCCAACTTCAGGATGTGT-3’
eef1a1l1 RP	5’-TTGAGGACACCAGTCTCCAACACGA-3’
5R-mRFP-P1	5’-CGCCCTTGGTCACCTTCAGCTT-3’
DP1	5’-WCAGNTGWTNGTNCTG-3’
DP2	5’-WGTGNAGNANCANAGA-3’
DP3	5’-STTGNTASTNCTNTGC-3’
DP4	5’-NCASGAWAGNCSWCAA-3’
3R-GM2-P1	5’-ACCTGTCCACACAATCTGCCCTTTC-3’
3R-tagBFP-P1	5’-AGCCATCTGATCGCAAACATCAAG-3’
5R-mRFP-P2	5’-CCTTGAAGCGCATGAACTCCTTGAT-3’
3R-GM2-P2	5’-TGGGATTACACATGGCATGGATGAAC-3’
3R-tagBFP-P2	5’-CGCTAAGAACCTCAAGATGCCTGG-3’
TAIL-bA-SA	5’-TGACCGCTAGTGGGTGGTAACGAT-3’
Tol2-ITR(L)-O1	5’-AATTAAACTGGGCATCAGCGCAATT-3’
Tol2-ITR(L)-O3	5’-CCAAGGGAAAATAGAATGAAGTGATCTCCA-3’
CDS-mRFP*-F1	5’-AAGAATTCGAAGGTGCCTCCTCCGAGGATGTCATCAAGG-3’
CDS-mRFP-R1	5’-AAACTAGTCTTAGGCTCCGGTGGAGTGGCGG-3’
adapter-GBT(+2)-a	5’-CCGGTTTTCTCATTCATTTACAGTCAGCCGG-3’
adapter-GBT (+2)-b	5’-AATTCCGGCTGACTGTAAATGAATGAGAAAA-3’
adapter-GBT (+3)-a	5’-CCGGTTTTCTCATTCATTTACAGCAGCCGG-3’
adapter-GBT(+3)-b	5’-AATTCCGGCTGCTGTAAATGAATGAGAAAA-3’
